# Supplementary material
Source: PubMed Central journal article supplement (PMC4490828)

Supporting Information for:

**Chemoselective Allene Aziridination *via* Ag(I) Catalysis**

Jared W. Rigoli, Cale D. Weatherly, Brian T. Vo, Samuel Neale, Alan R. Meis, and Jennifer M. Schomaker\*

*Department of Chemistry, University of Wisconsin-Madison, 1101 University Avenue*

*Madison, Wisconsin, 53706-1396*

|                                |      |
|--------------------------------|------|
| <b>Table of Contents</b> ..... | S1-1 |
| <b>NMR Spectra</b> .....       | S1-2 |

Compound 4a.

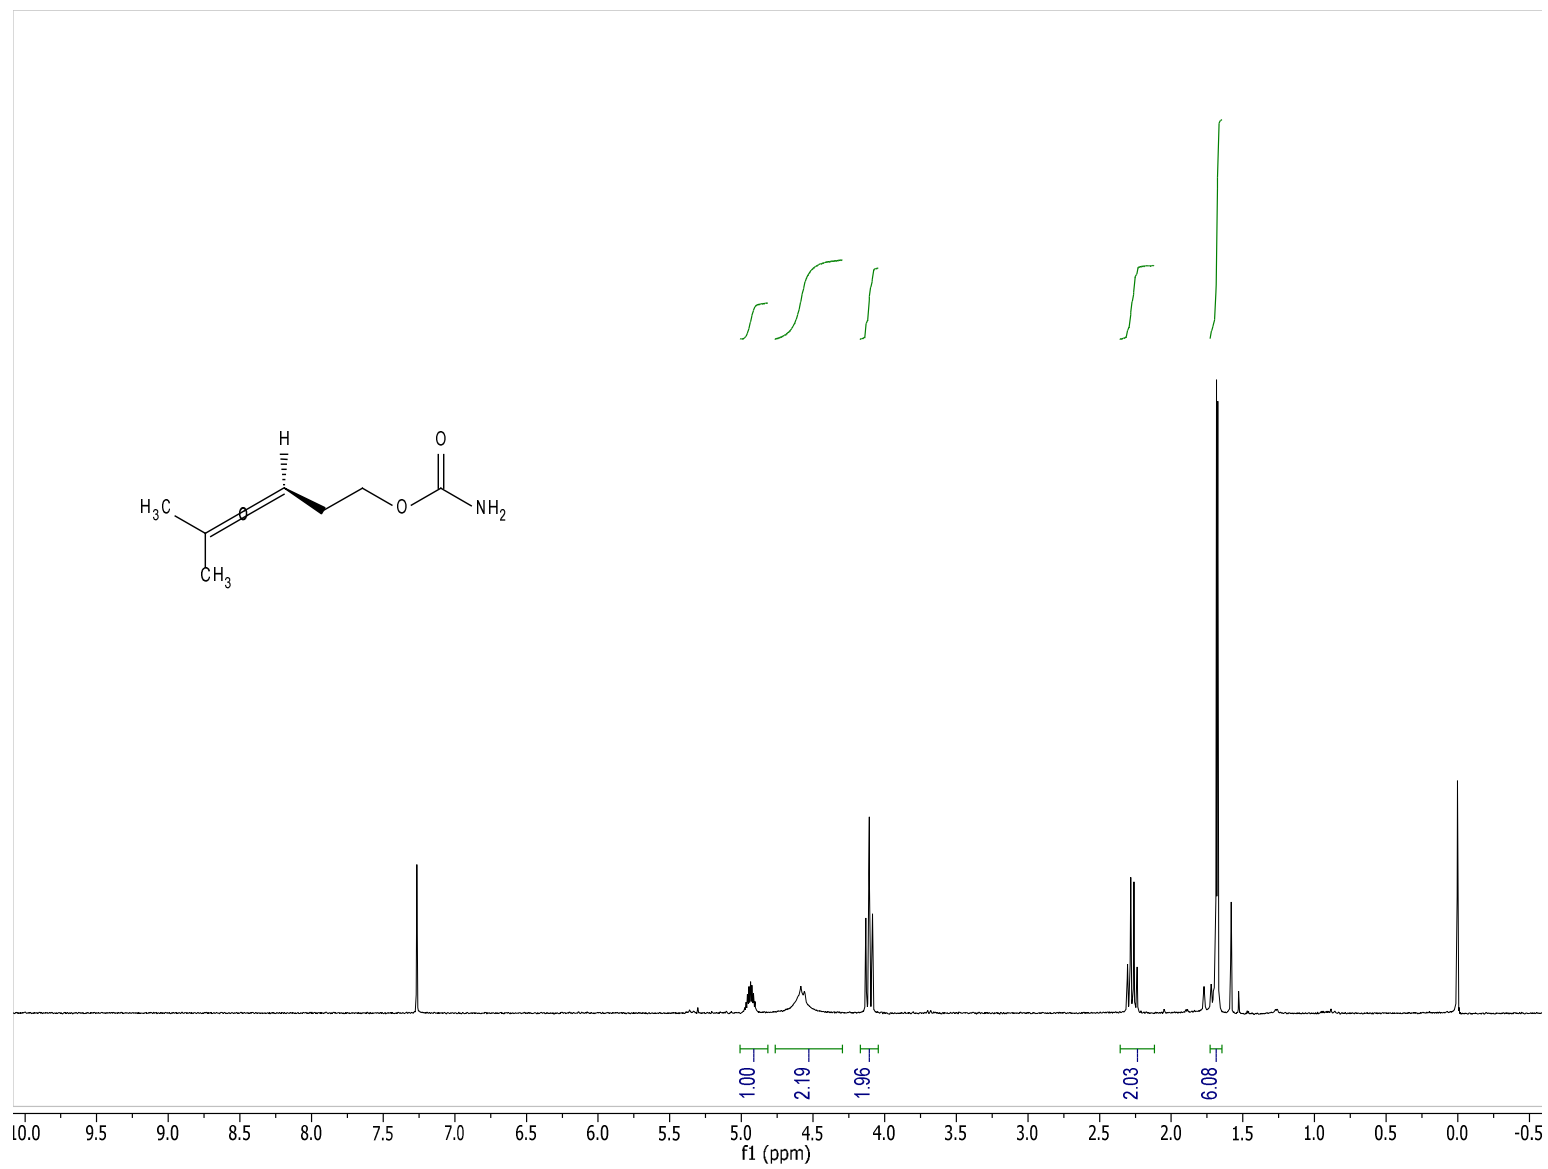

Compound 4a.

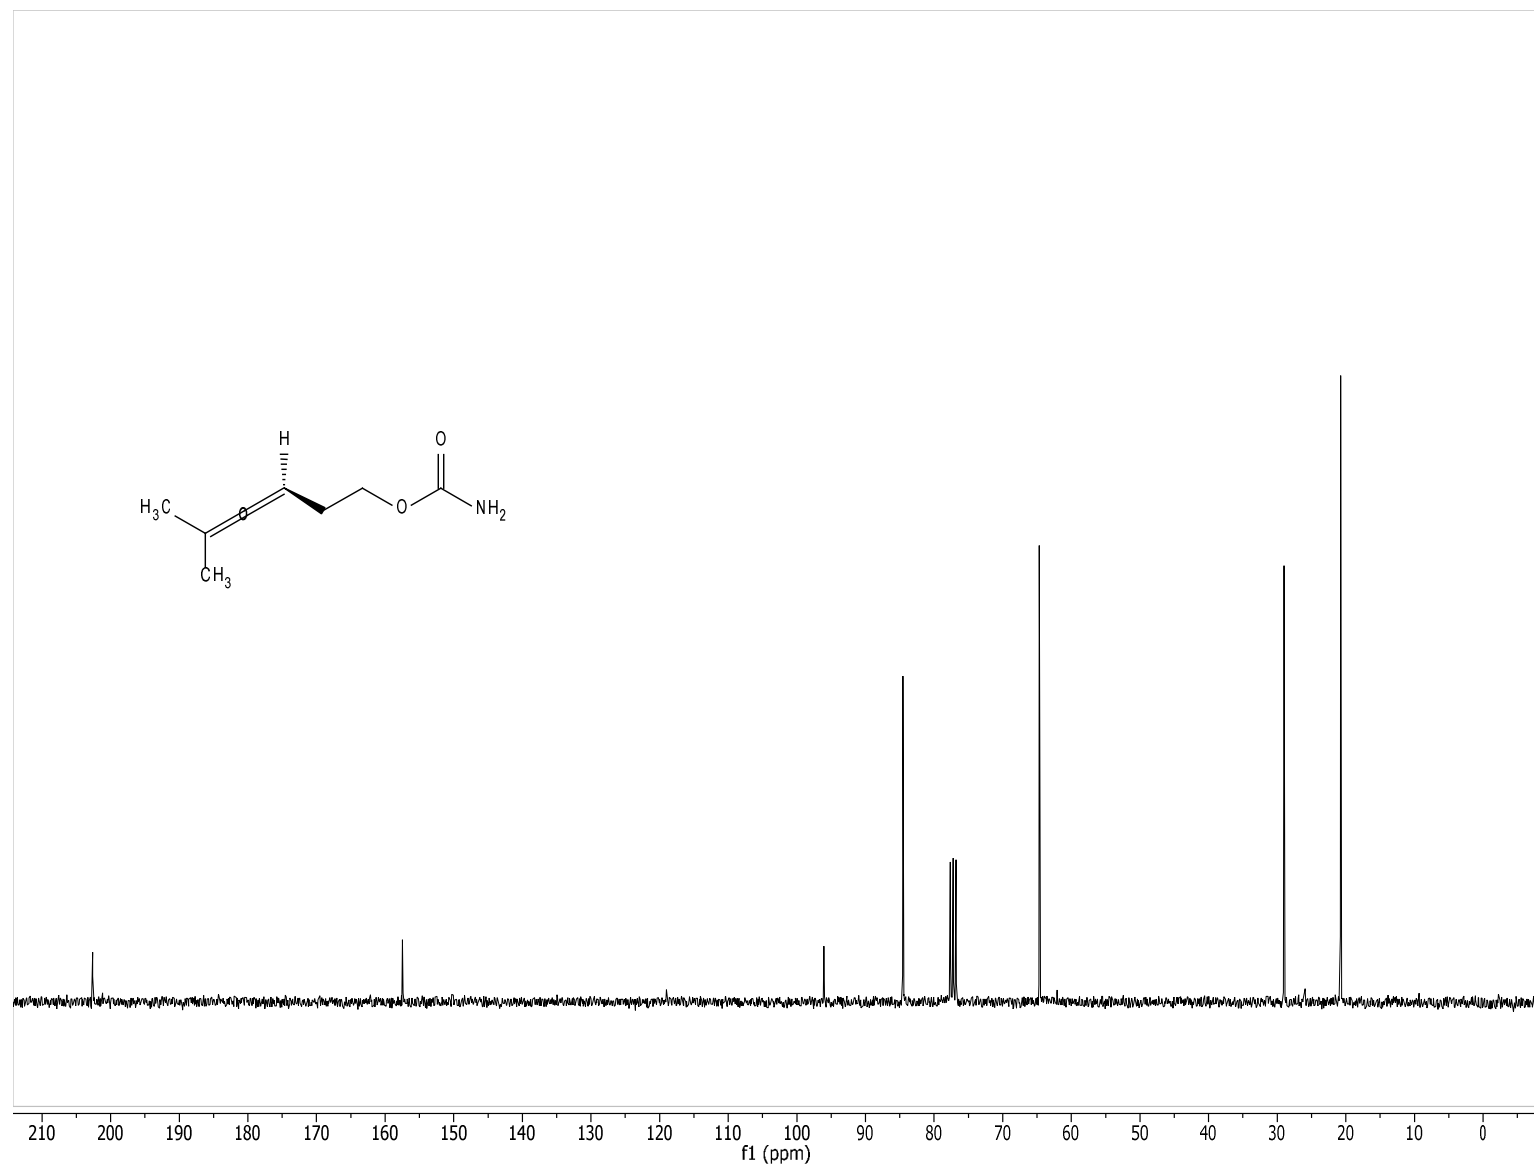

Compound 7b.

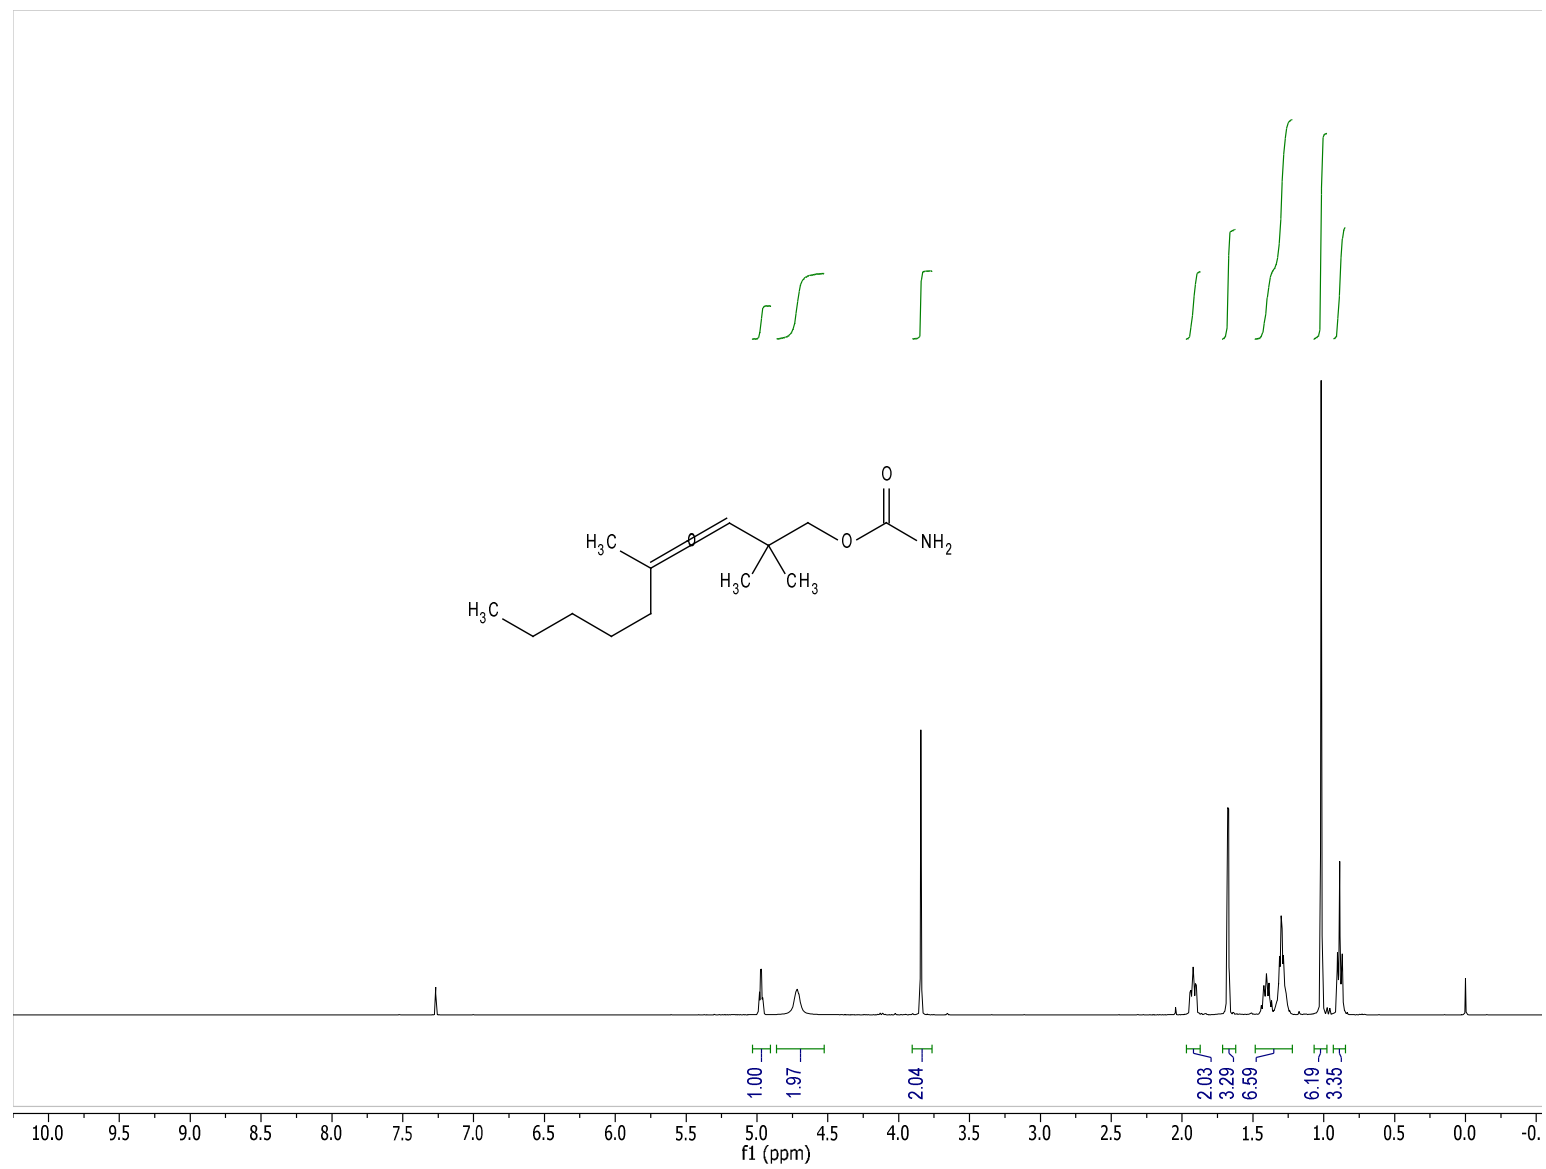

**Compound 7b.**

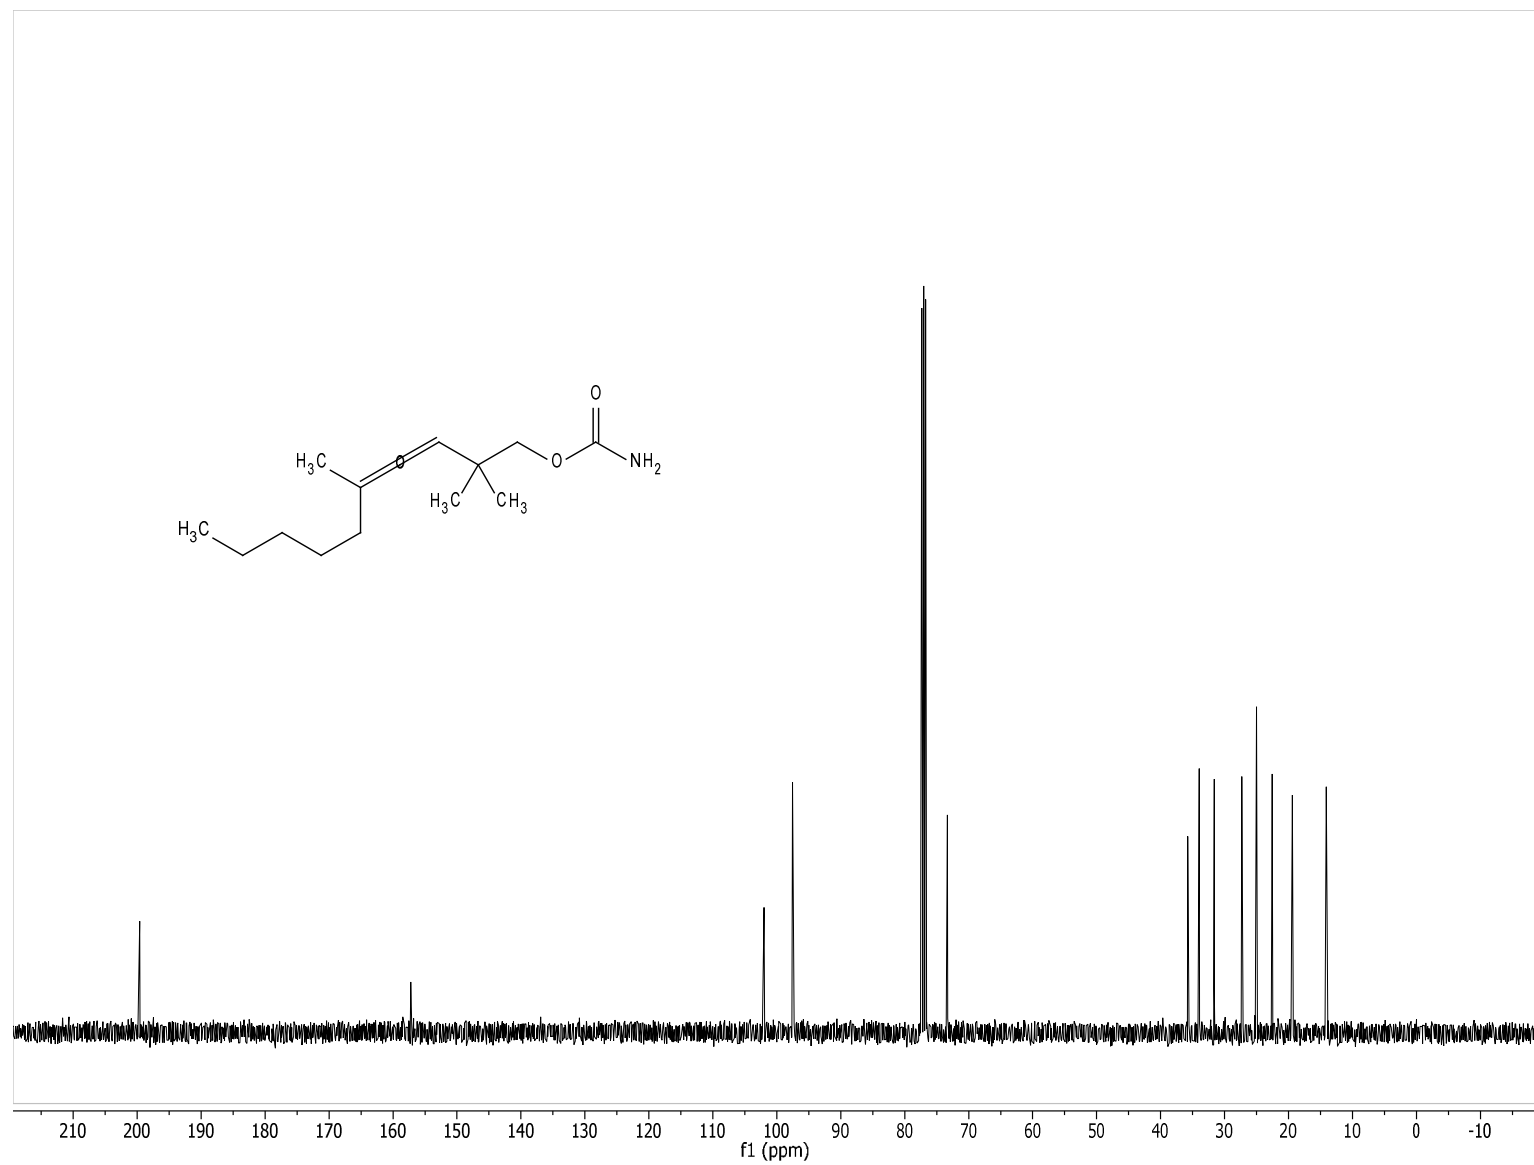

Compound 7c.

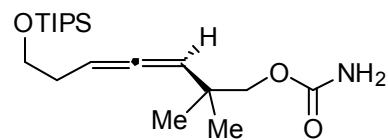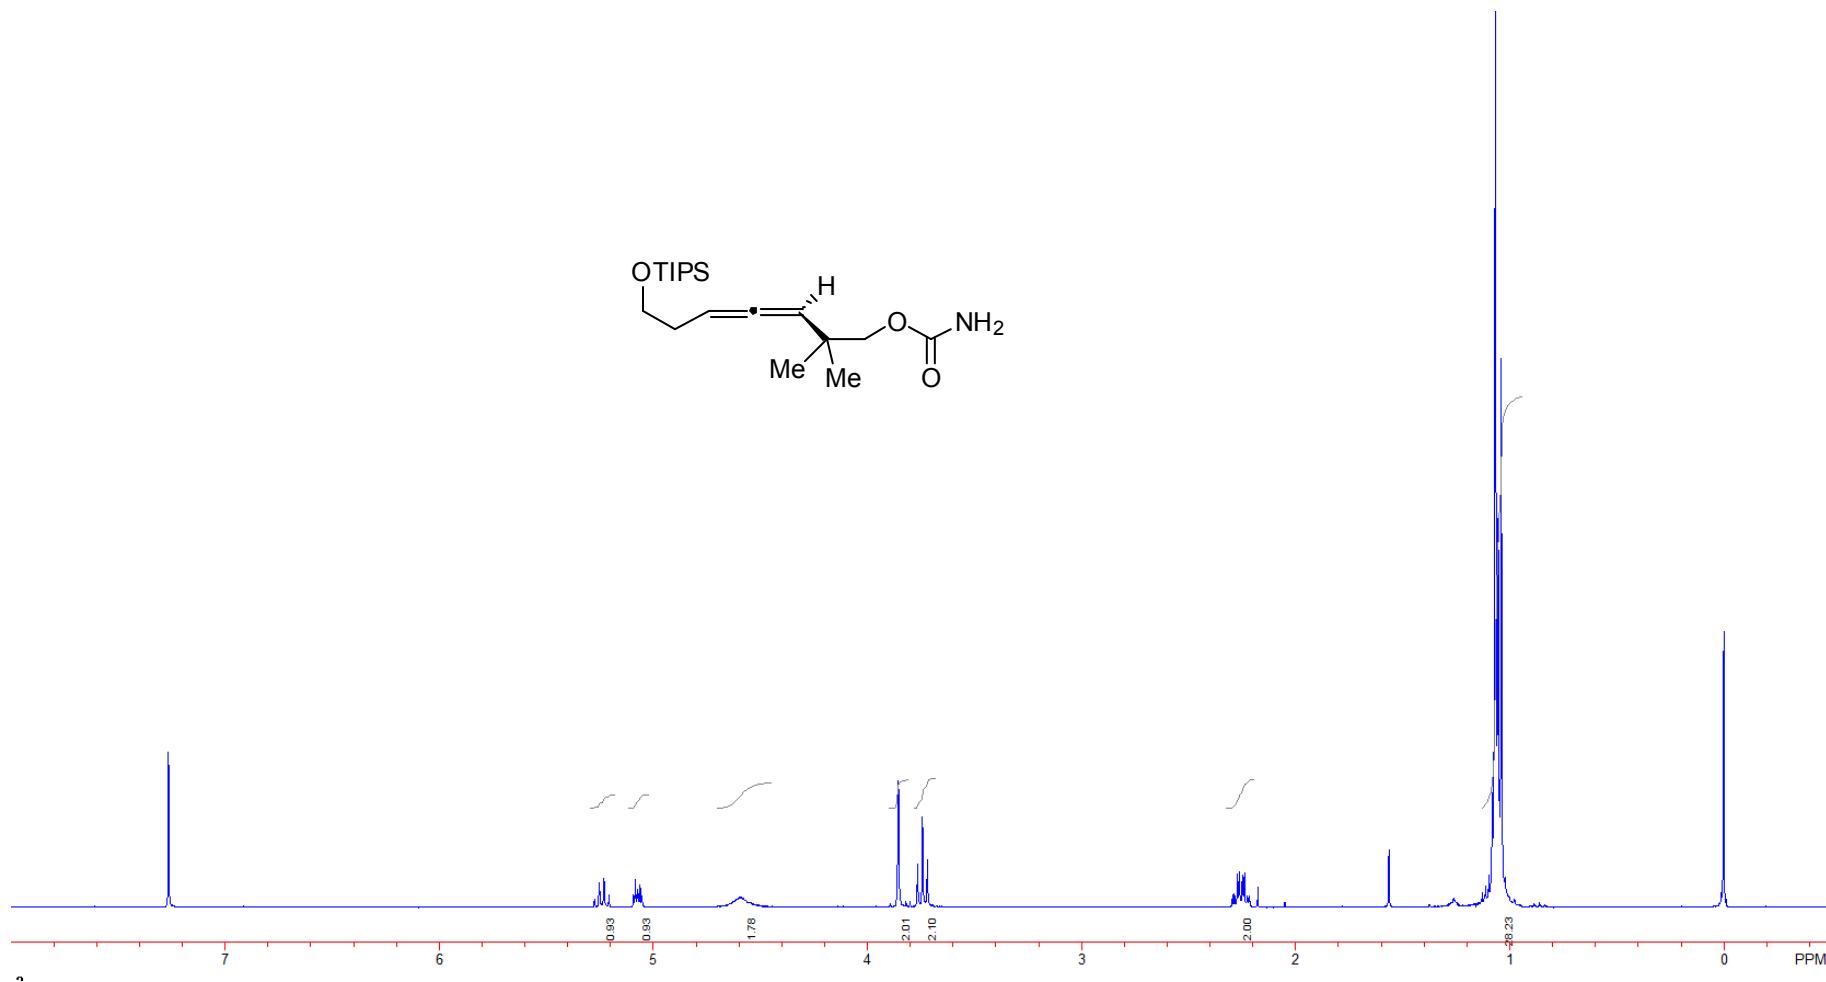

**Compound 7c.**

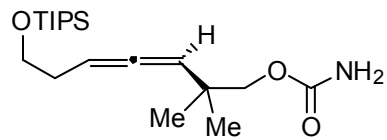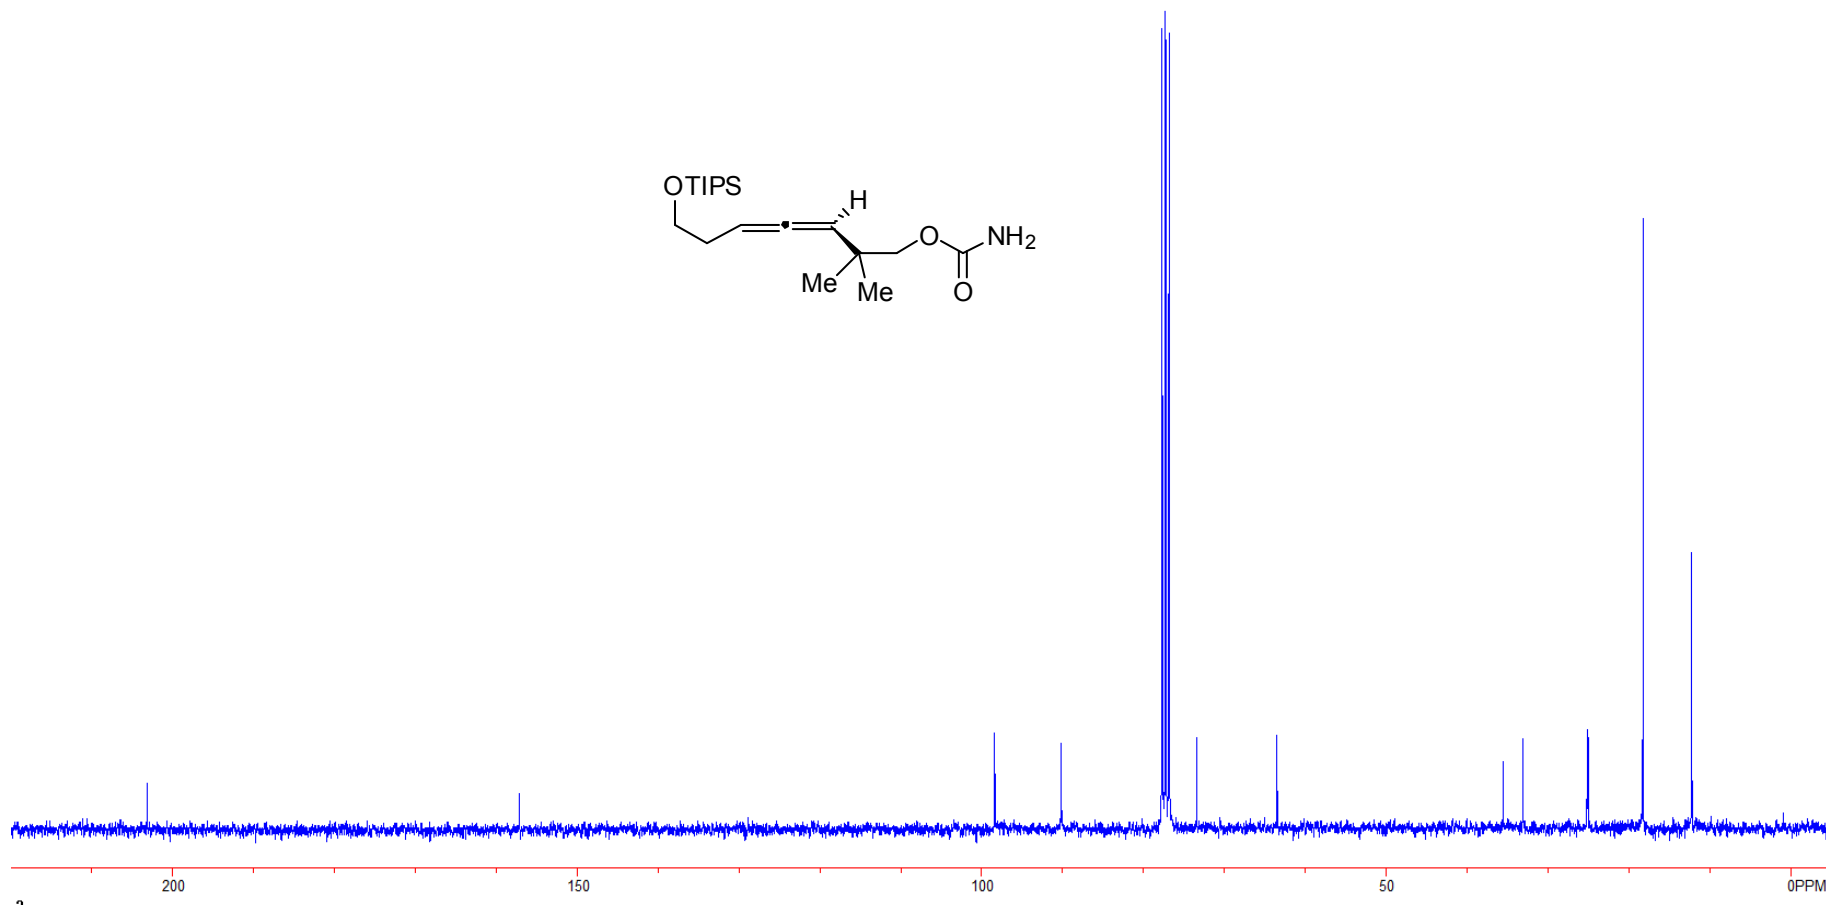

Compound 7d.

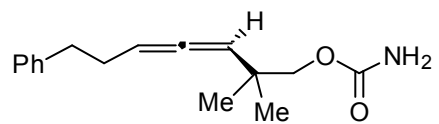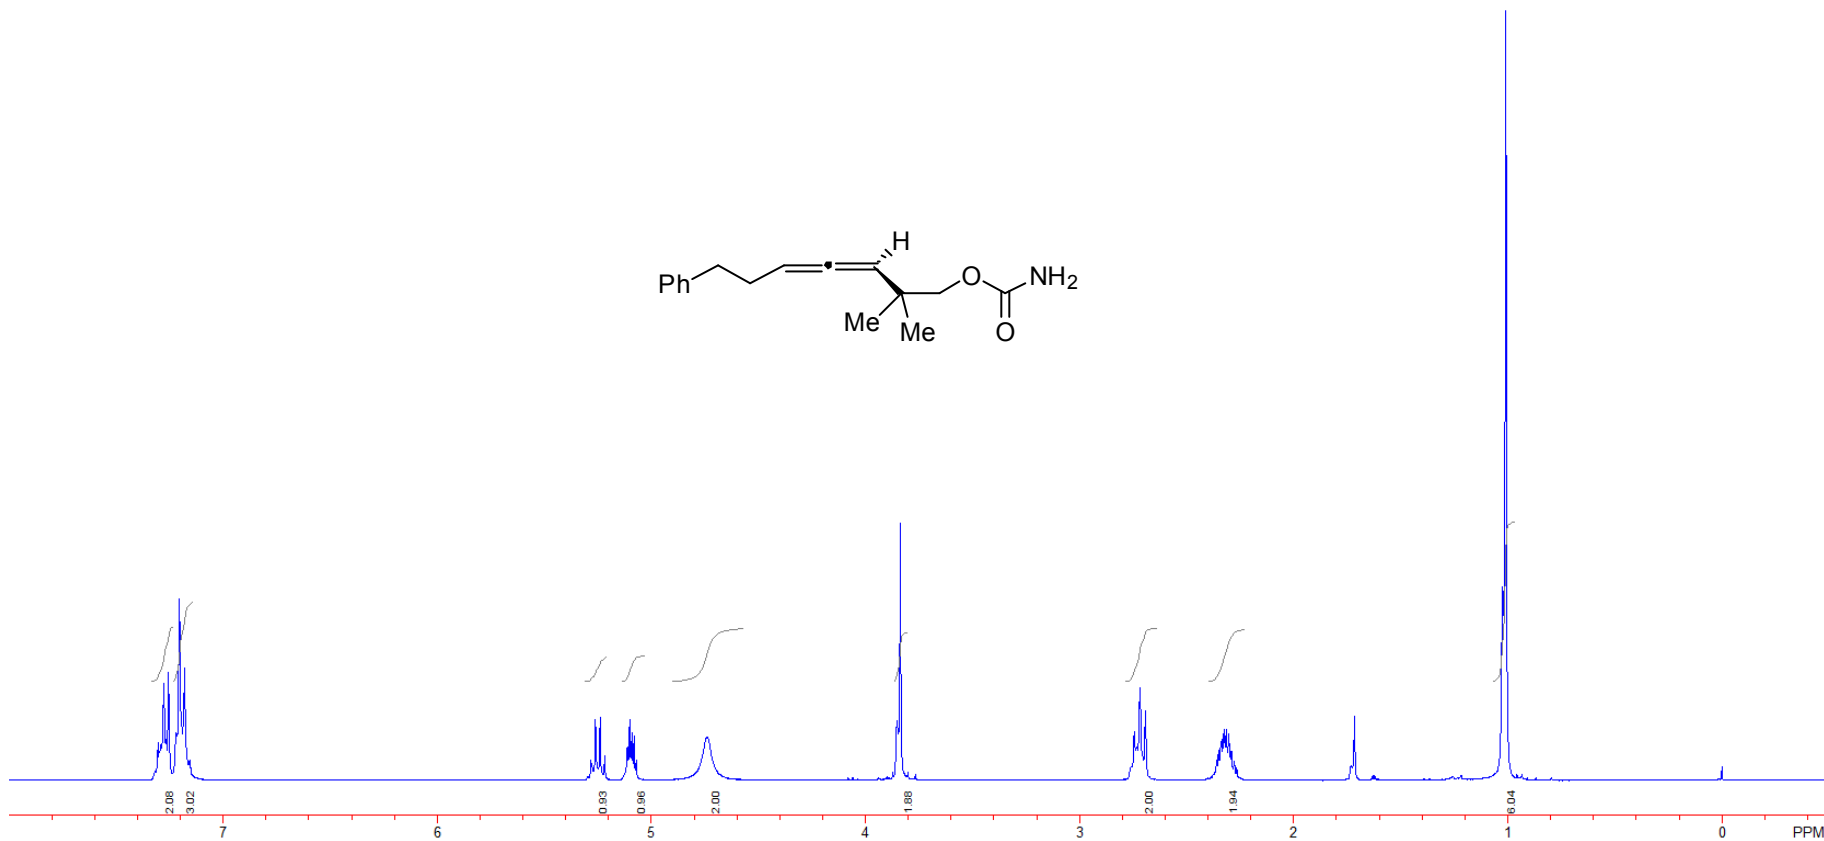





Compound 7e.

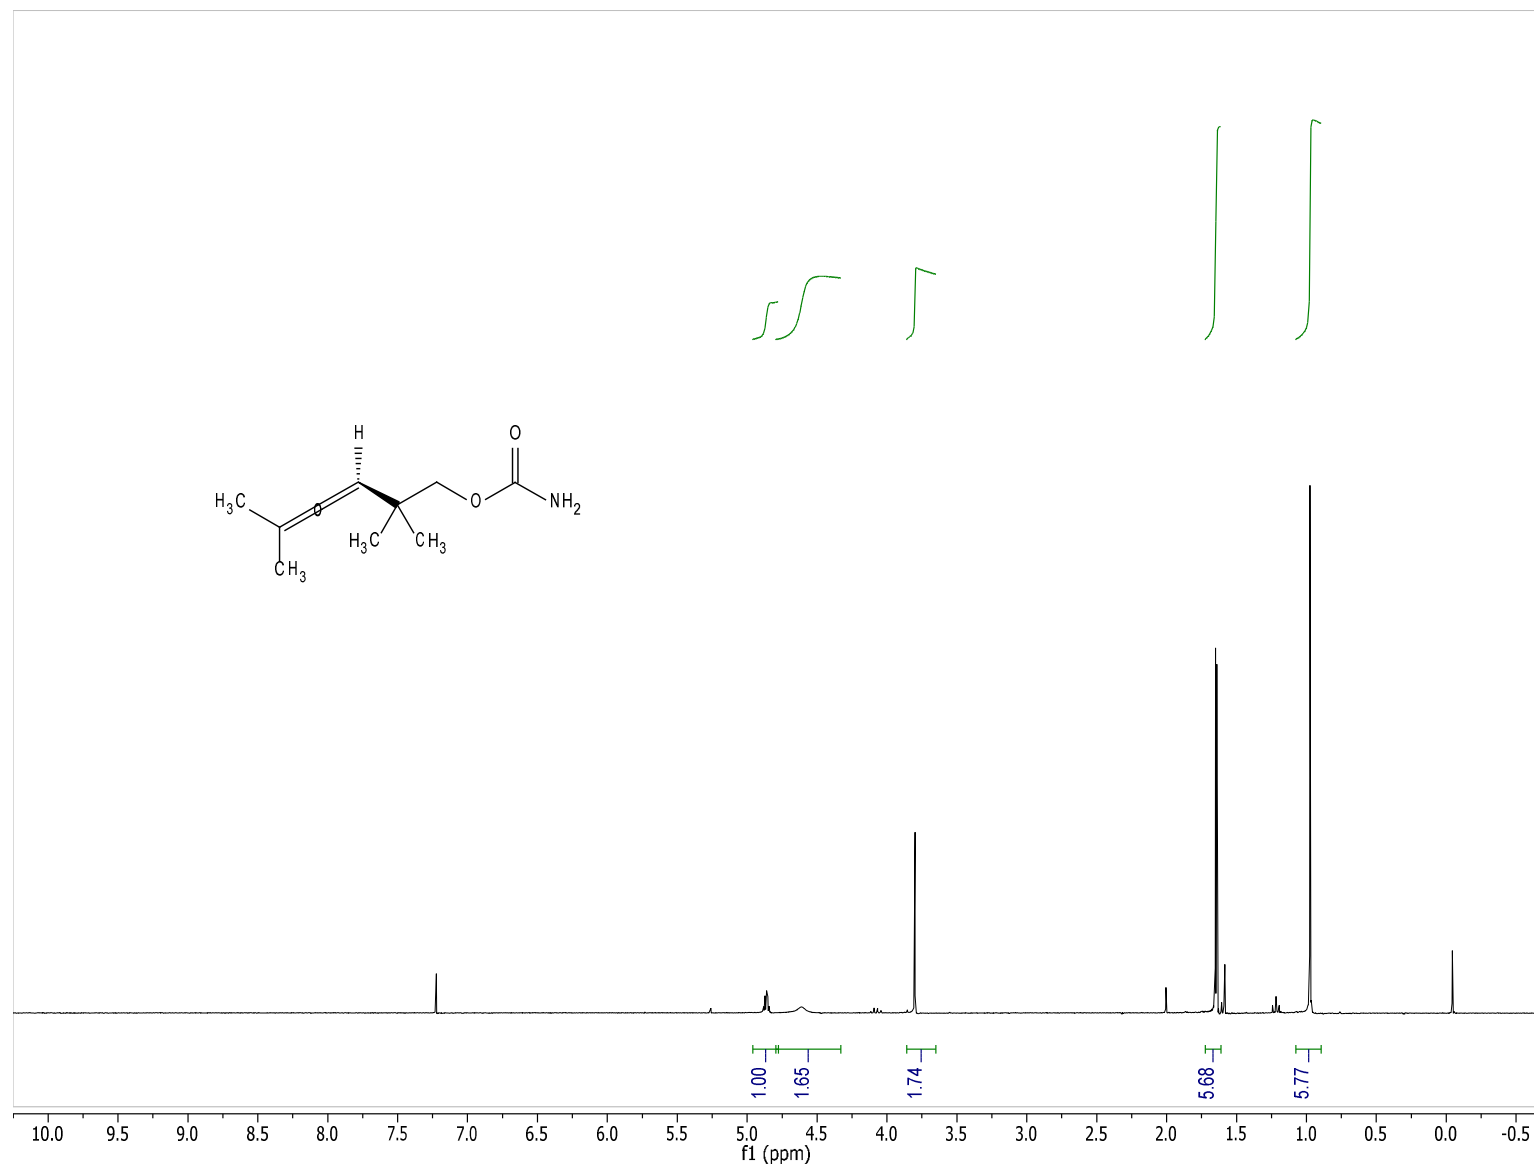

Compound 7e.

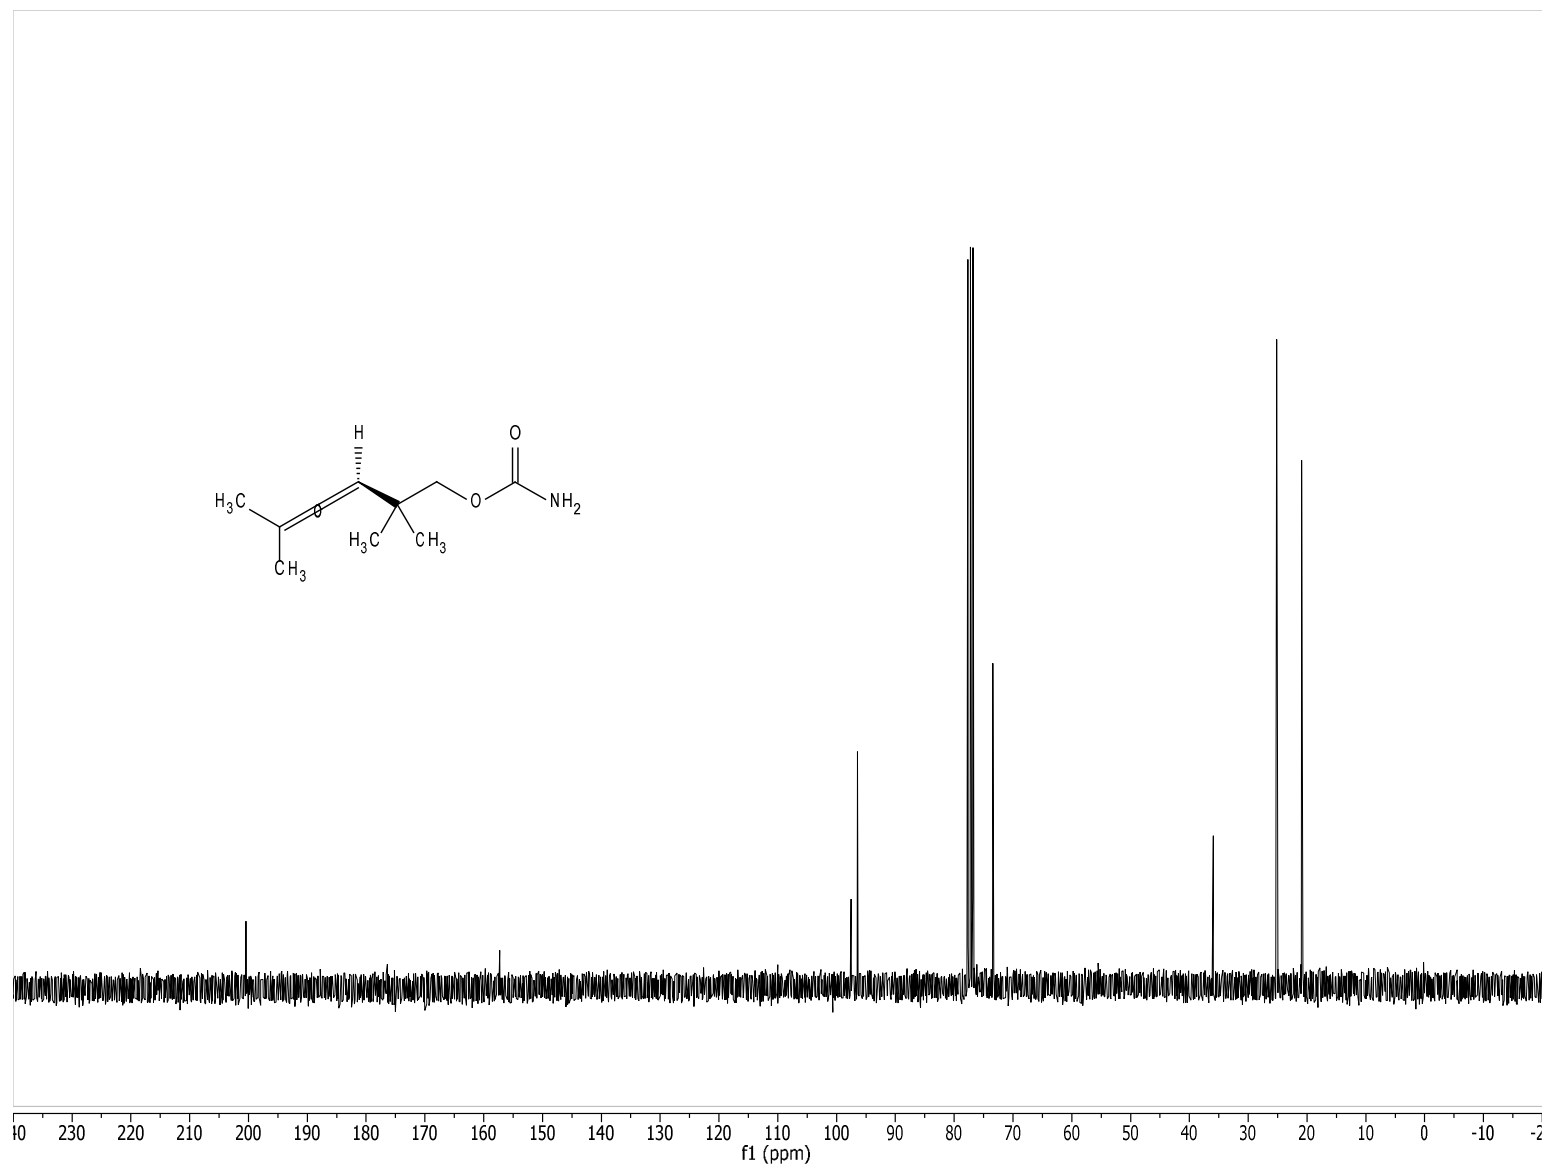

**Compound 7f.**

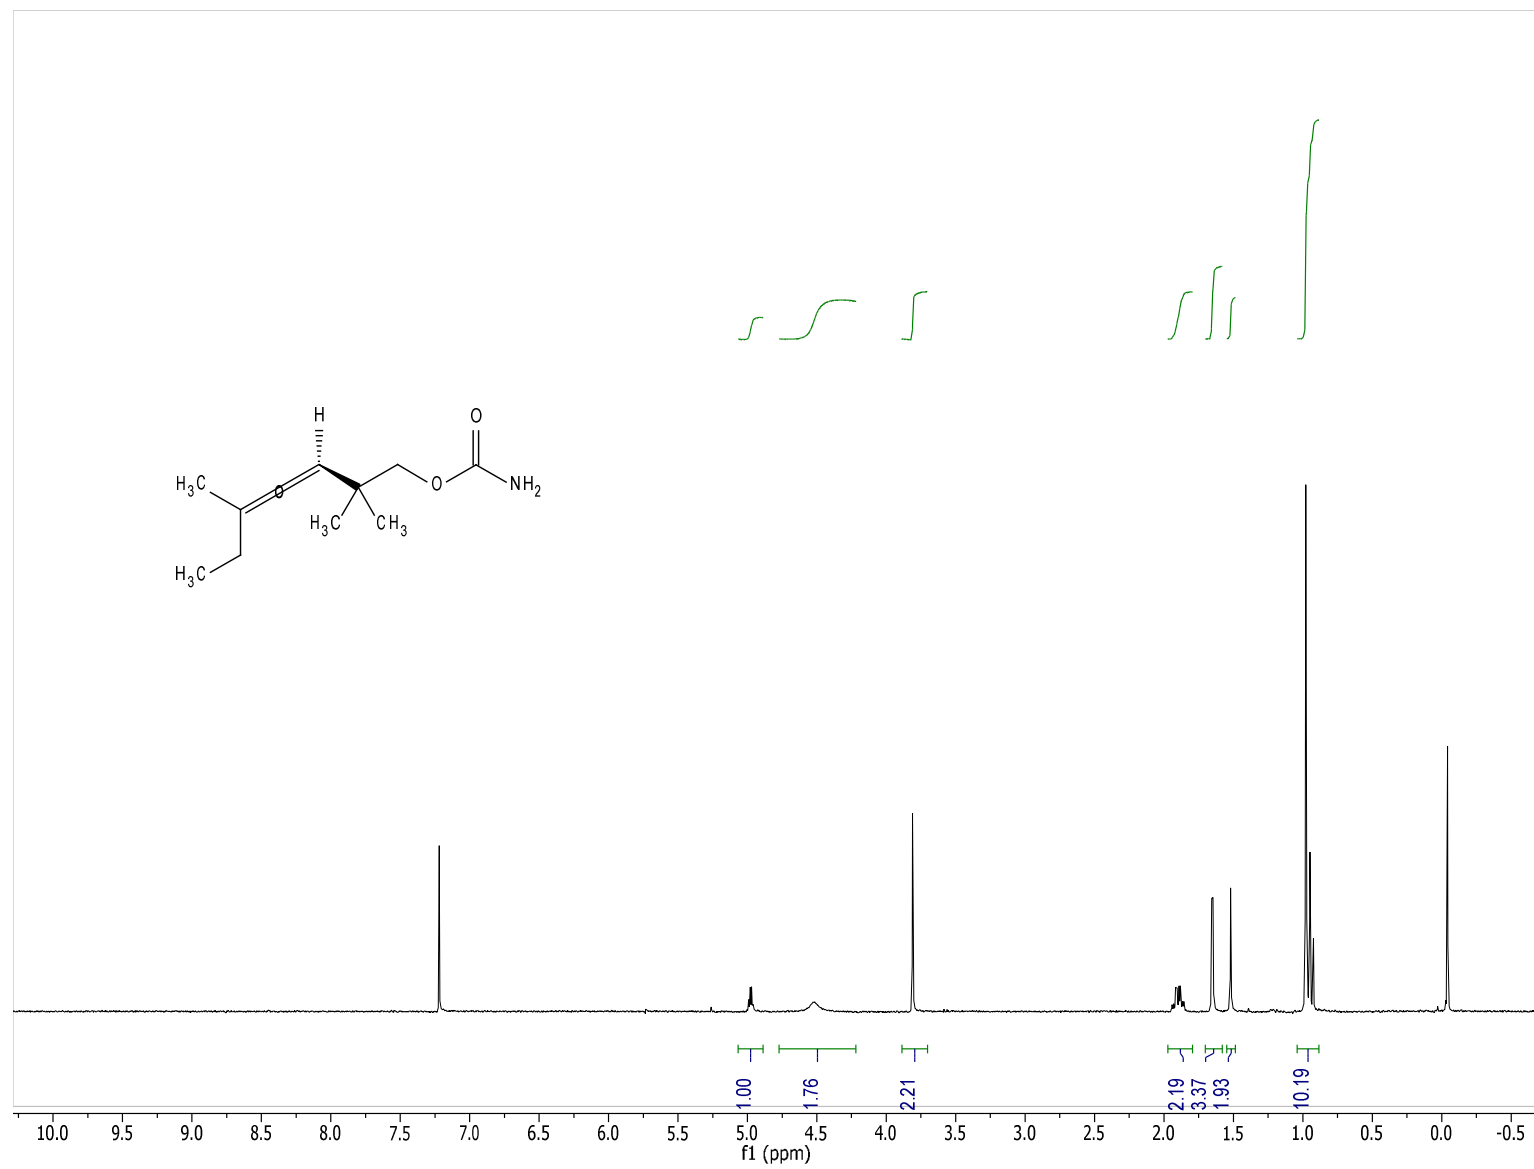

**Compound 7f.**

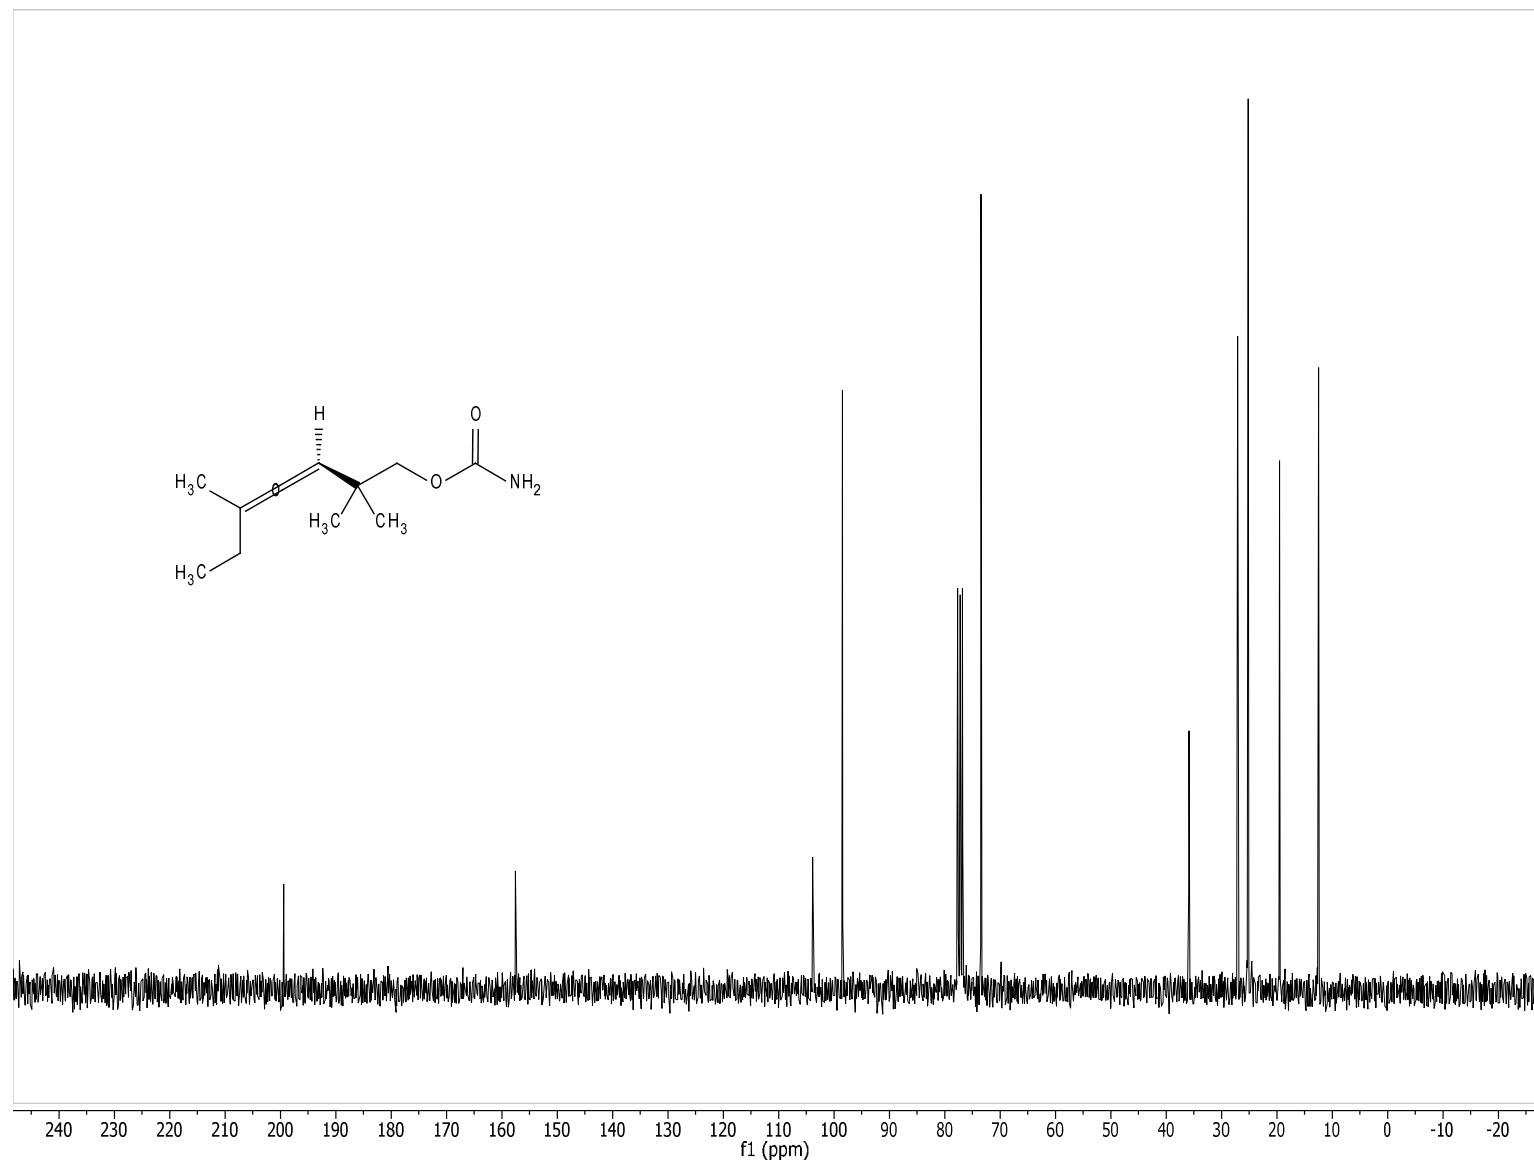

Compound 7g.

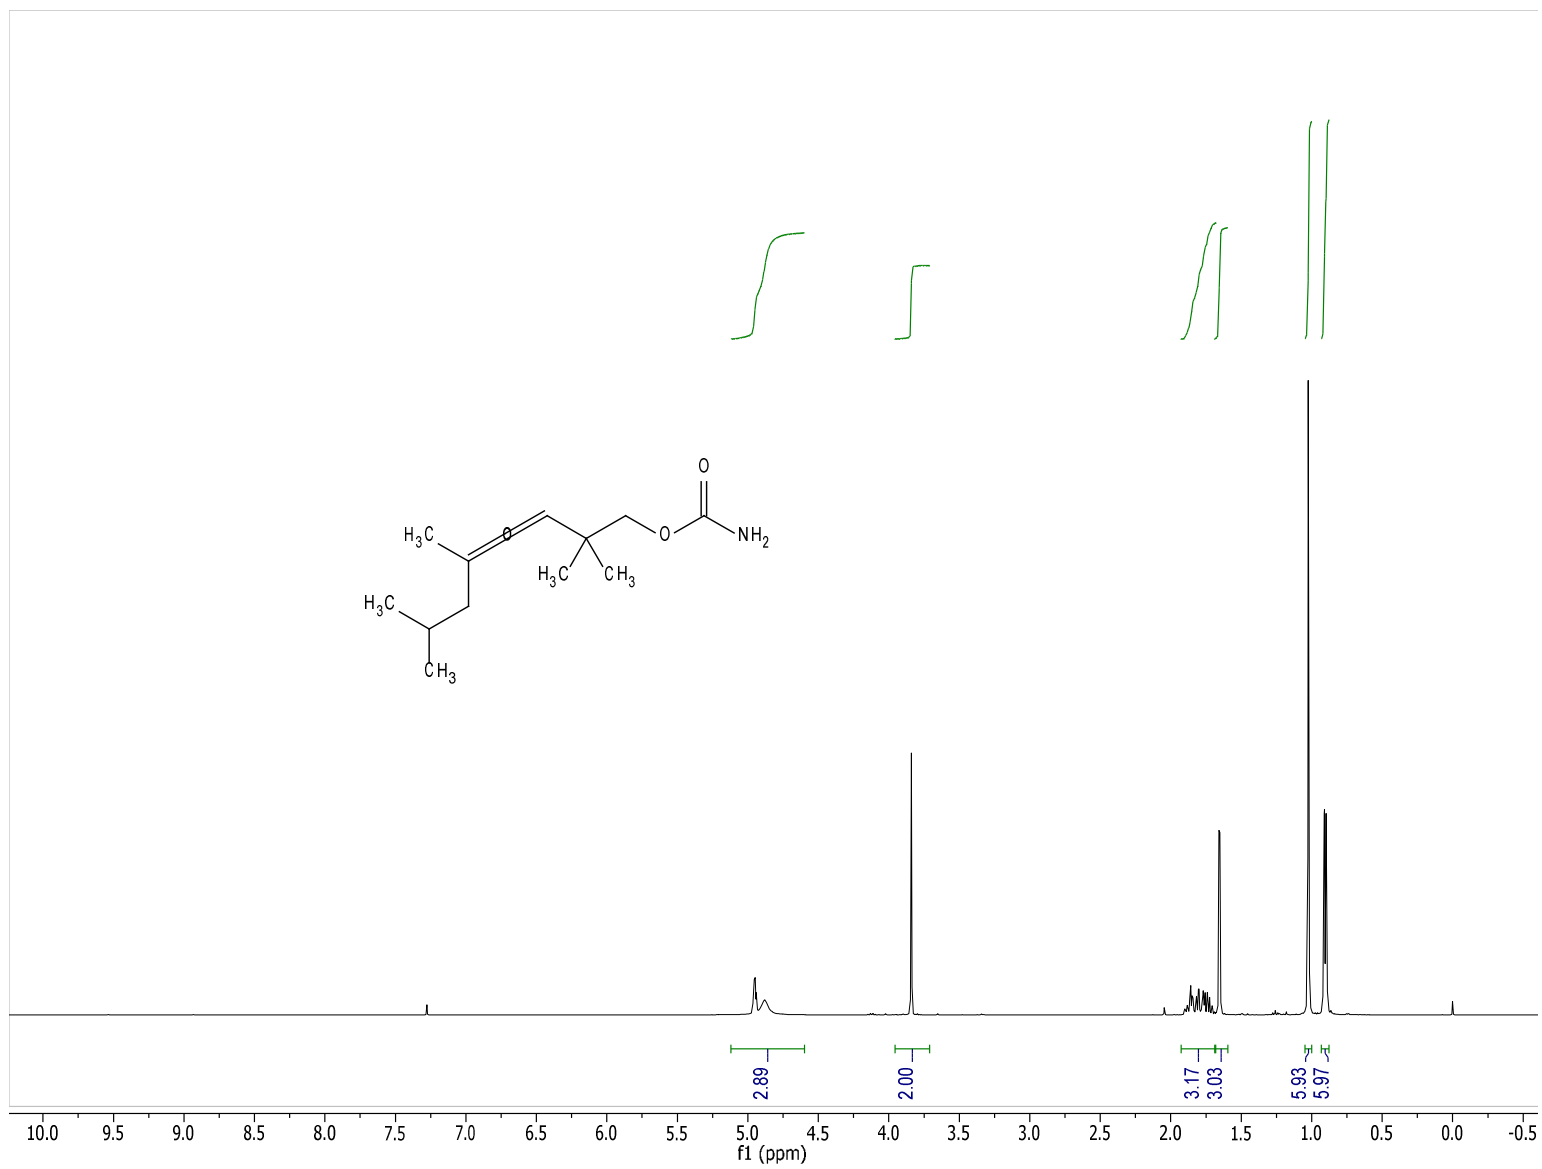

**Compound 7g.**

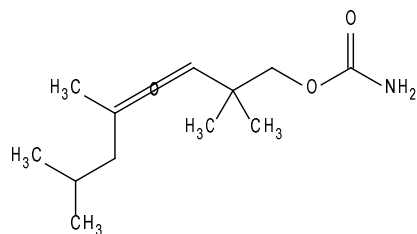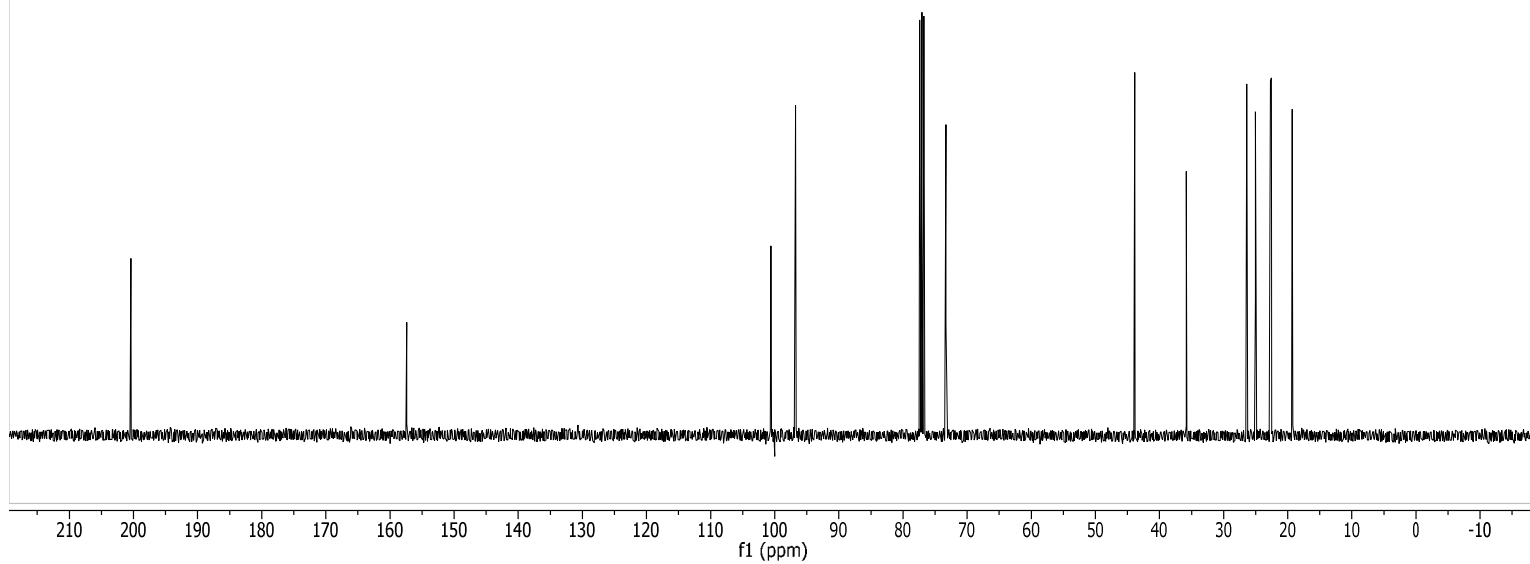

Compound 7l.

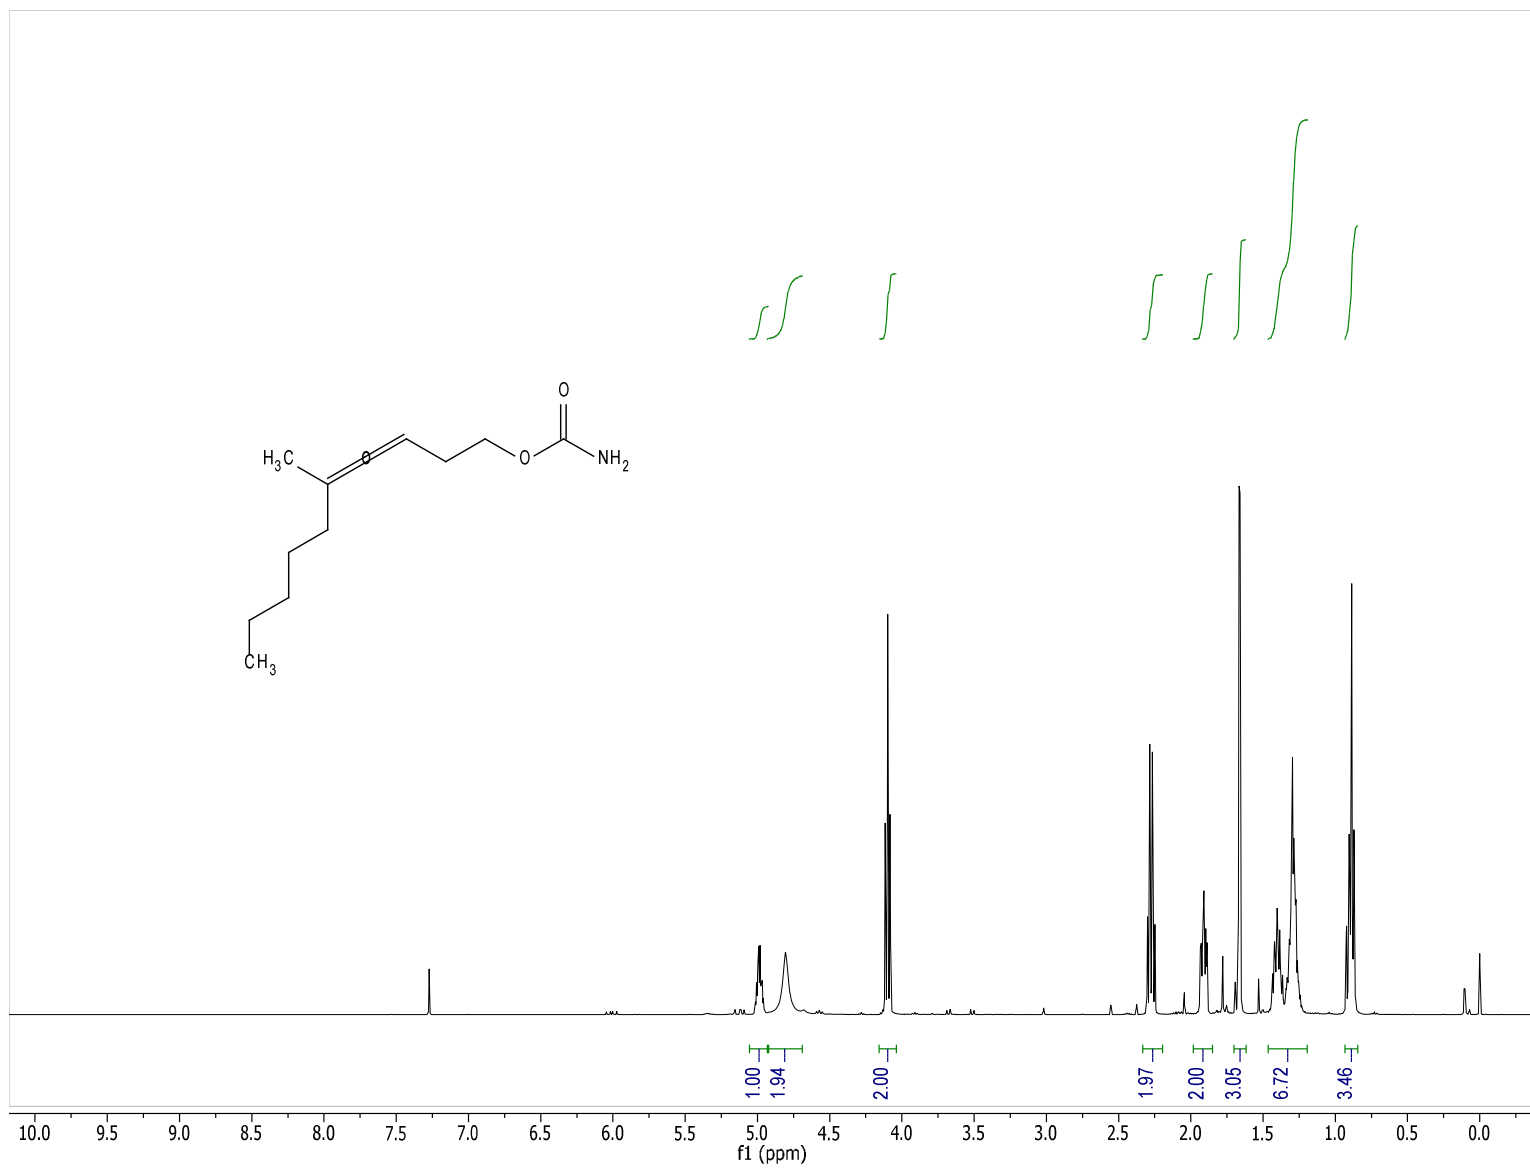



Compound 7l.

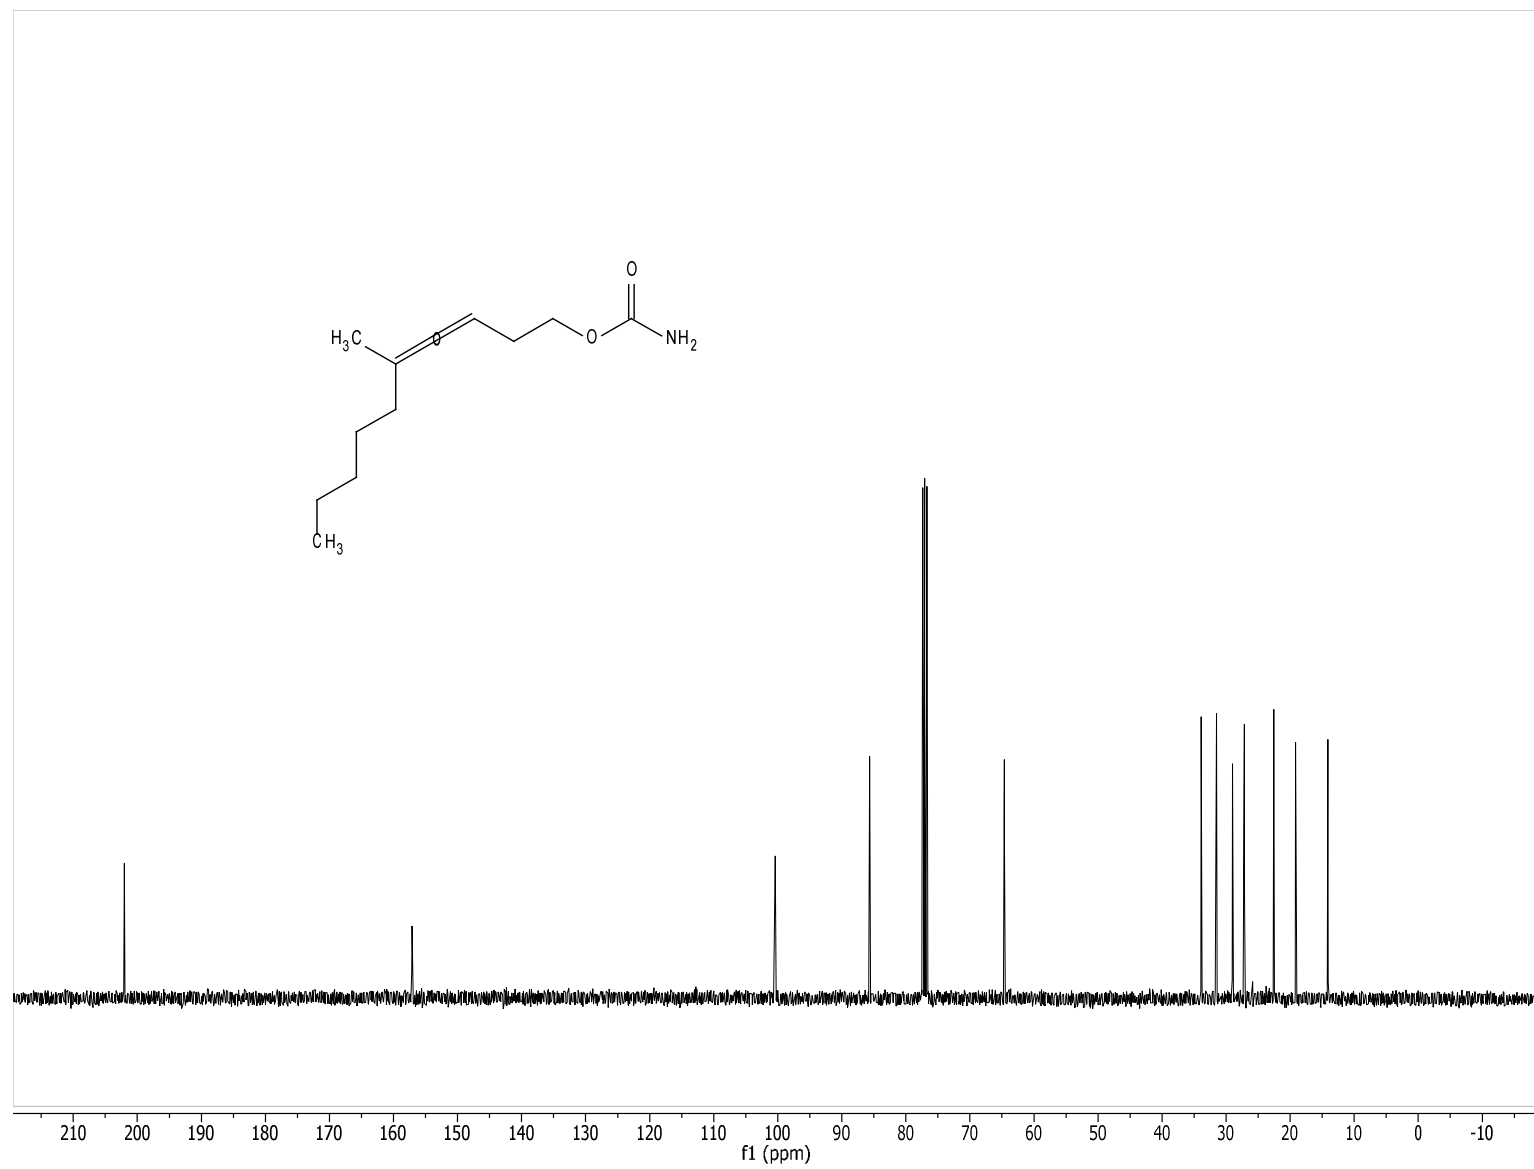

Compound 7m.

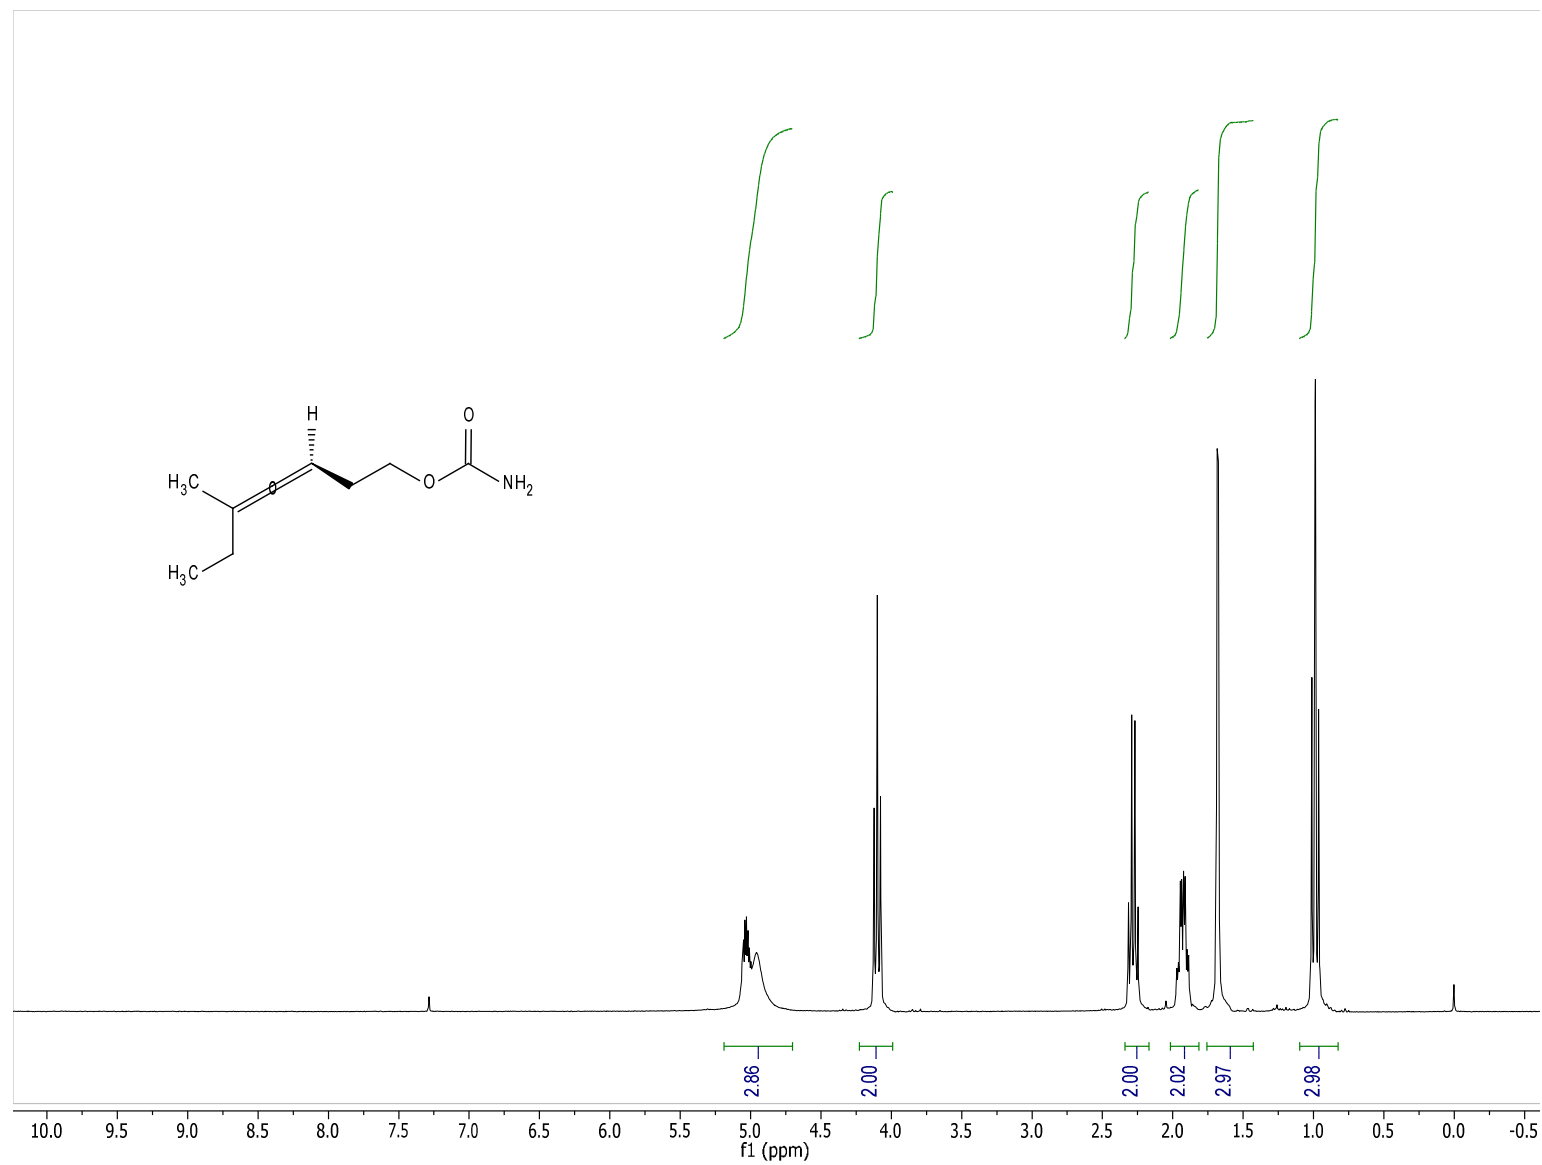

Compound 7m.

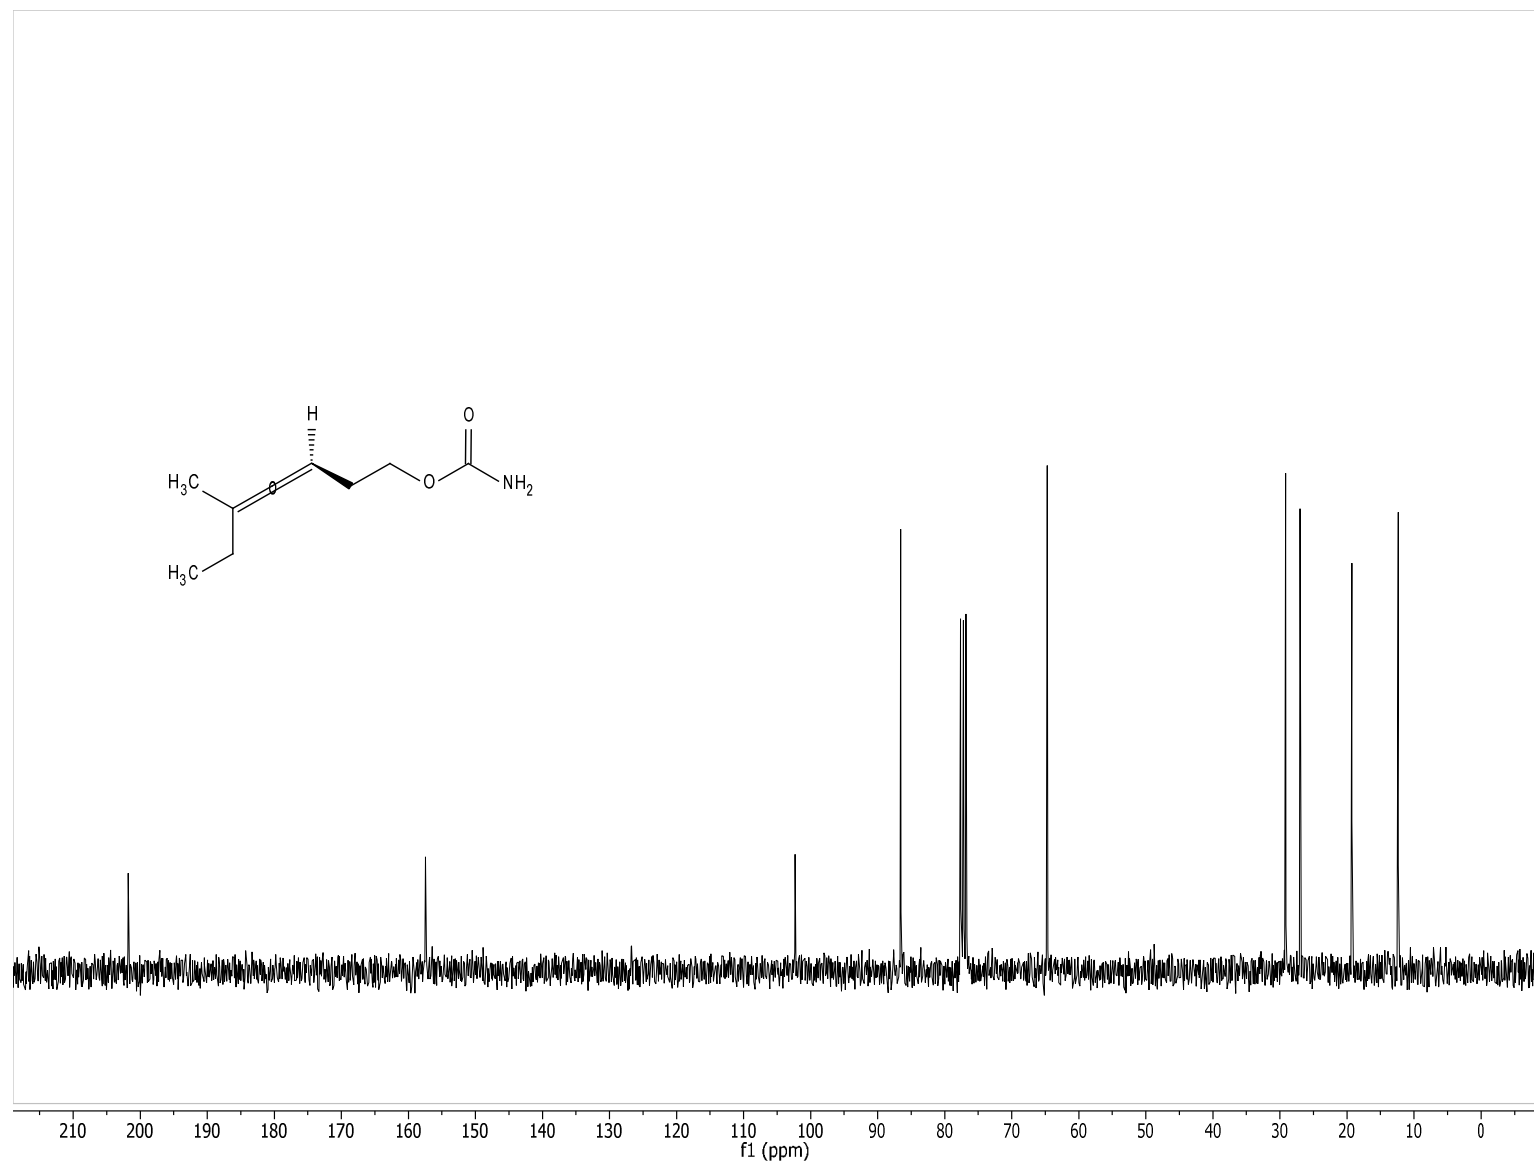

Compound 5a.

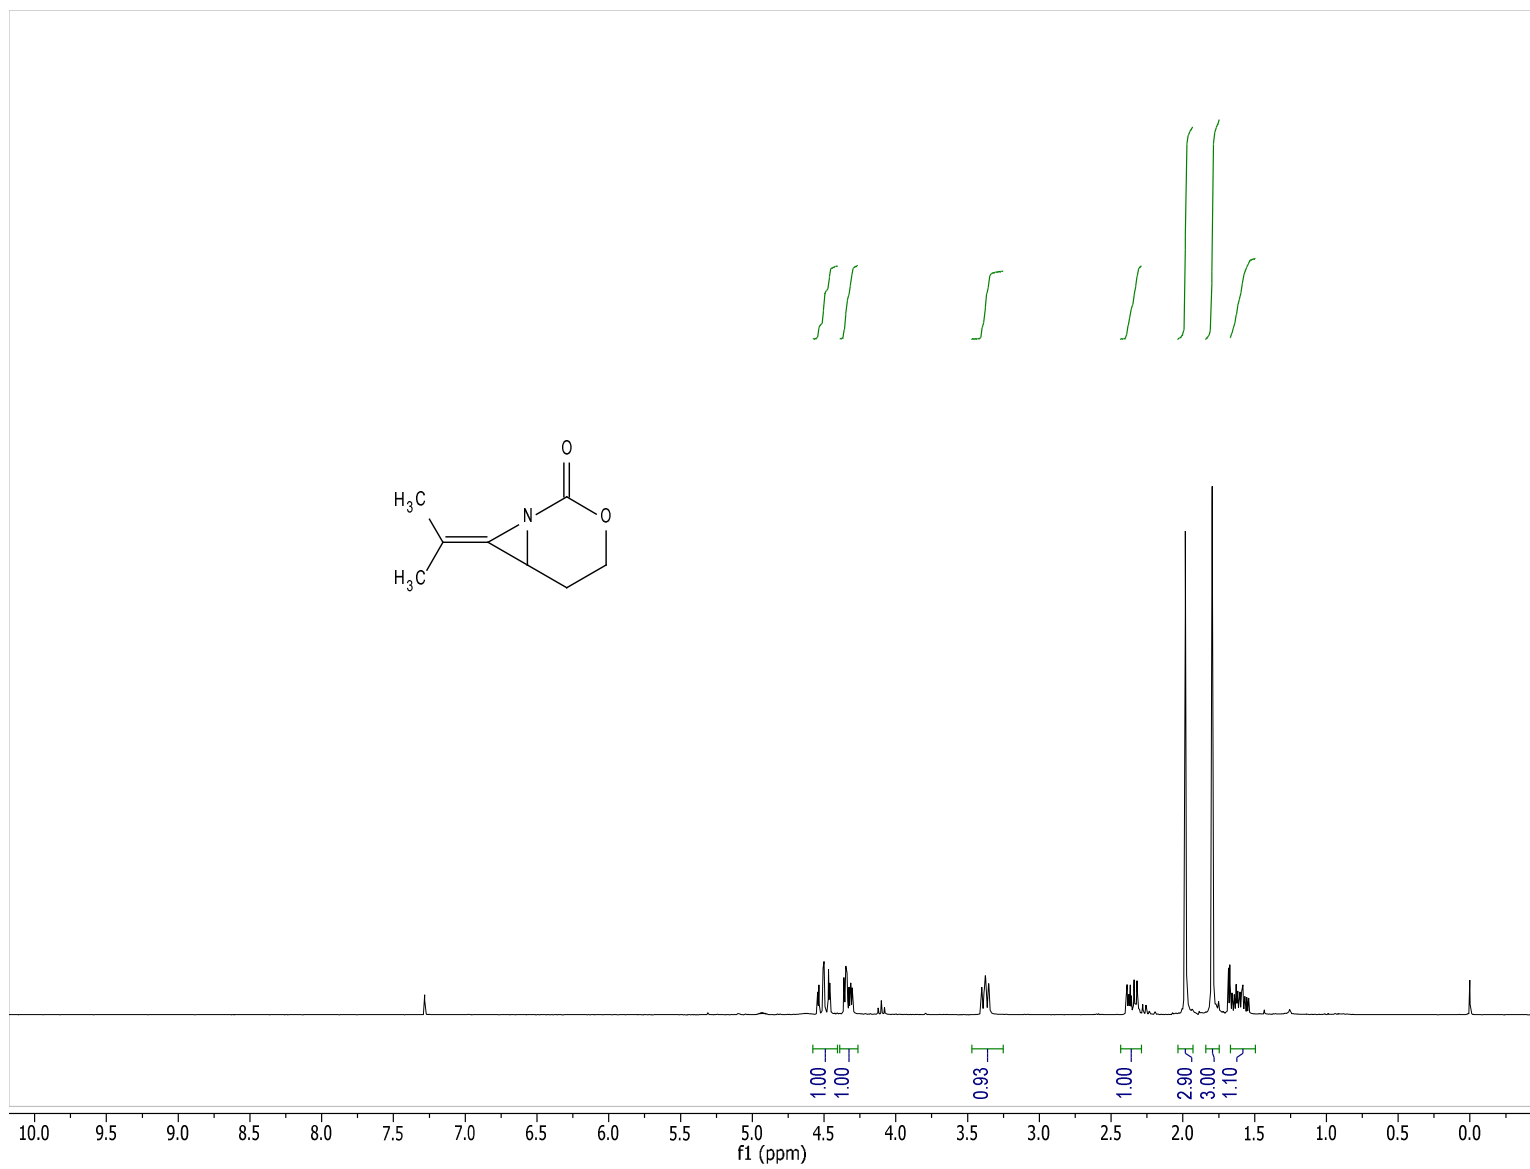

**Compound 5a.**

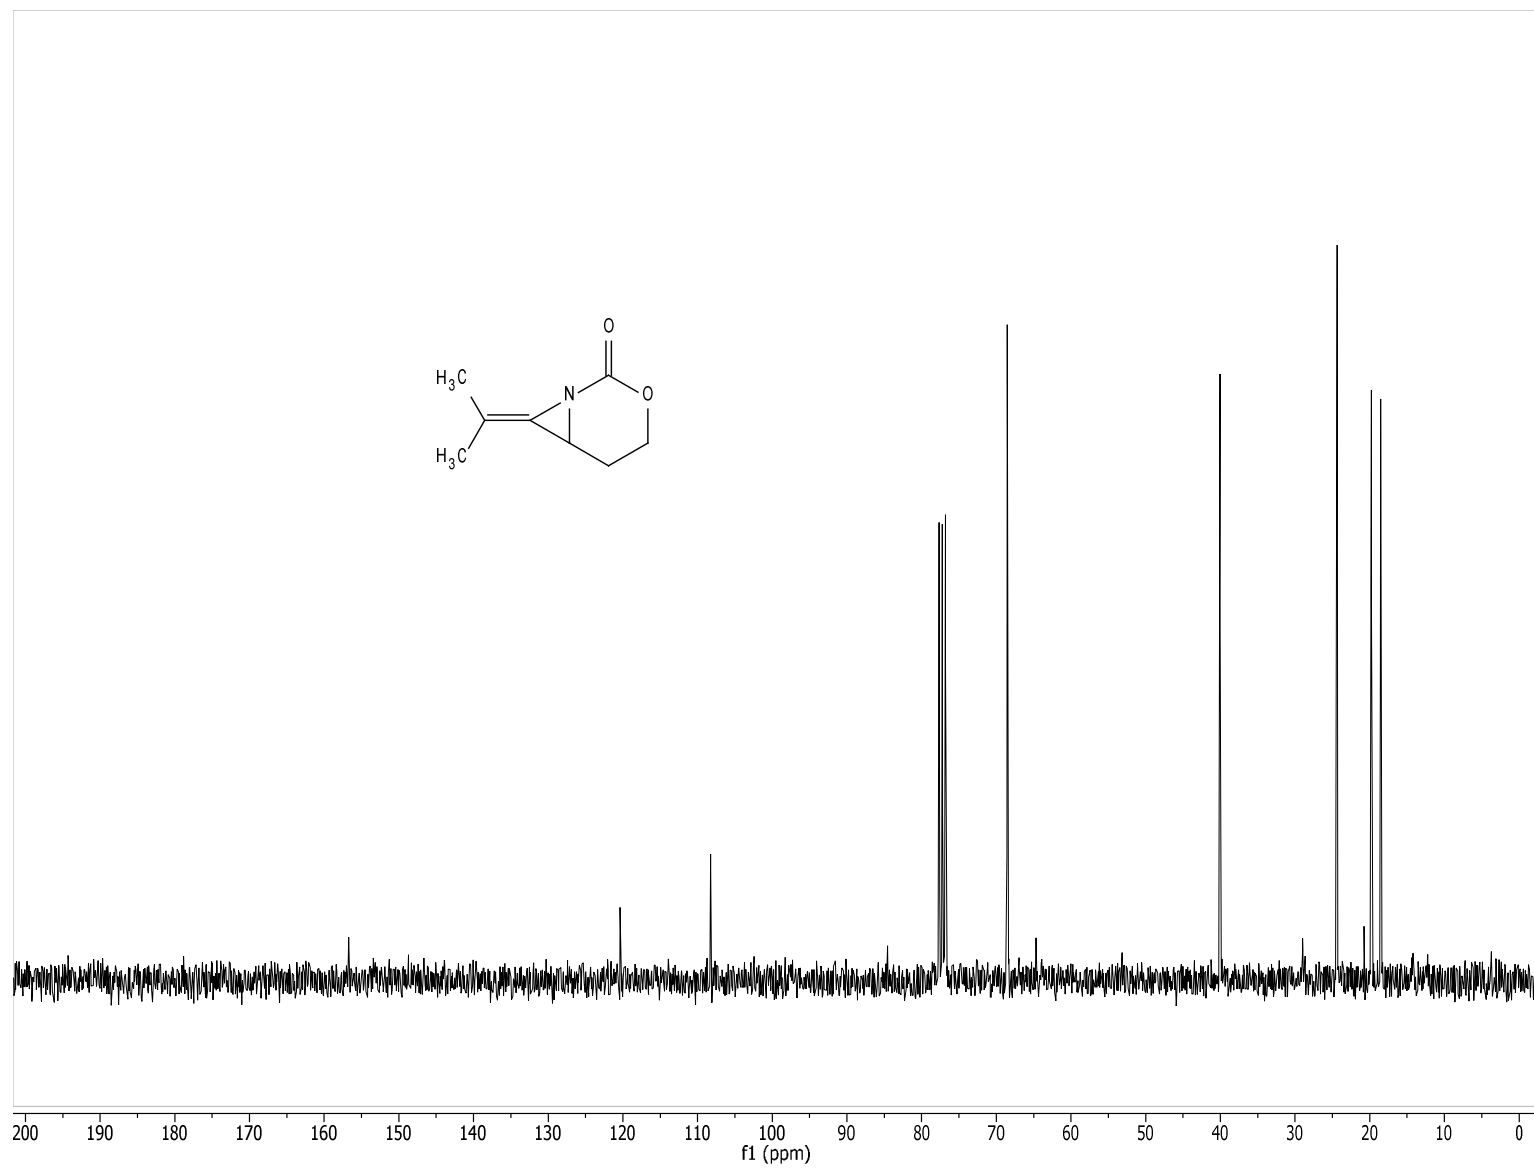

# Compound 5b.

R:/ac300/homer/BTV1029.002

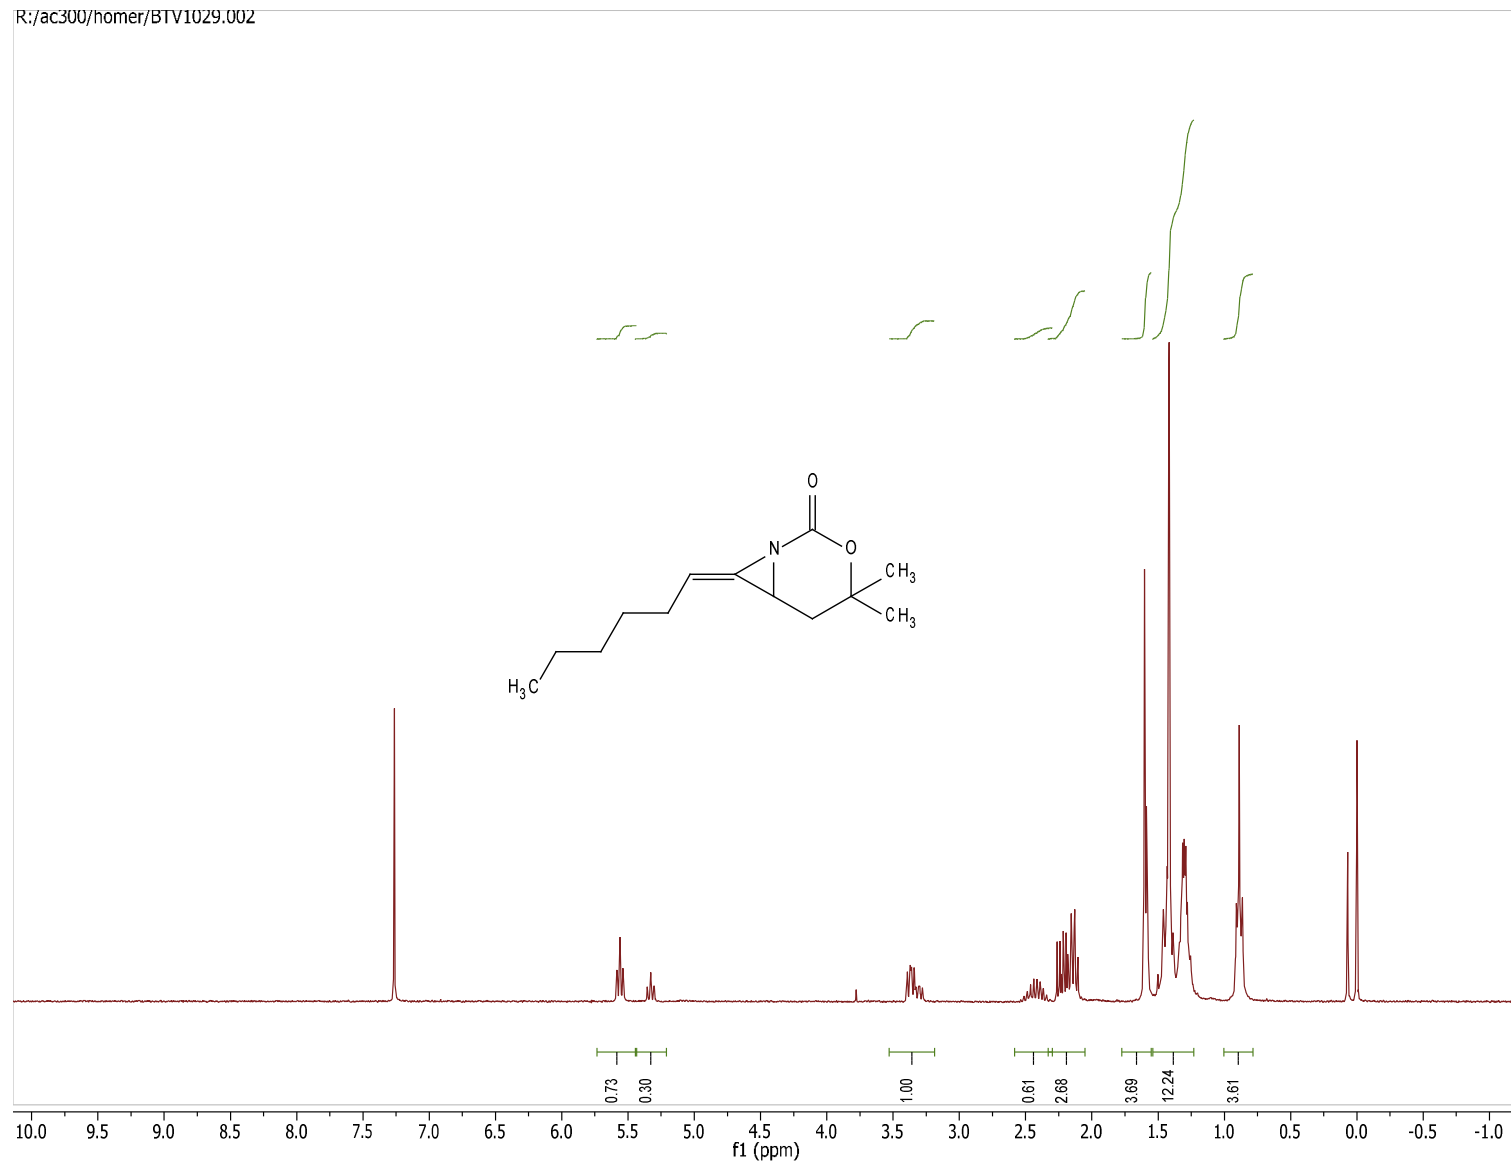

Compound 8a.

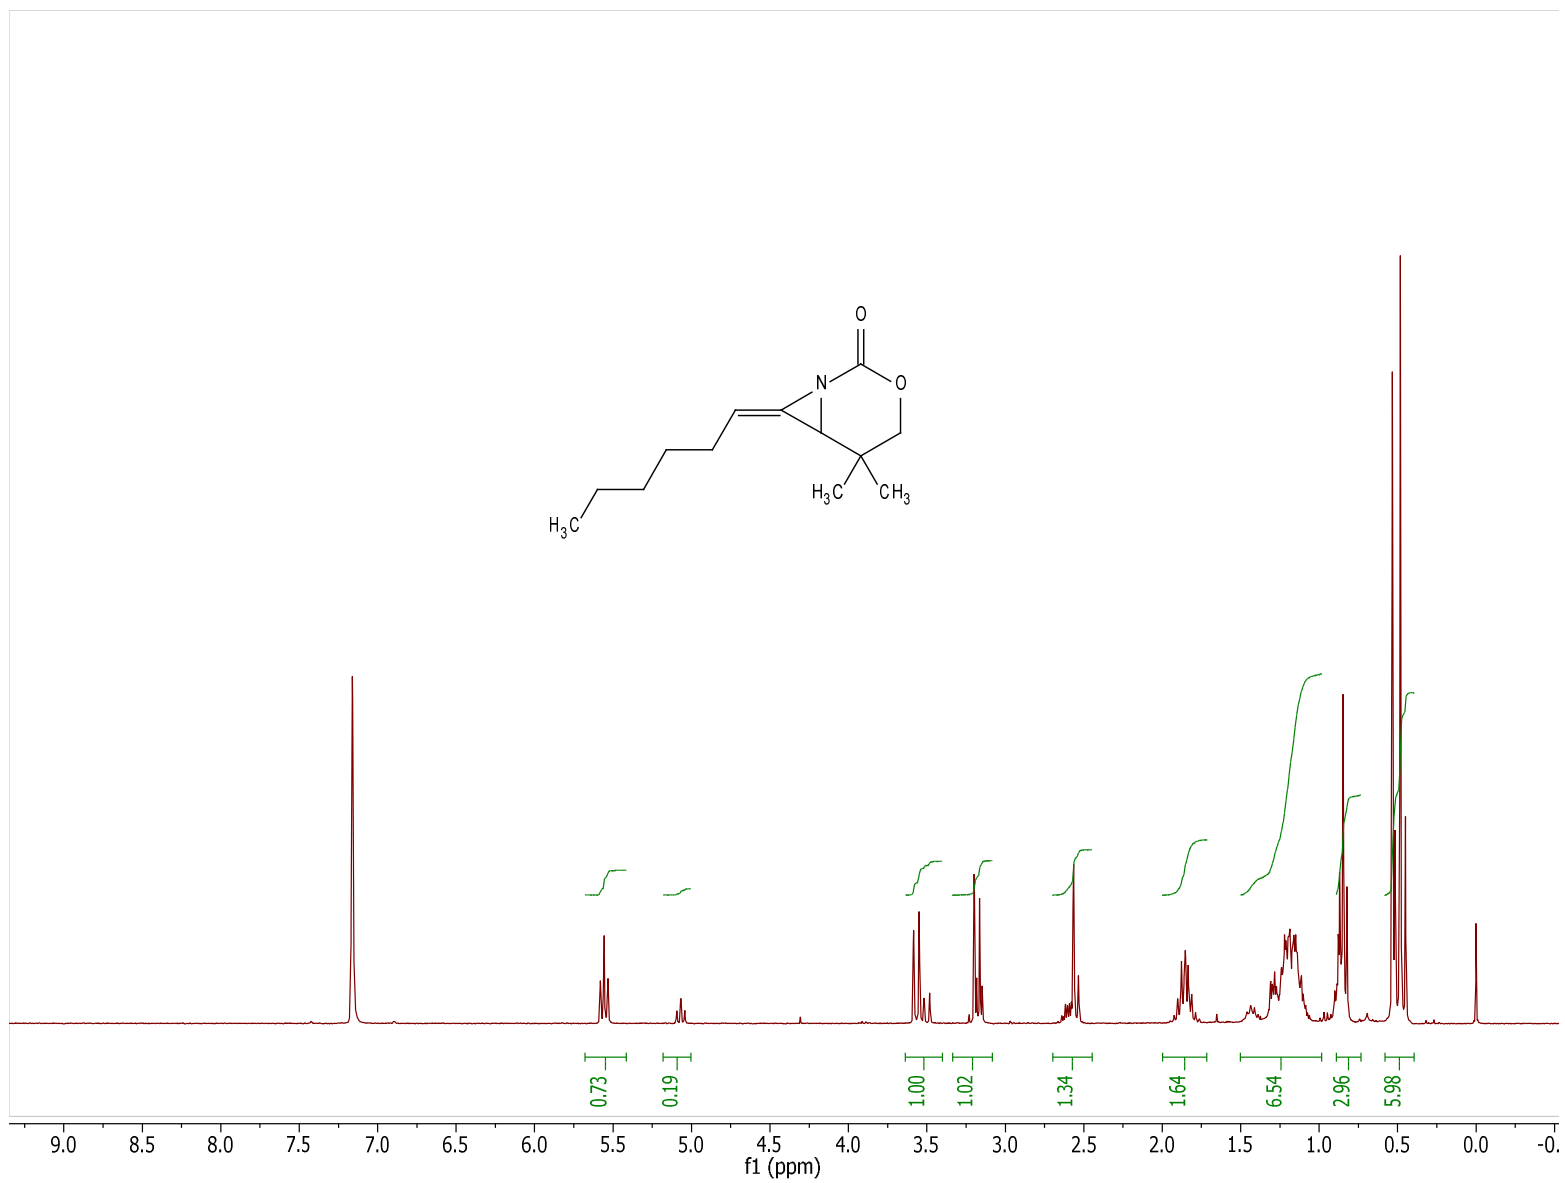

# Compound 8b.

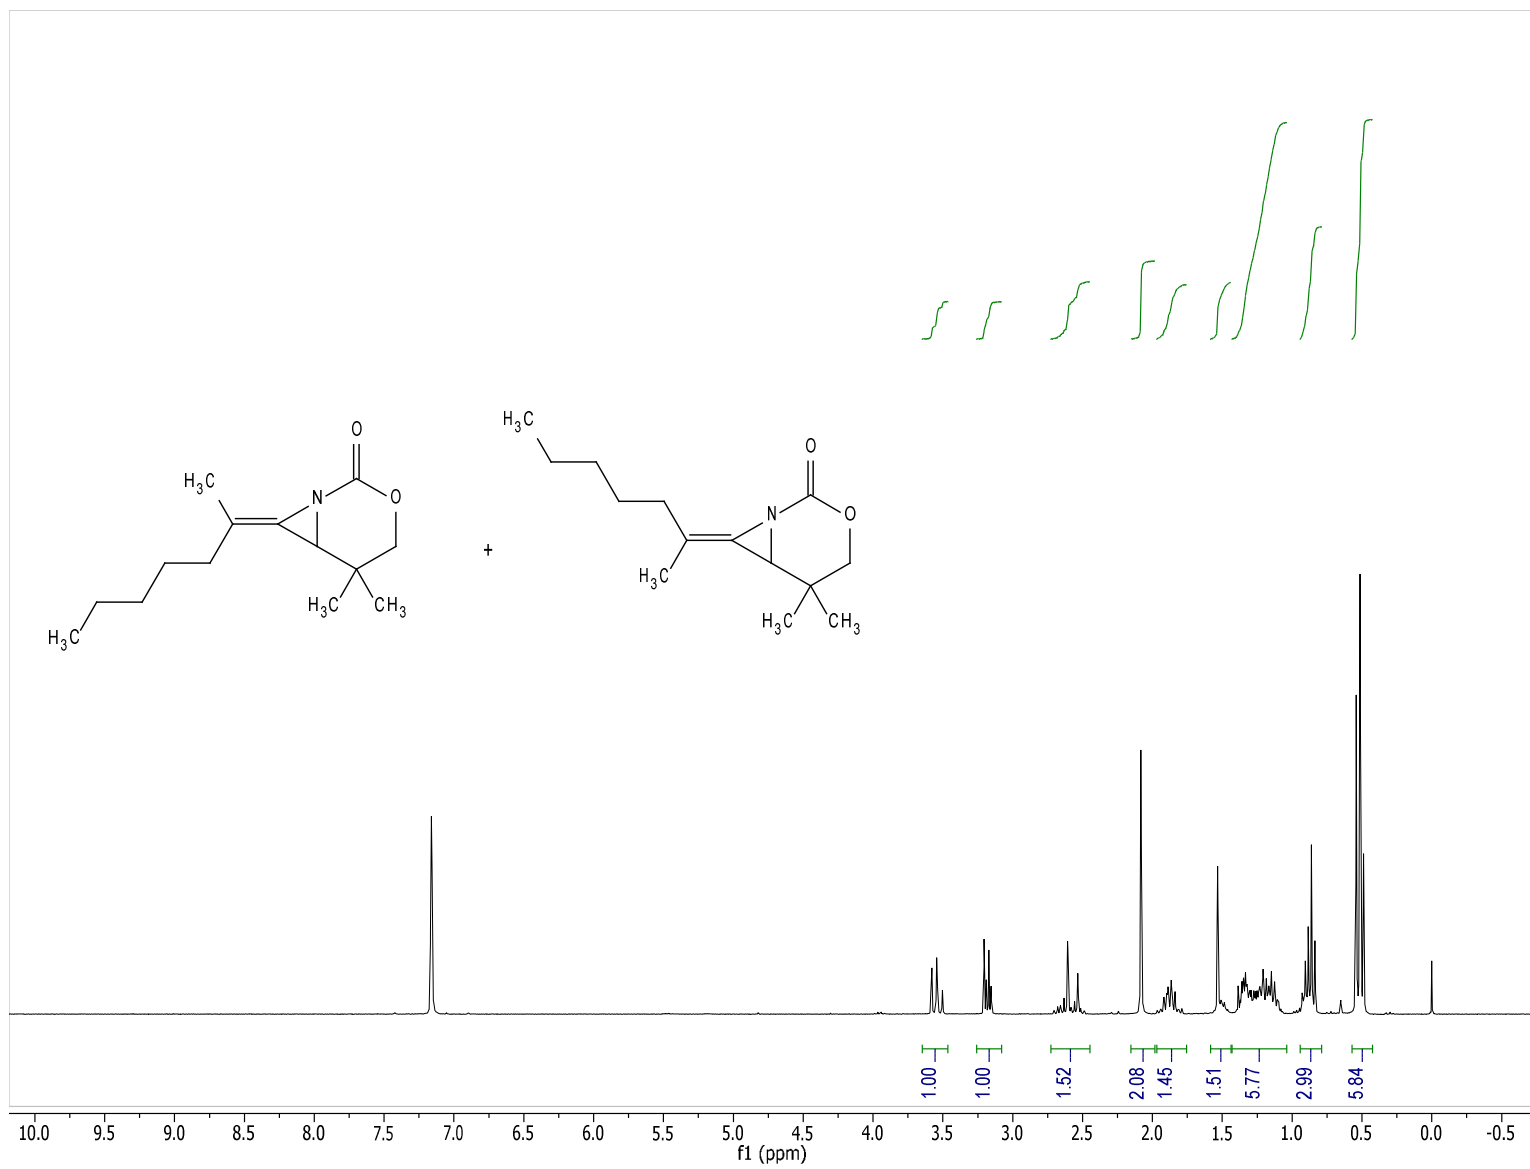



**Compound 8b.**

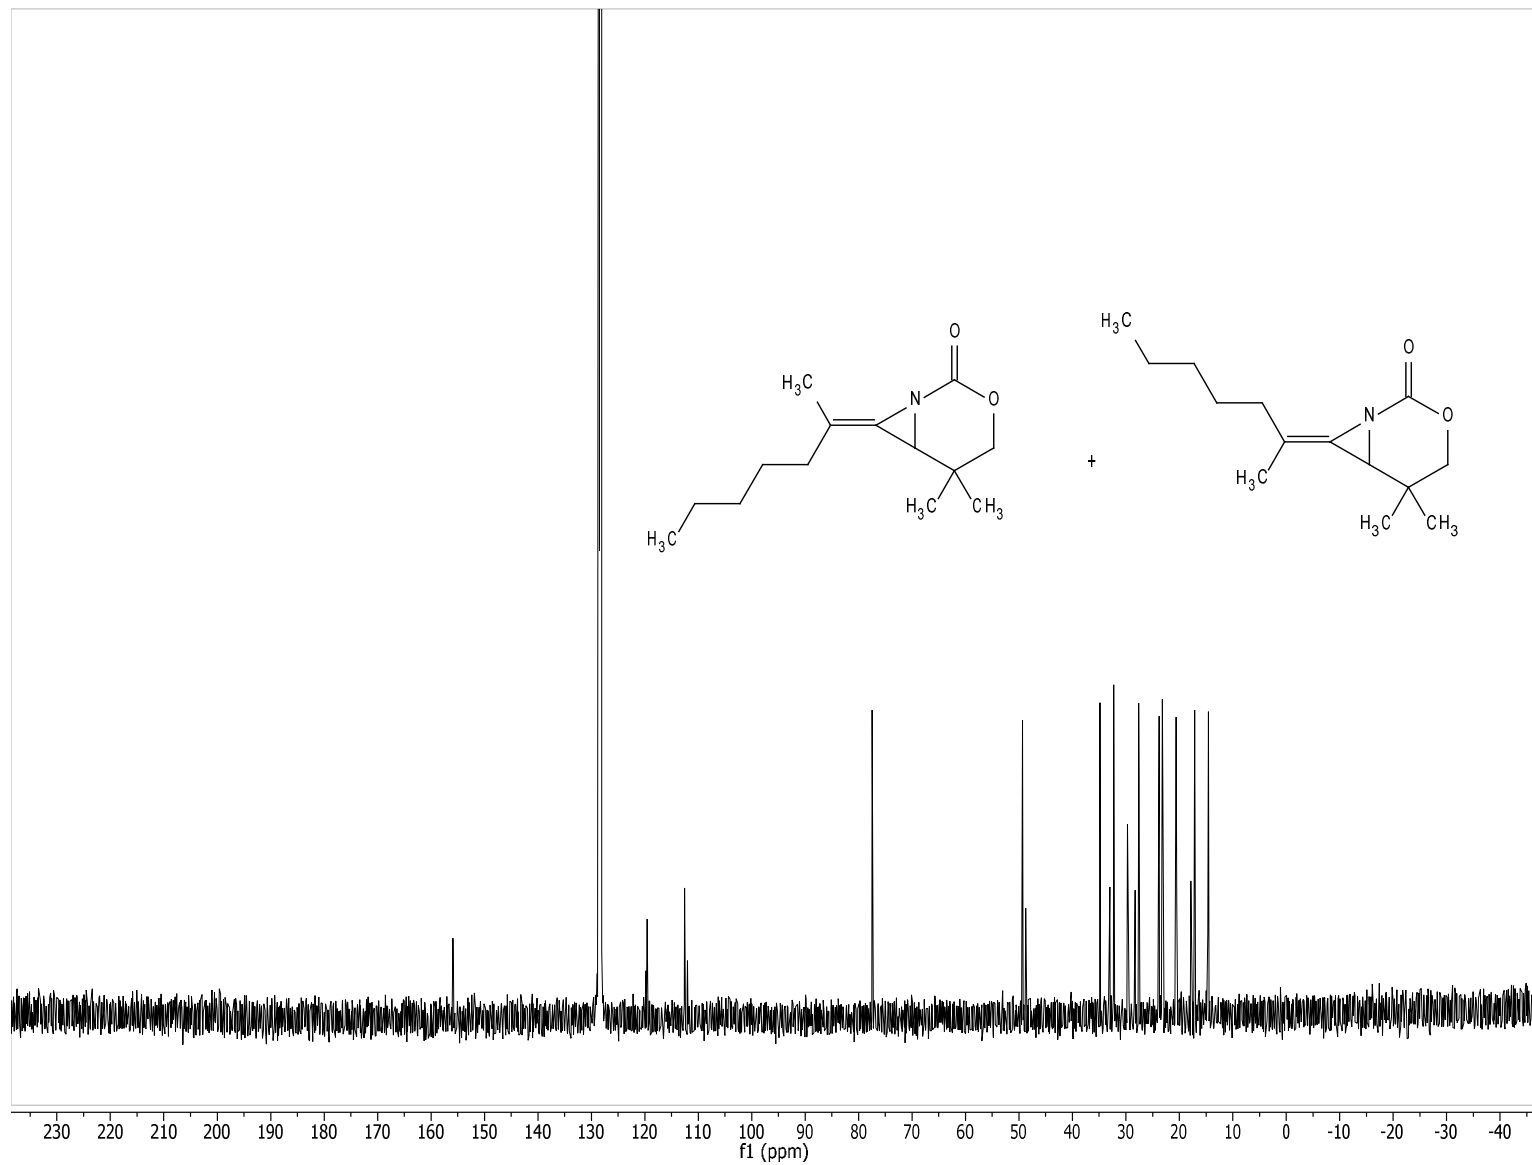

Compound 8c *E* isomer.

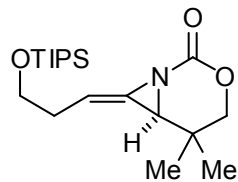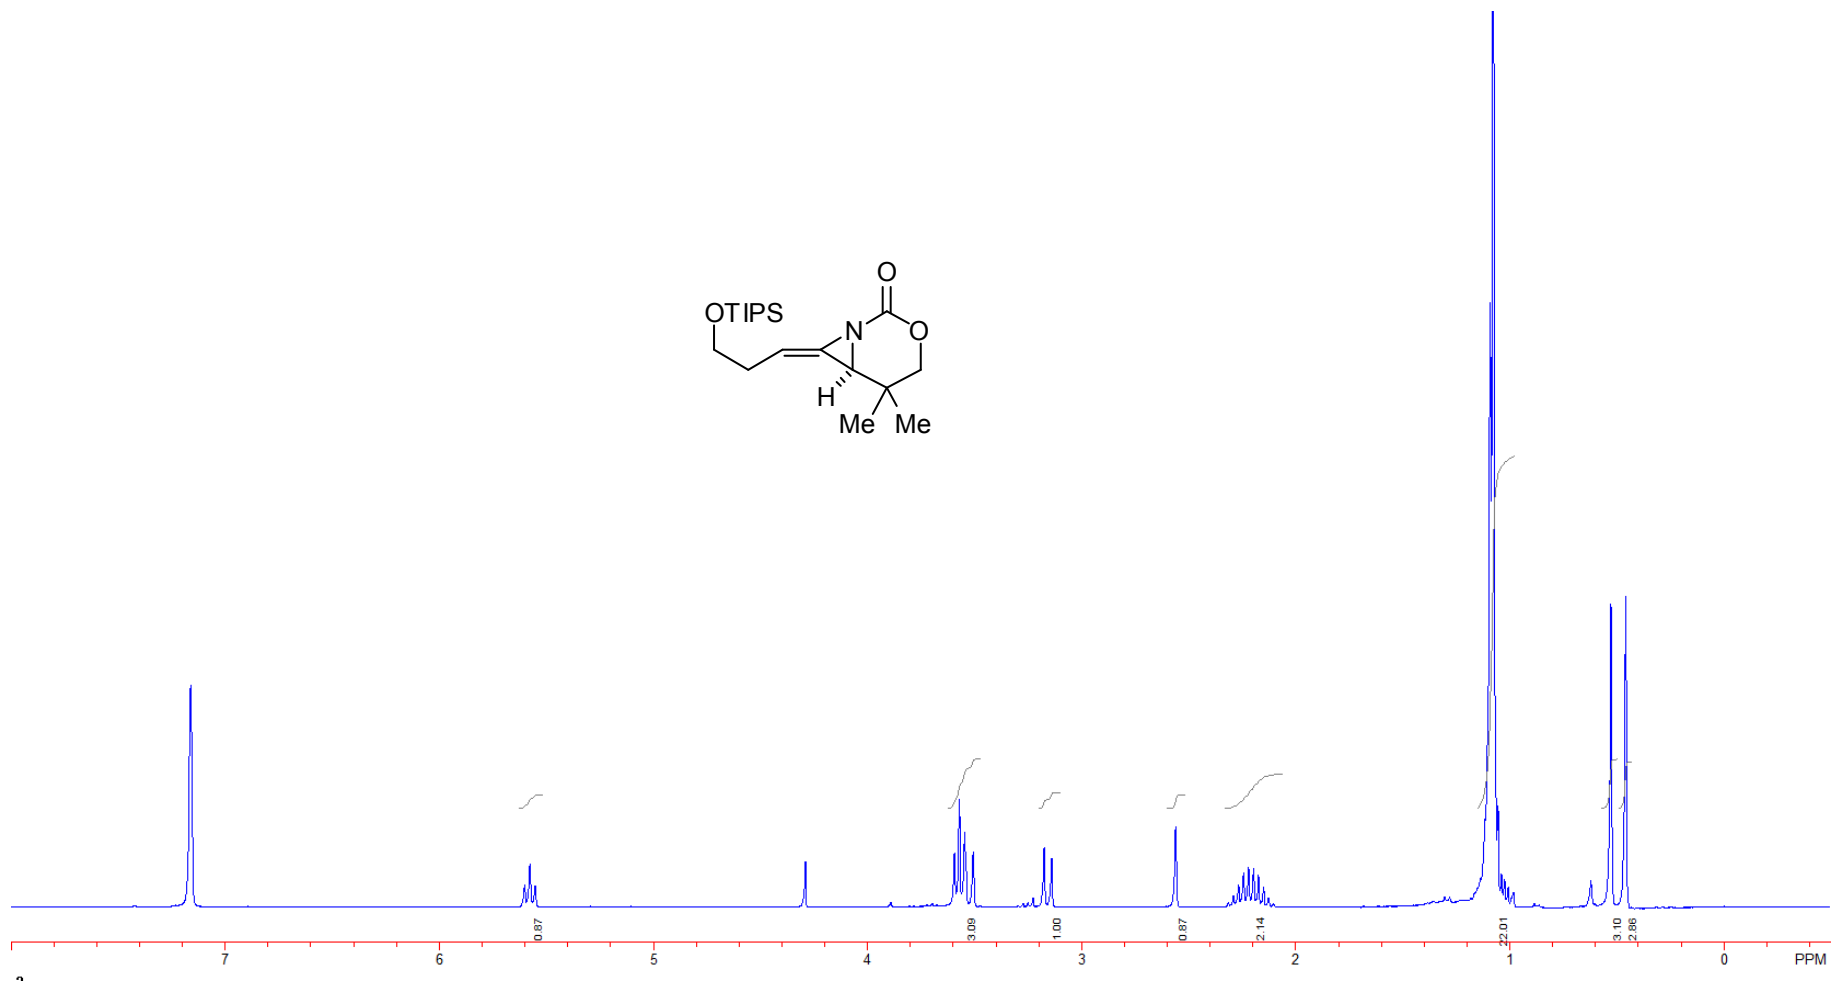

Compound 8c *E* isomer.

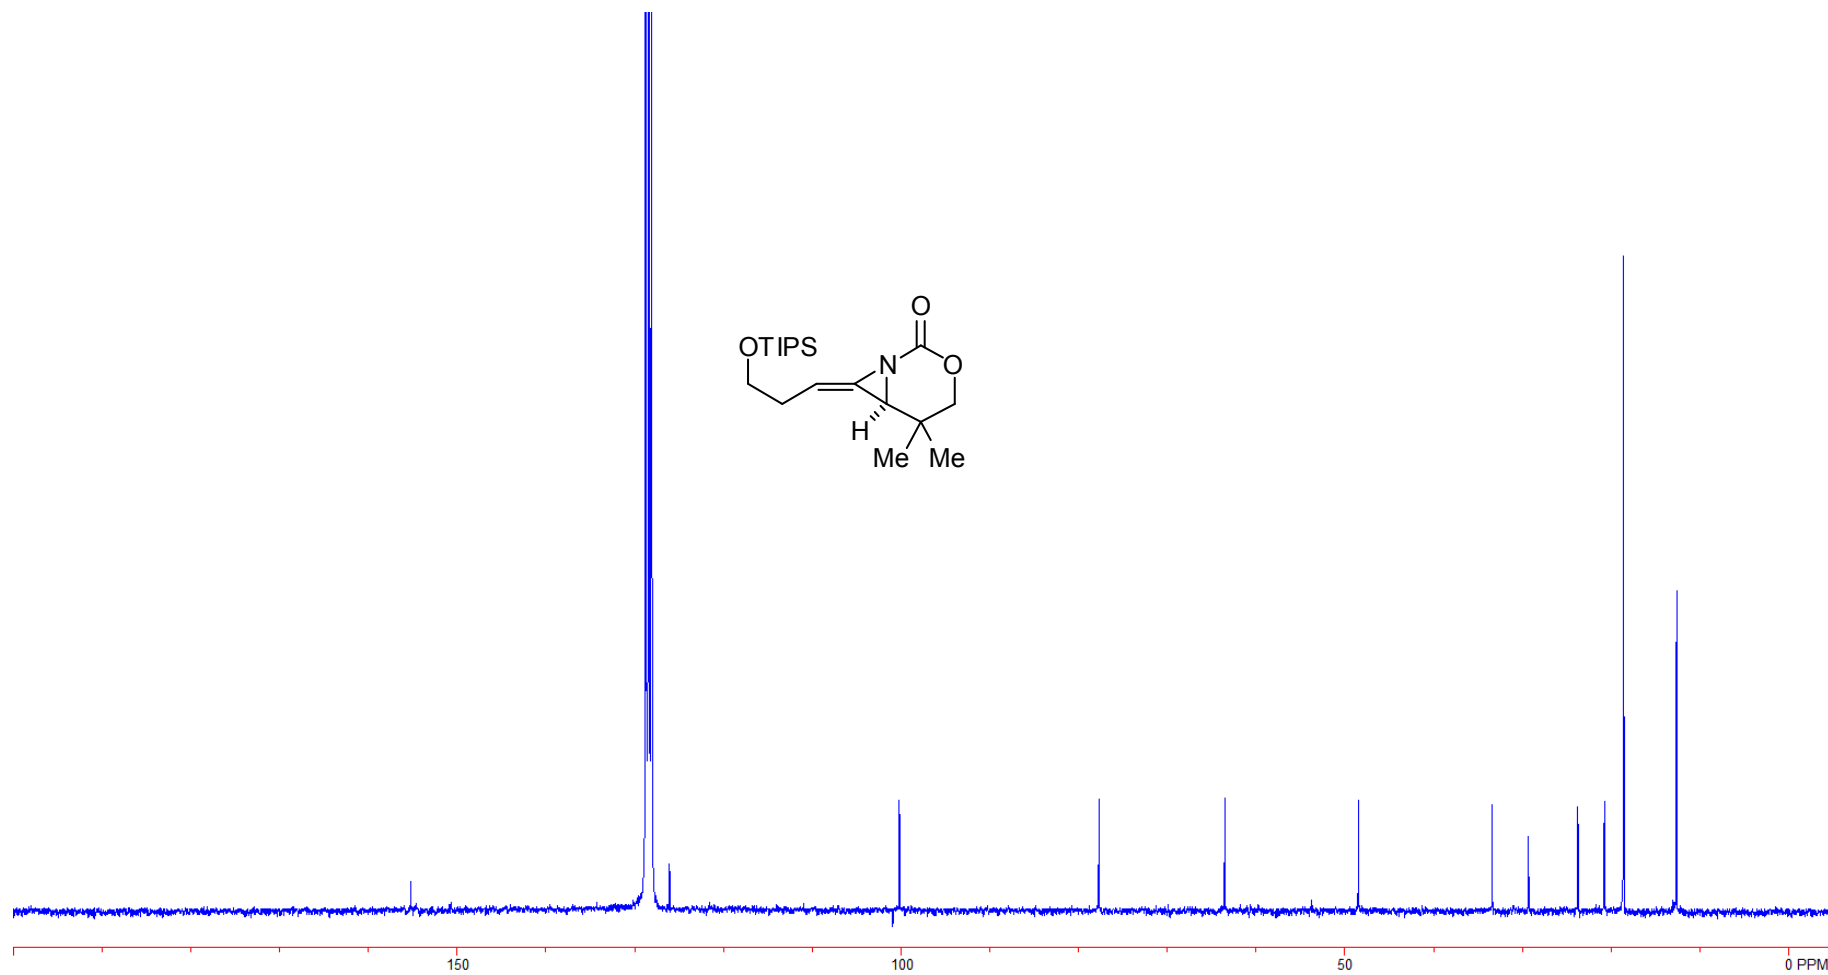

Compound 8c *Z* isomer.

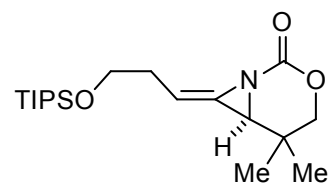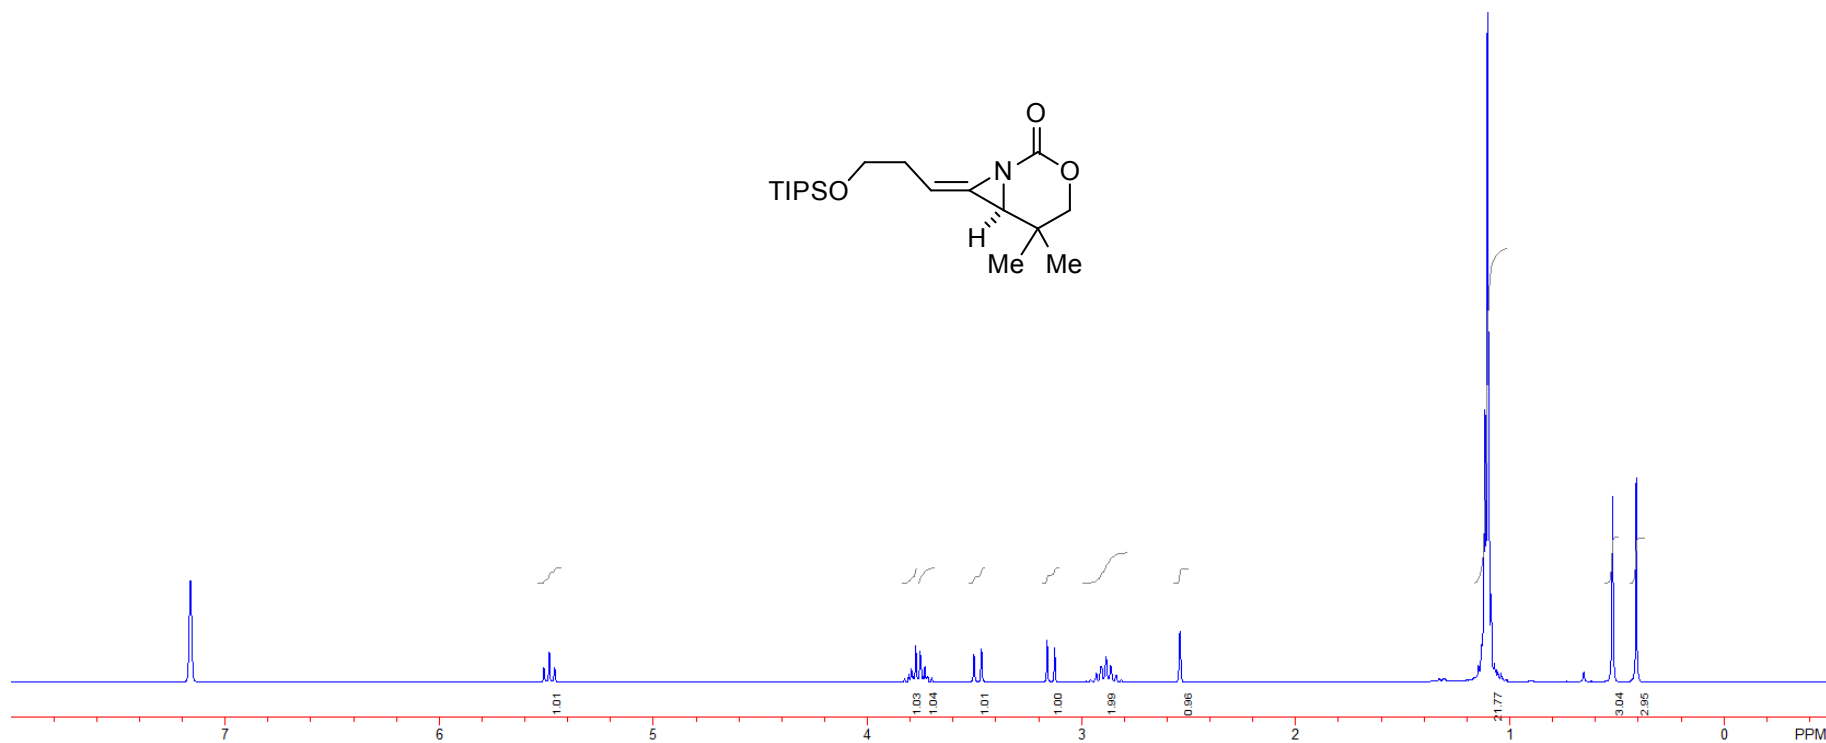

Compound 8c *Z* isomer.

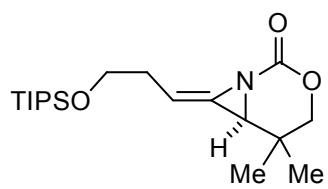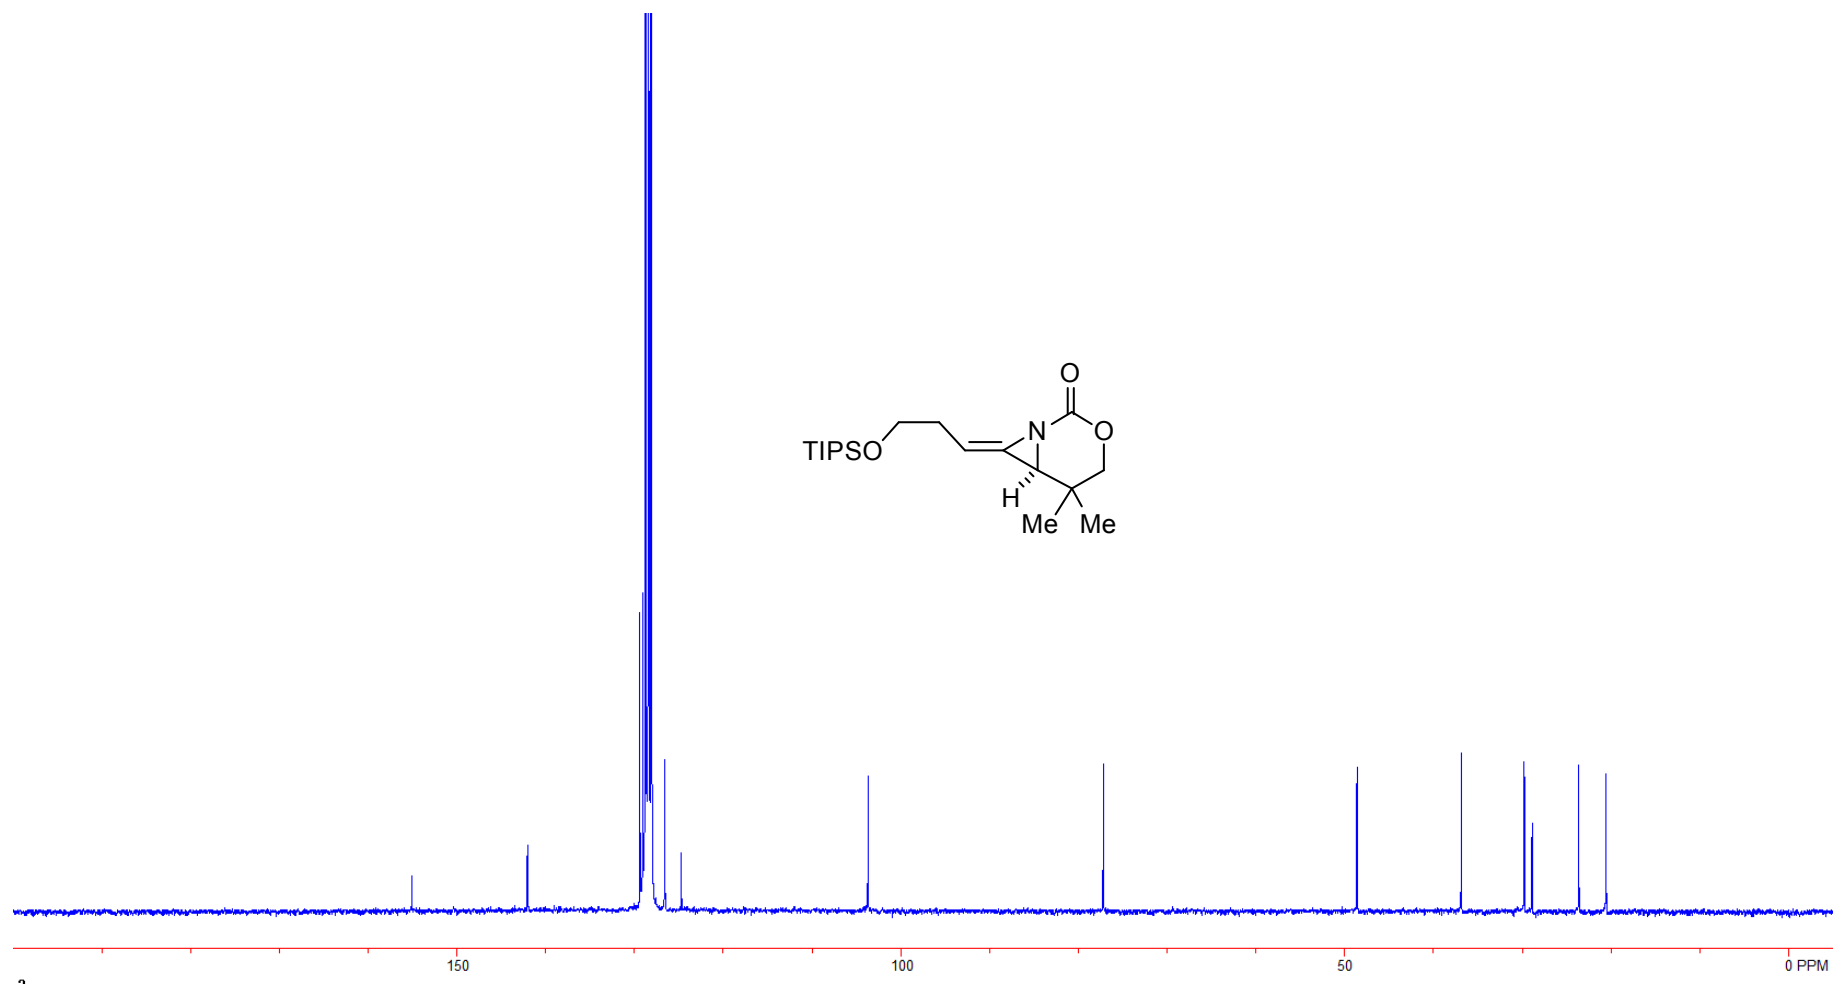

Compound 8d *E* isomer.

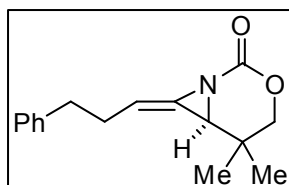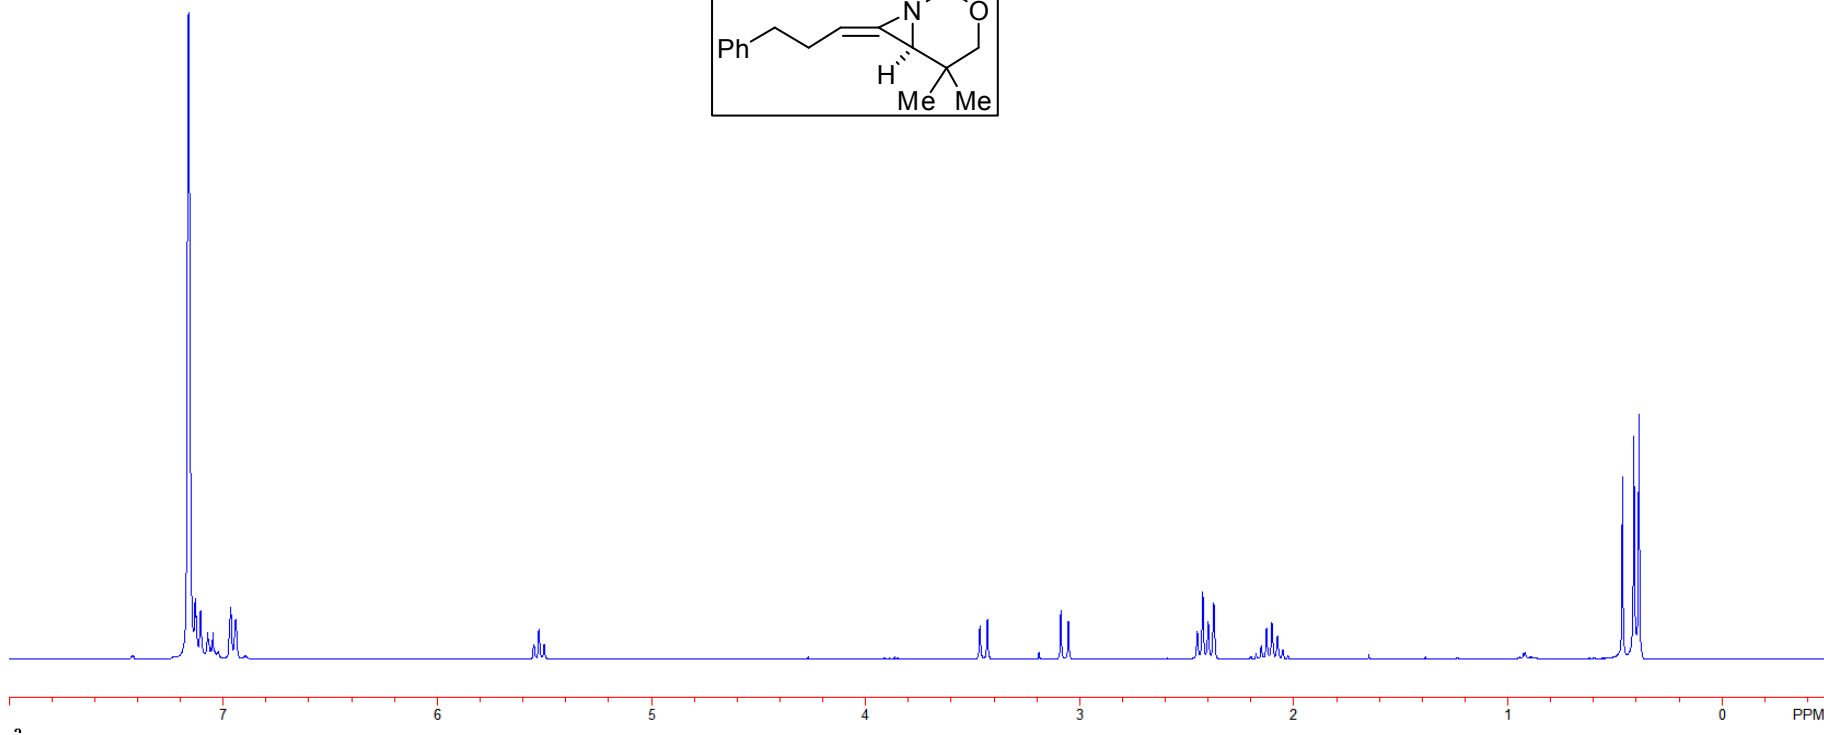

Compound 8d *E* isomer.

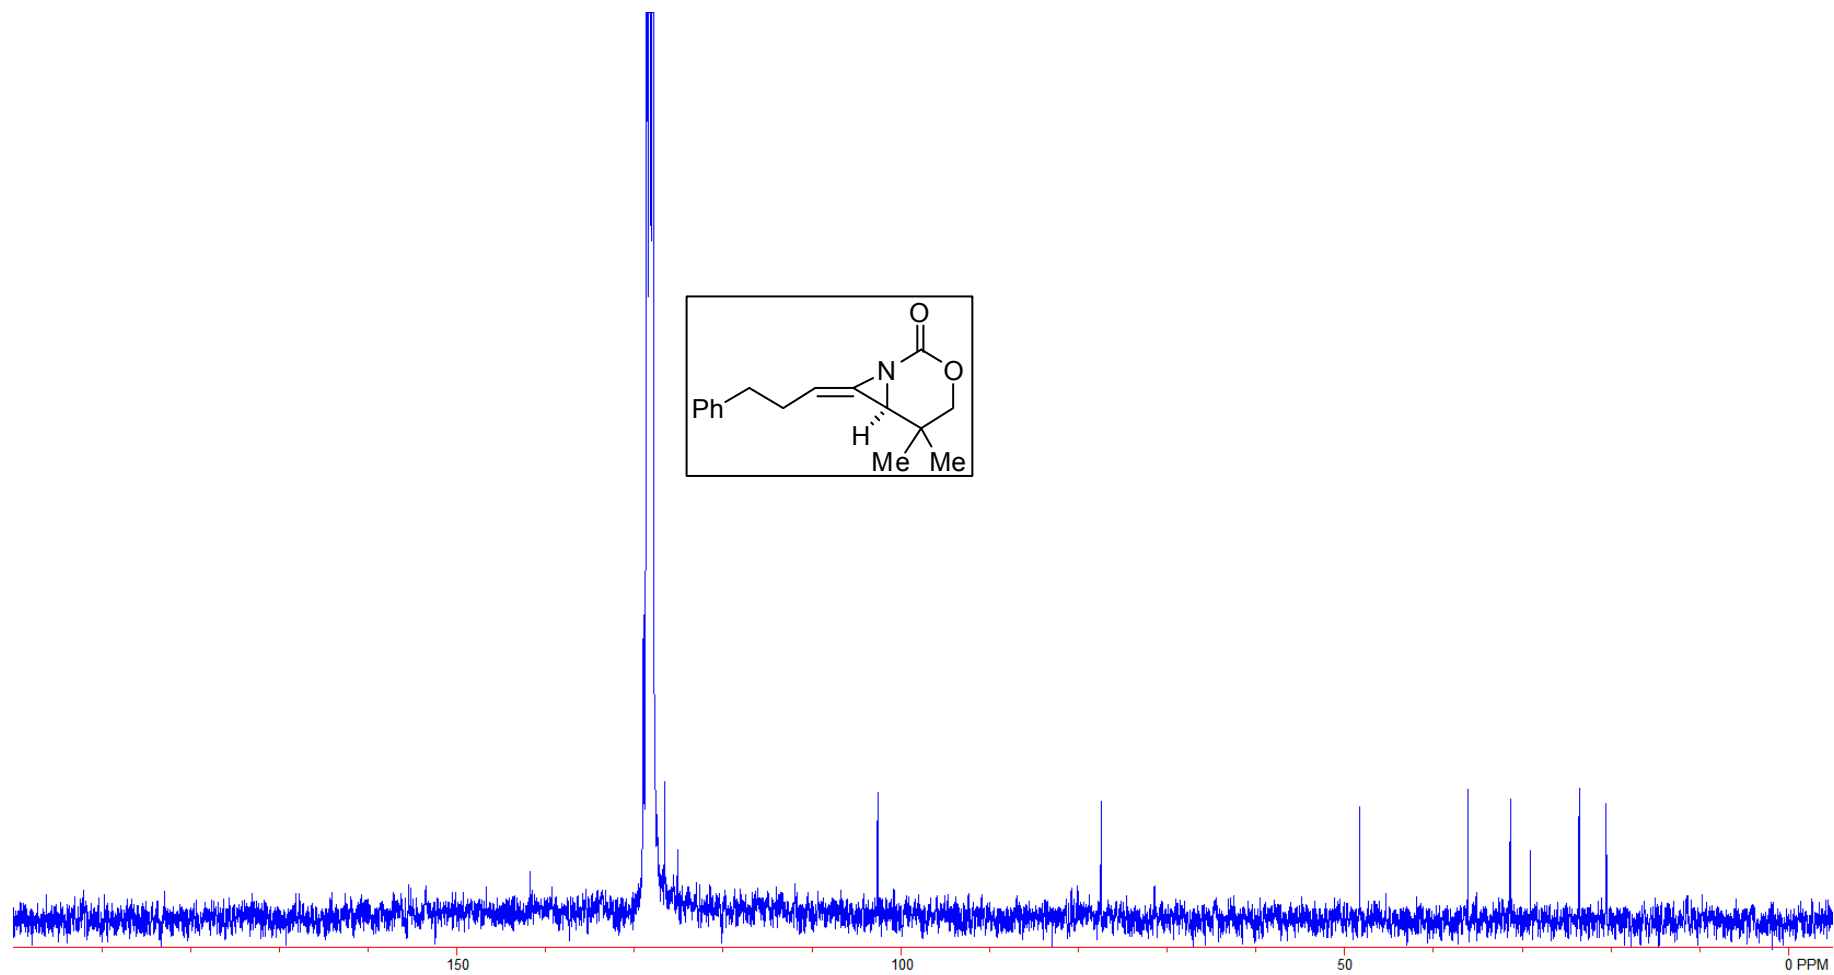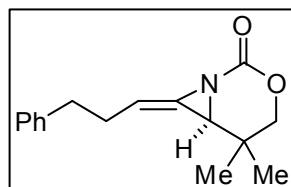

Compound 8d *Z* isomer.

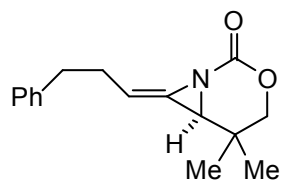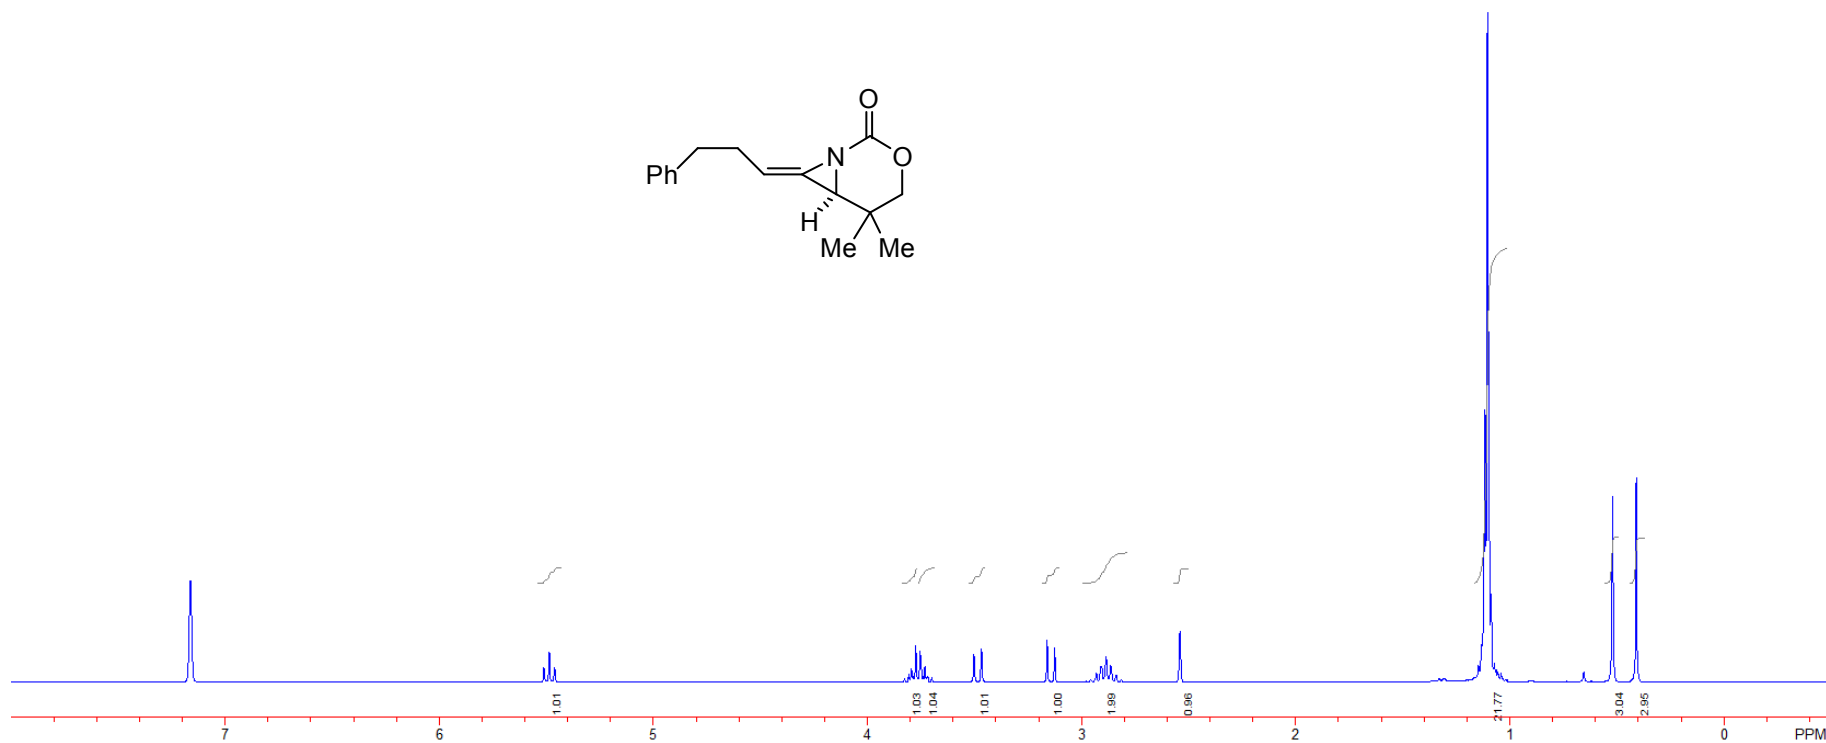



Compound 8d *Z* isomer.

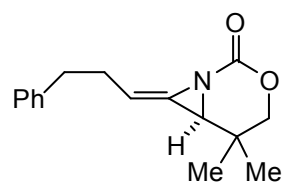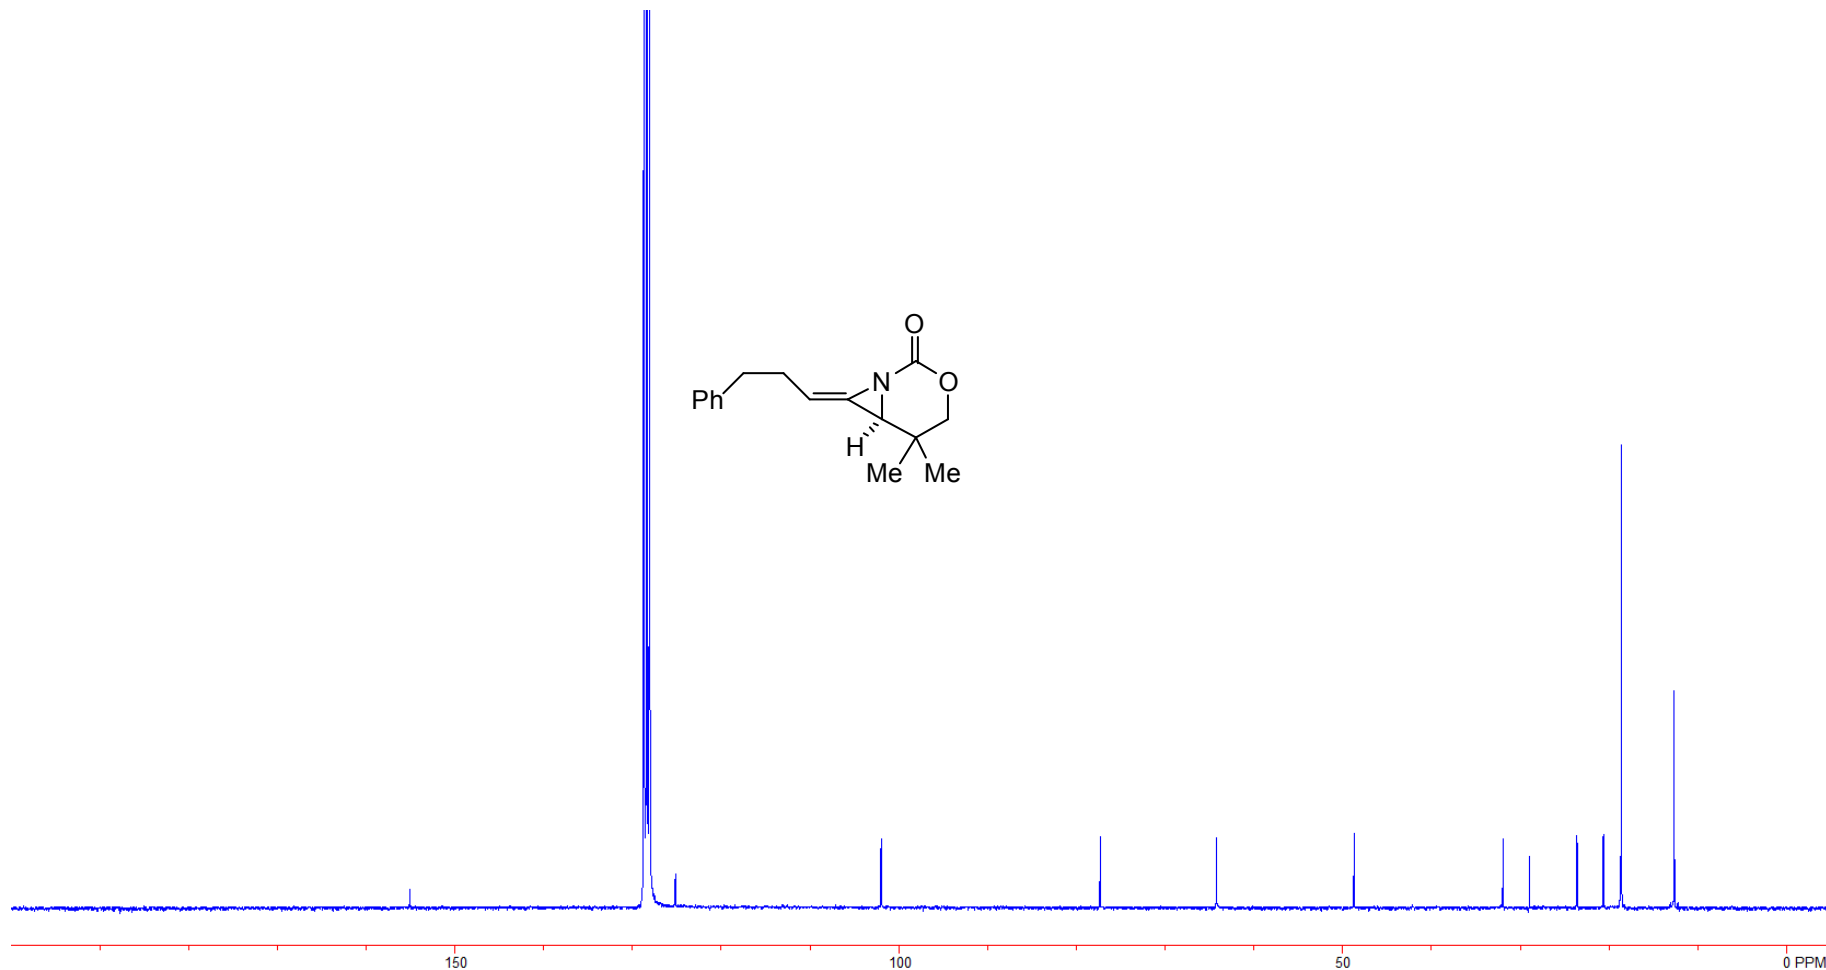

S1-33

Compound 8e.

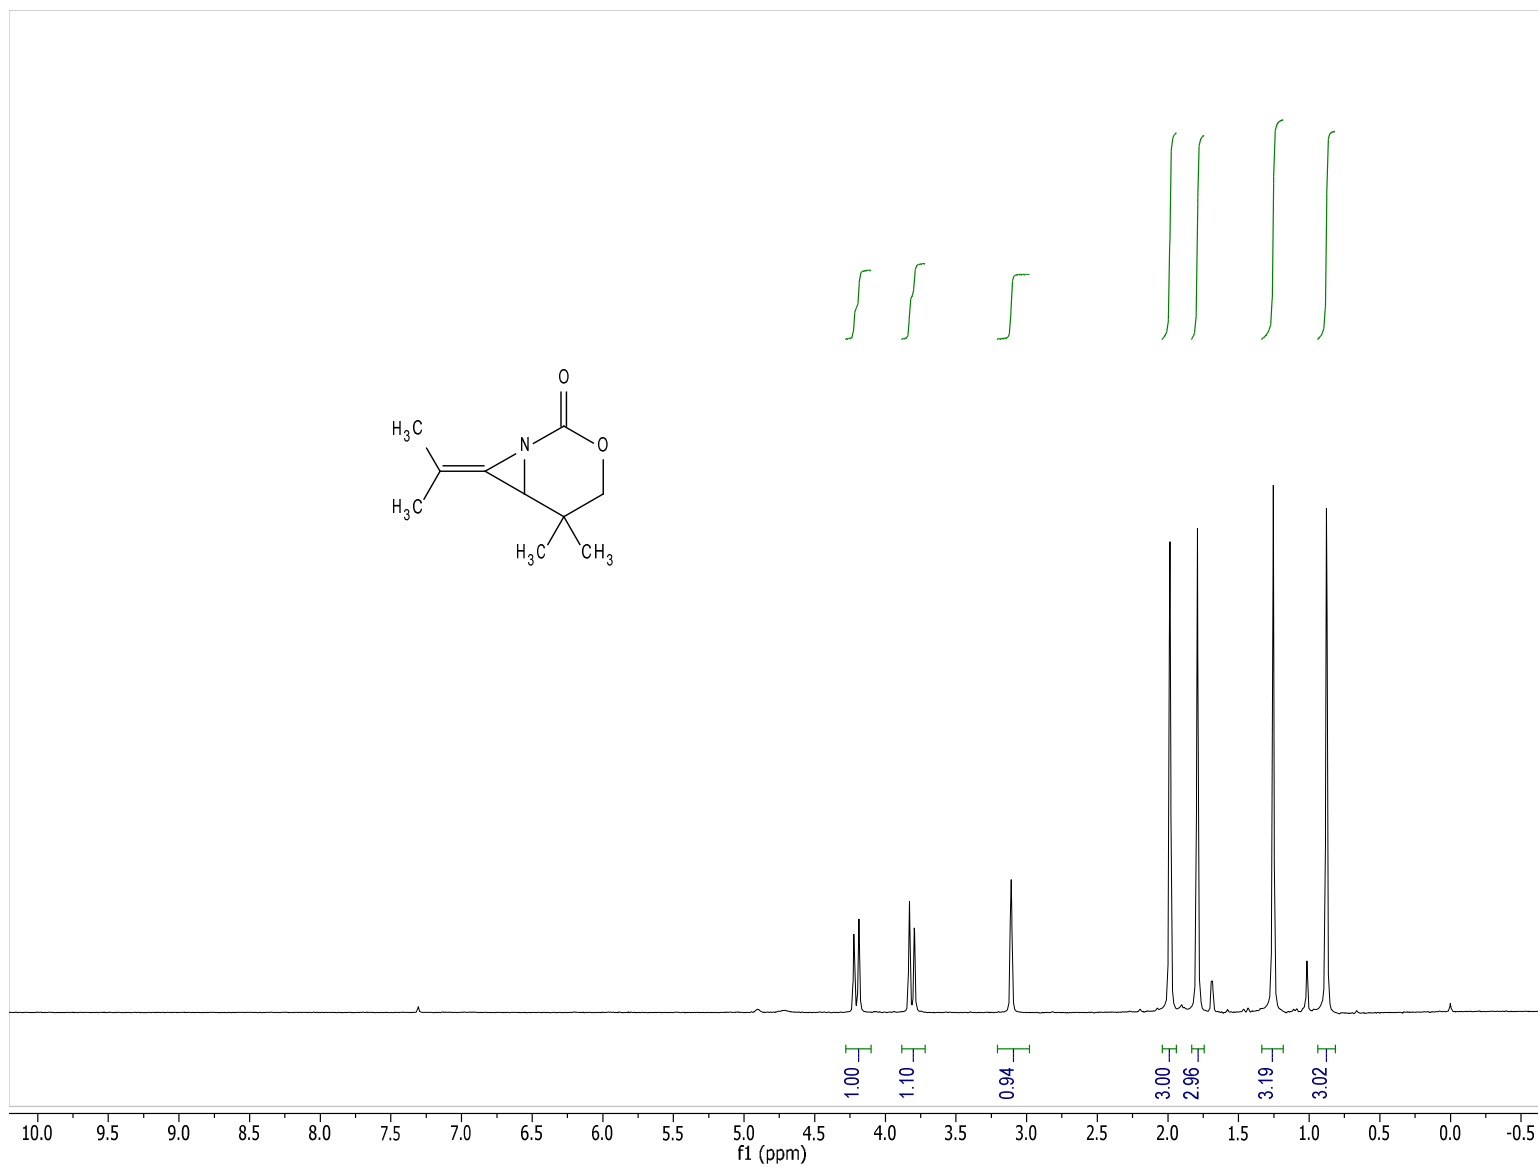

**Compound 8e.**

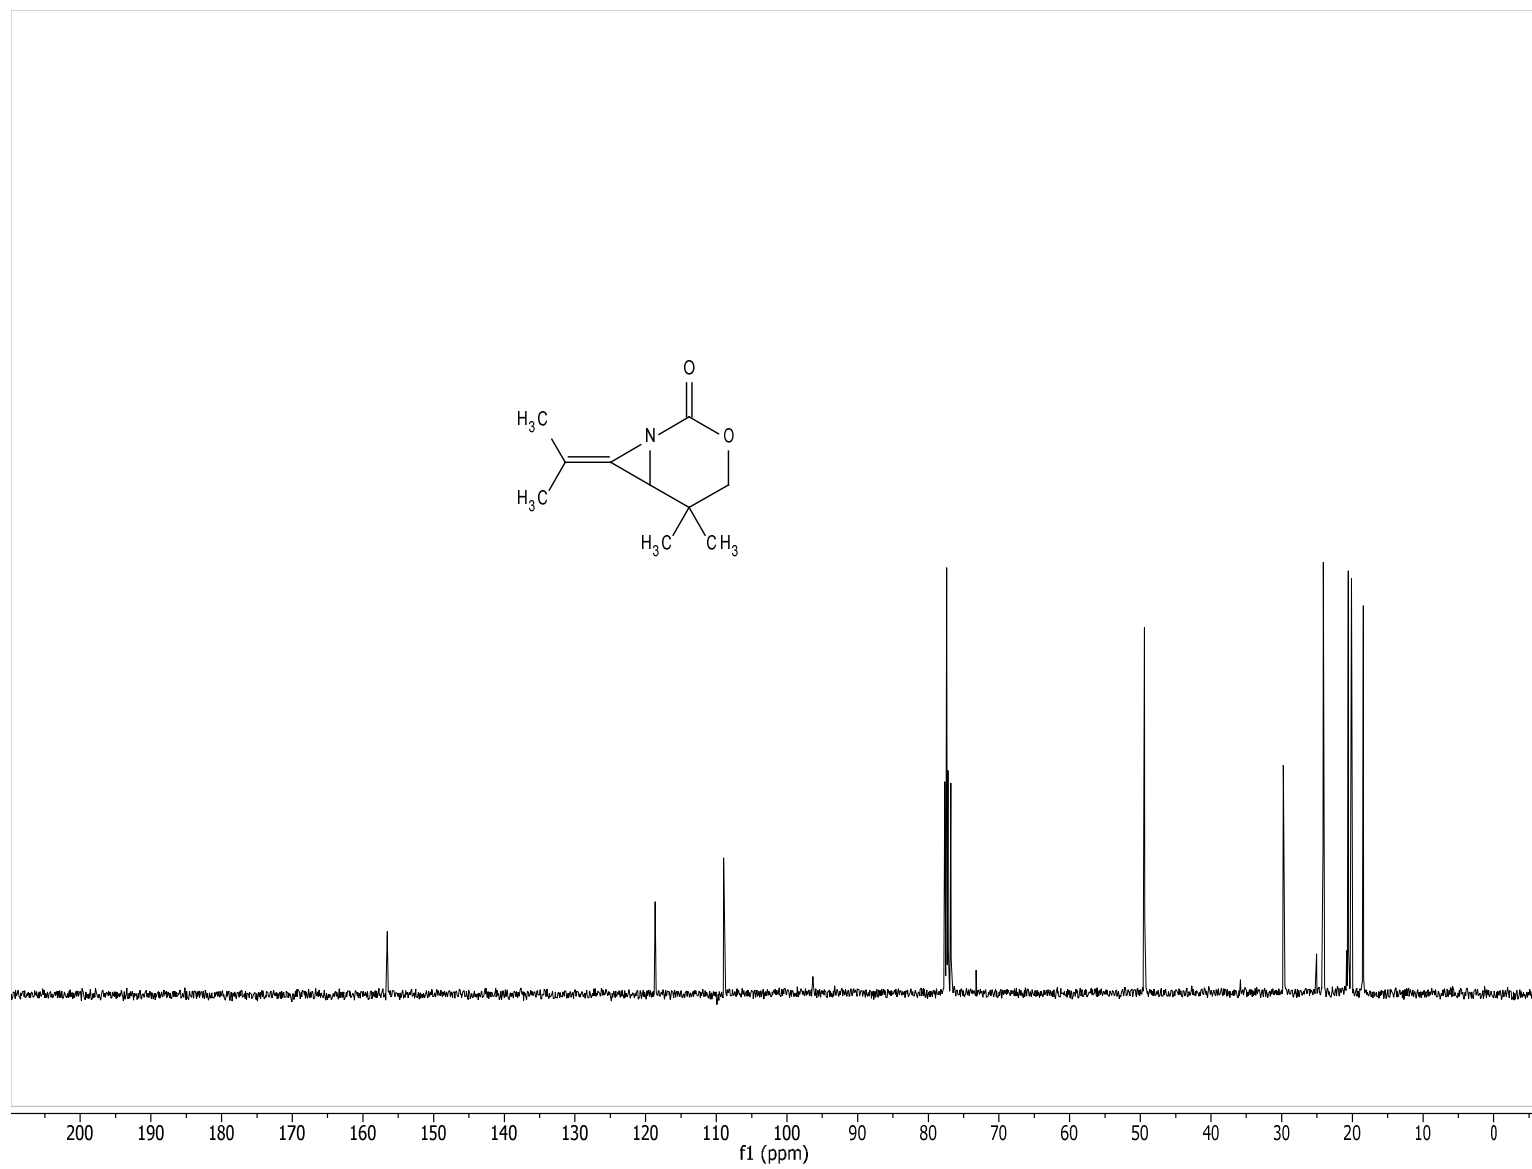

Compound 8f.

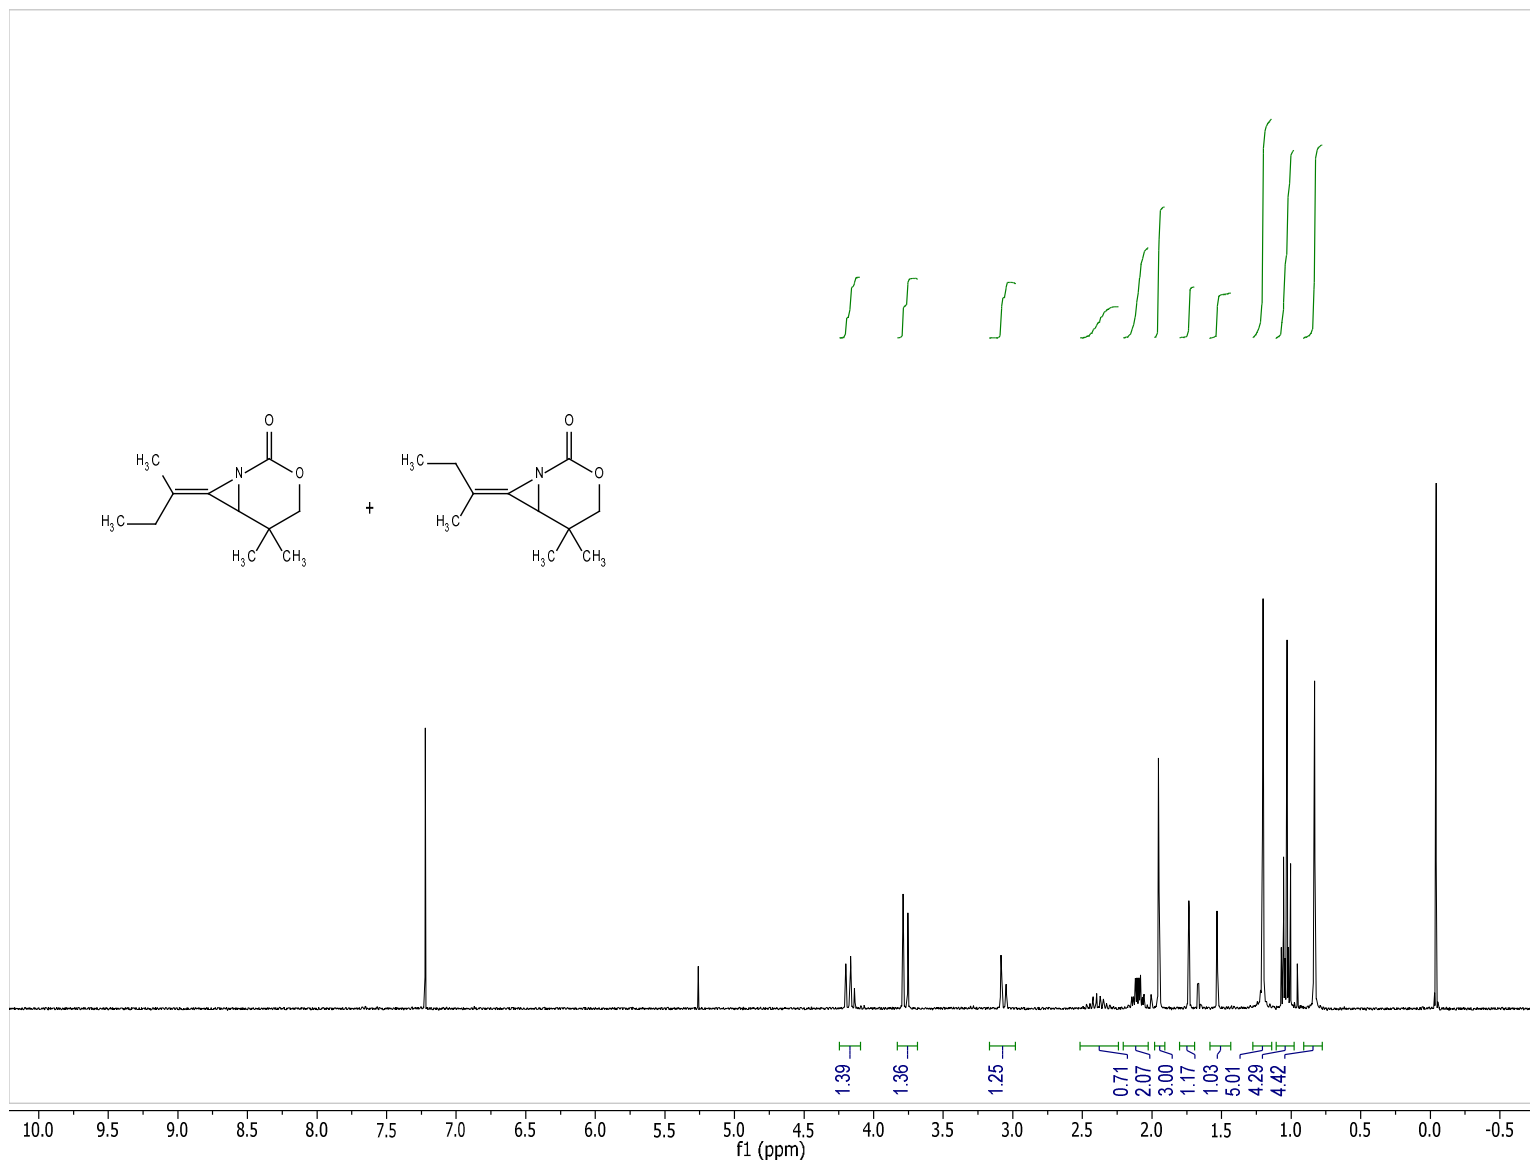

# Compound 8f.

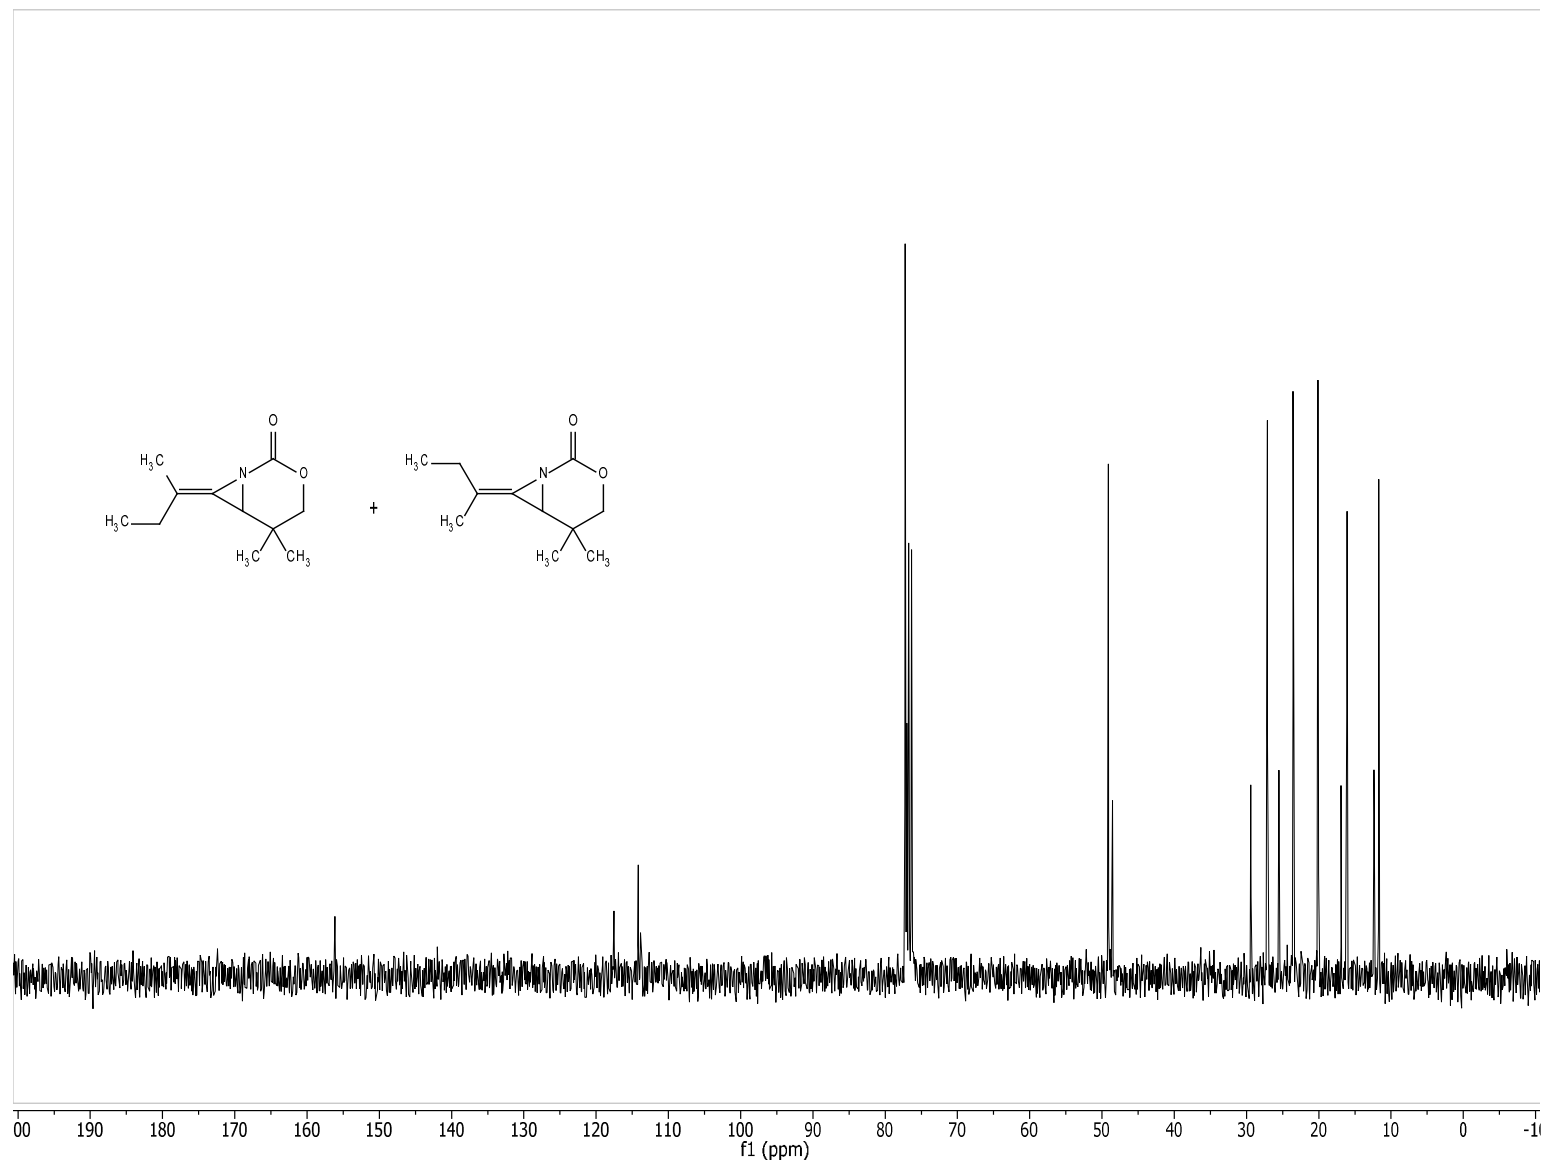

# Compound 8g.

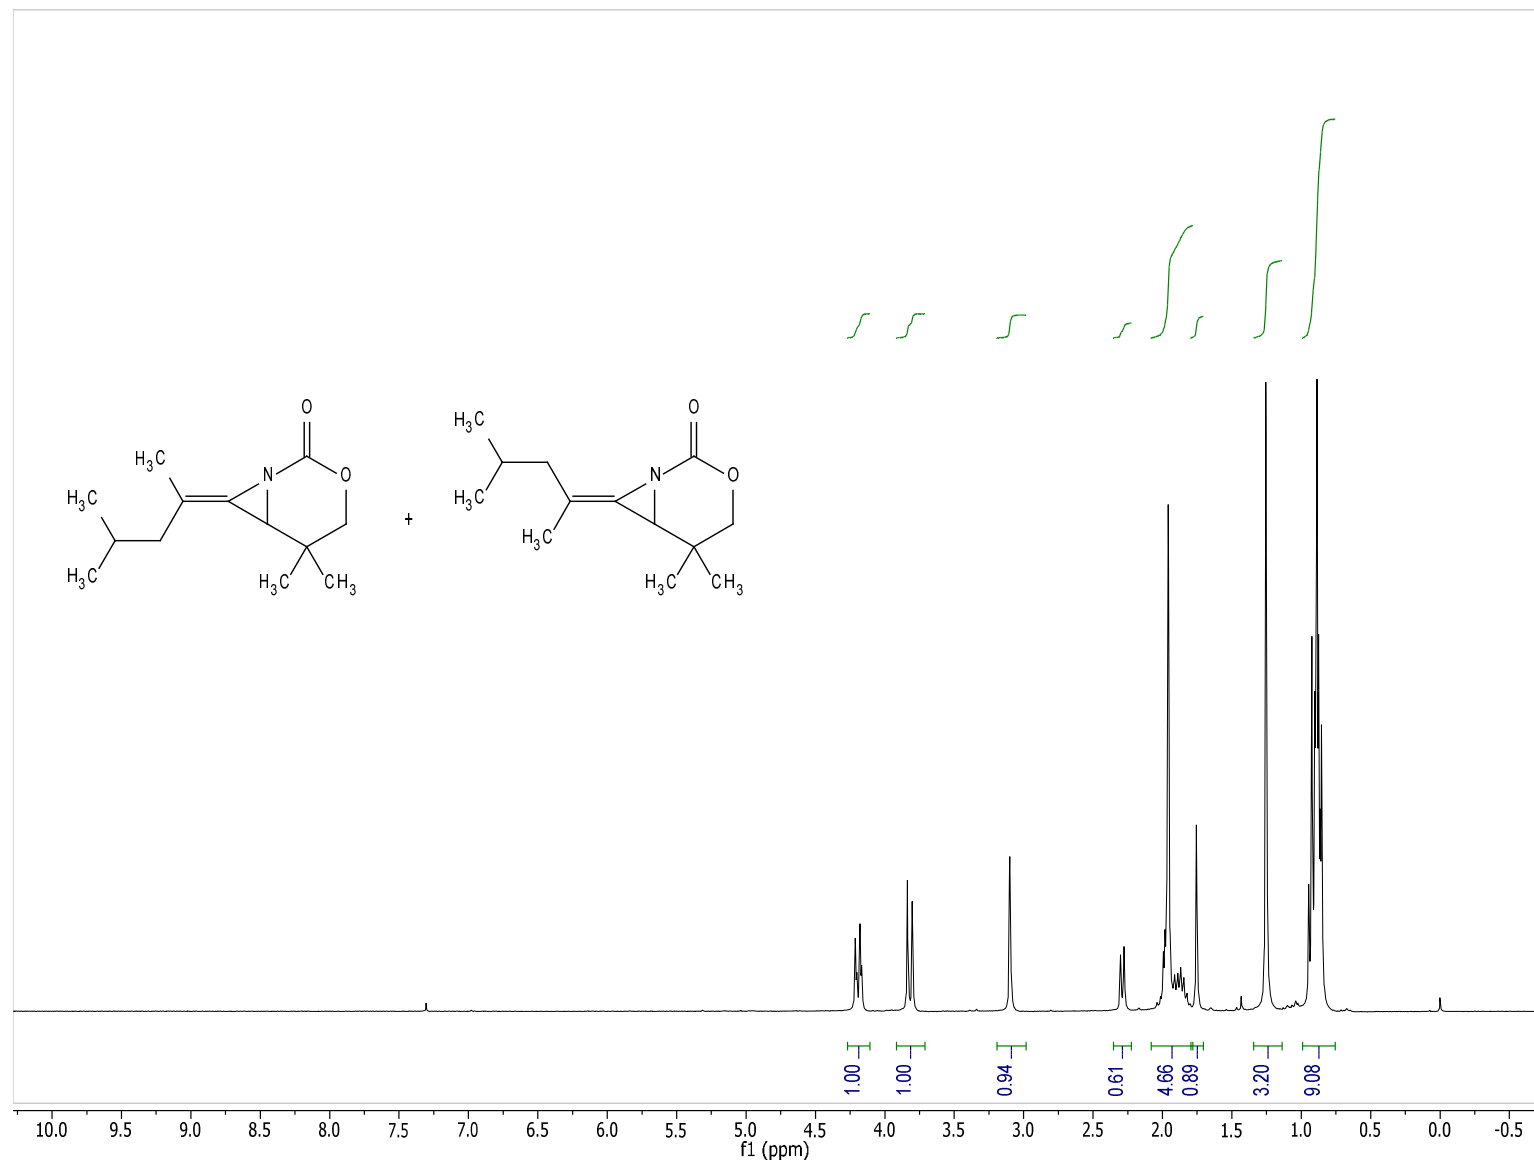

**Compound 8g.**

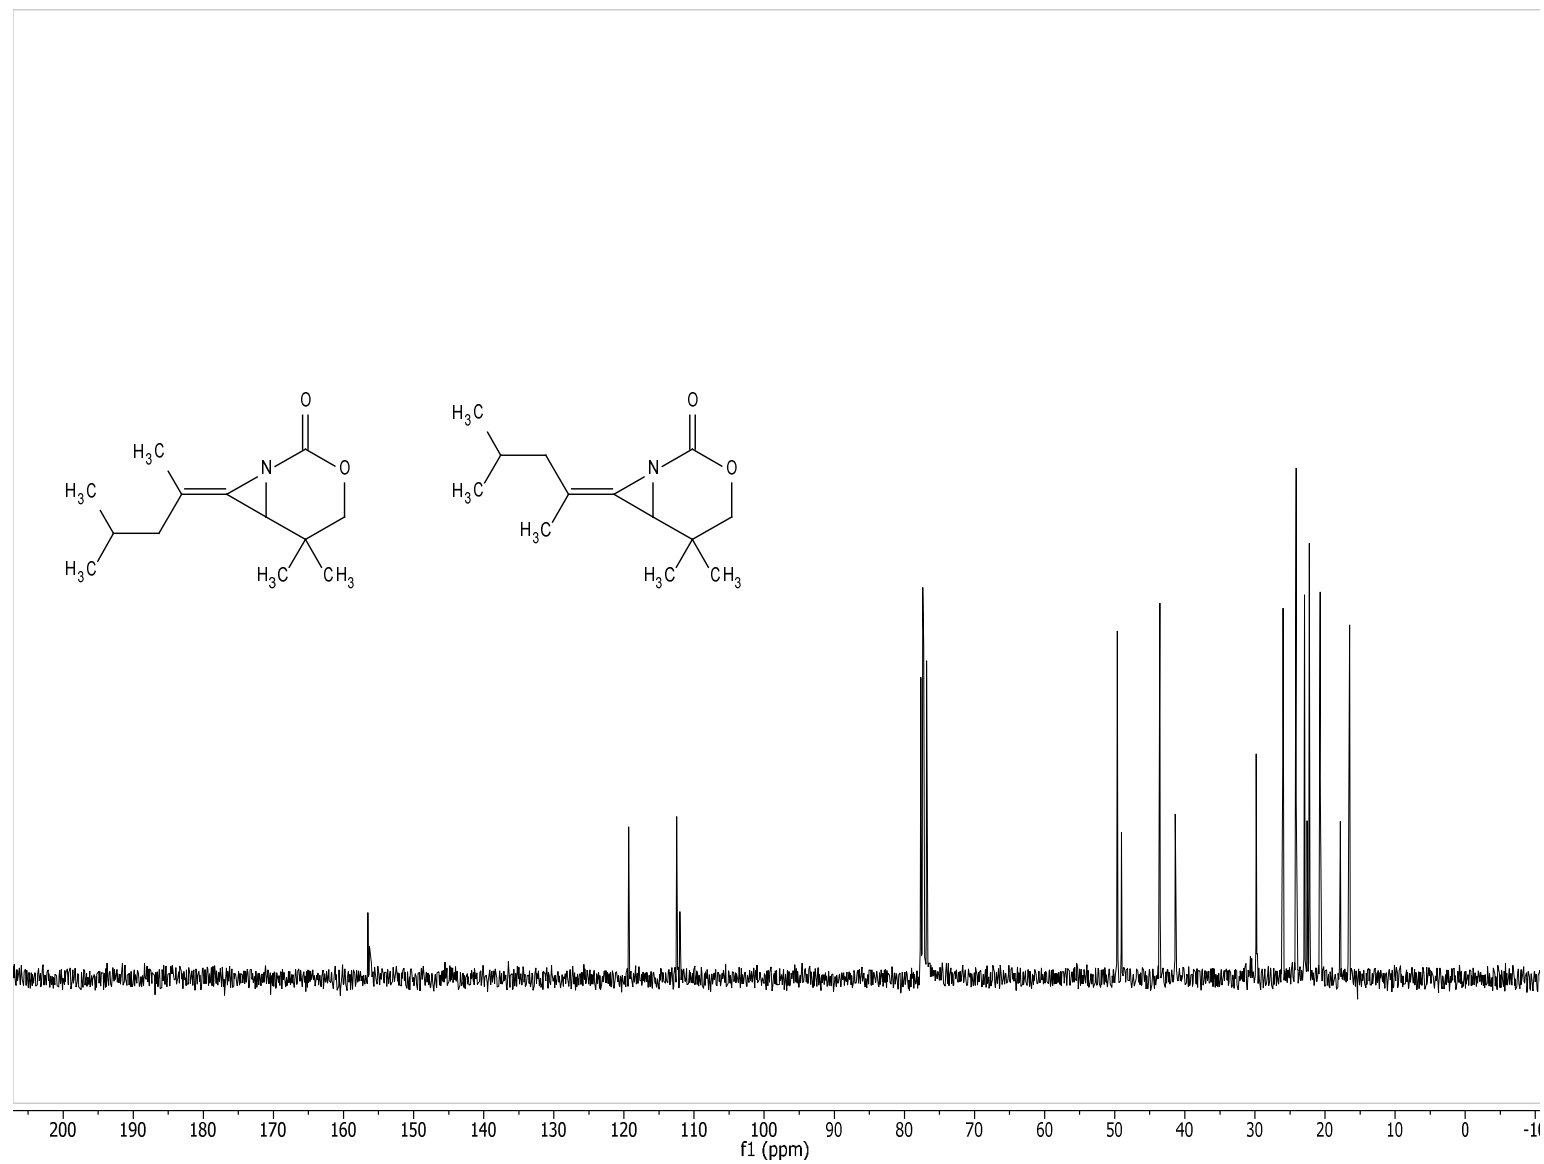

**Compound 8h.**

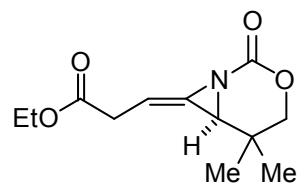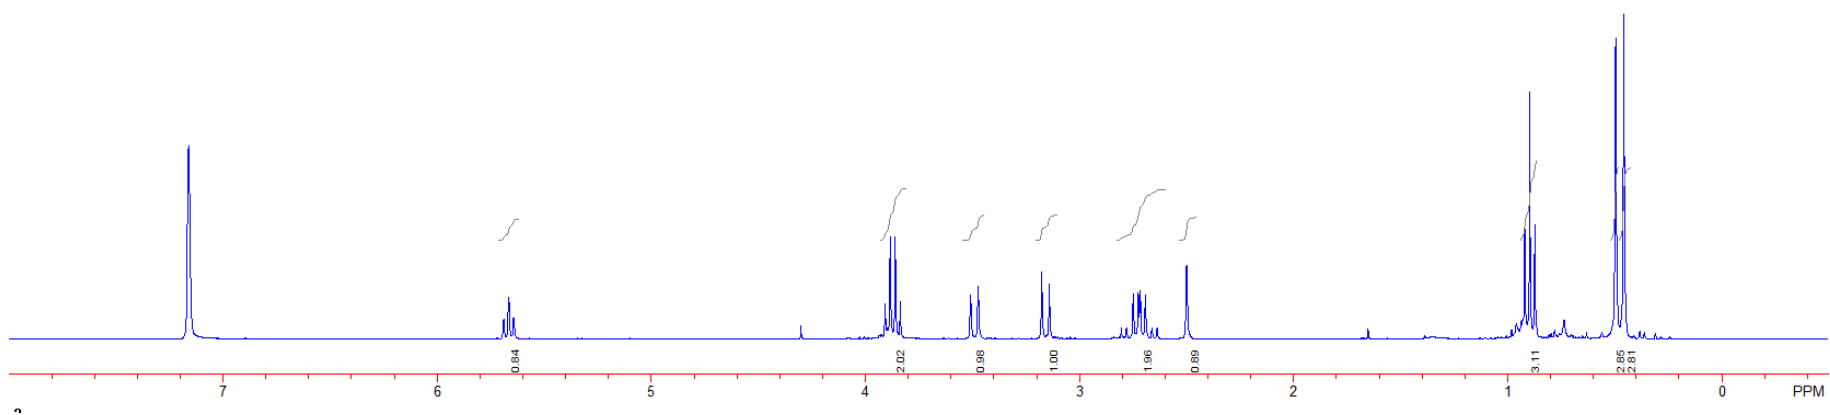



Compound 8h.

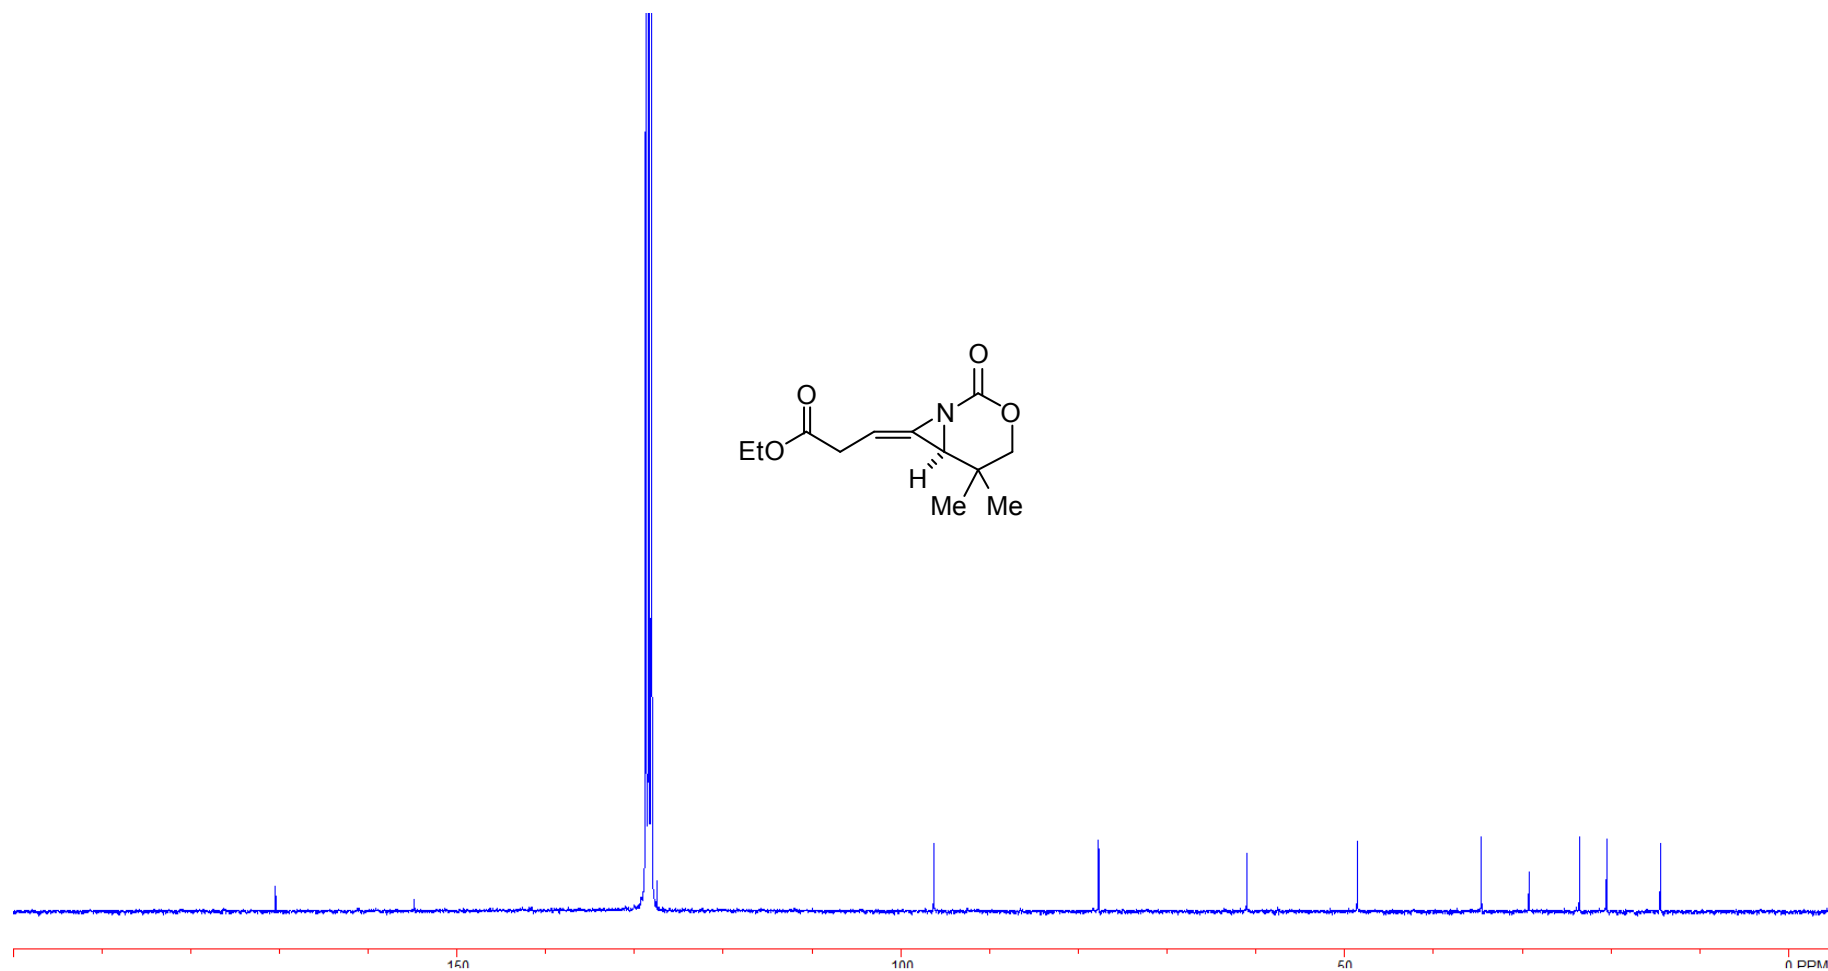

# Compound 8i.

JWR3240.001

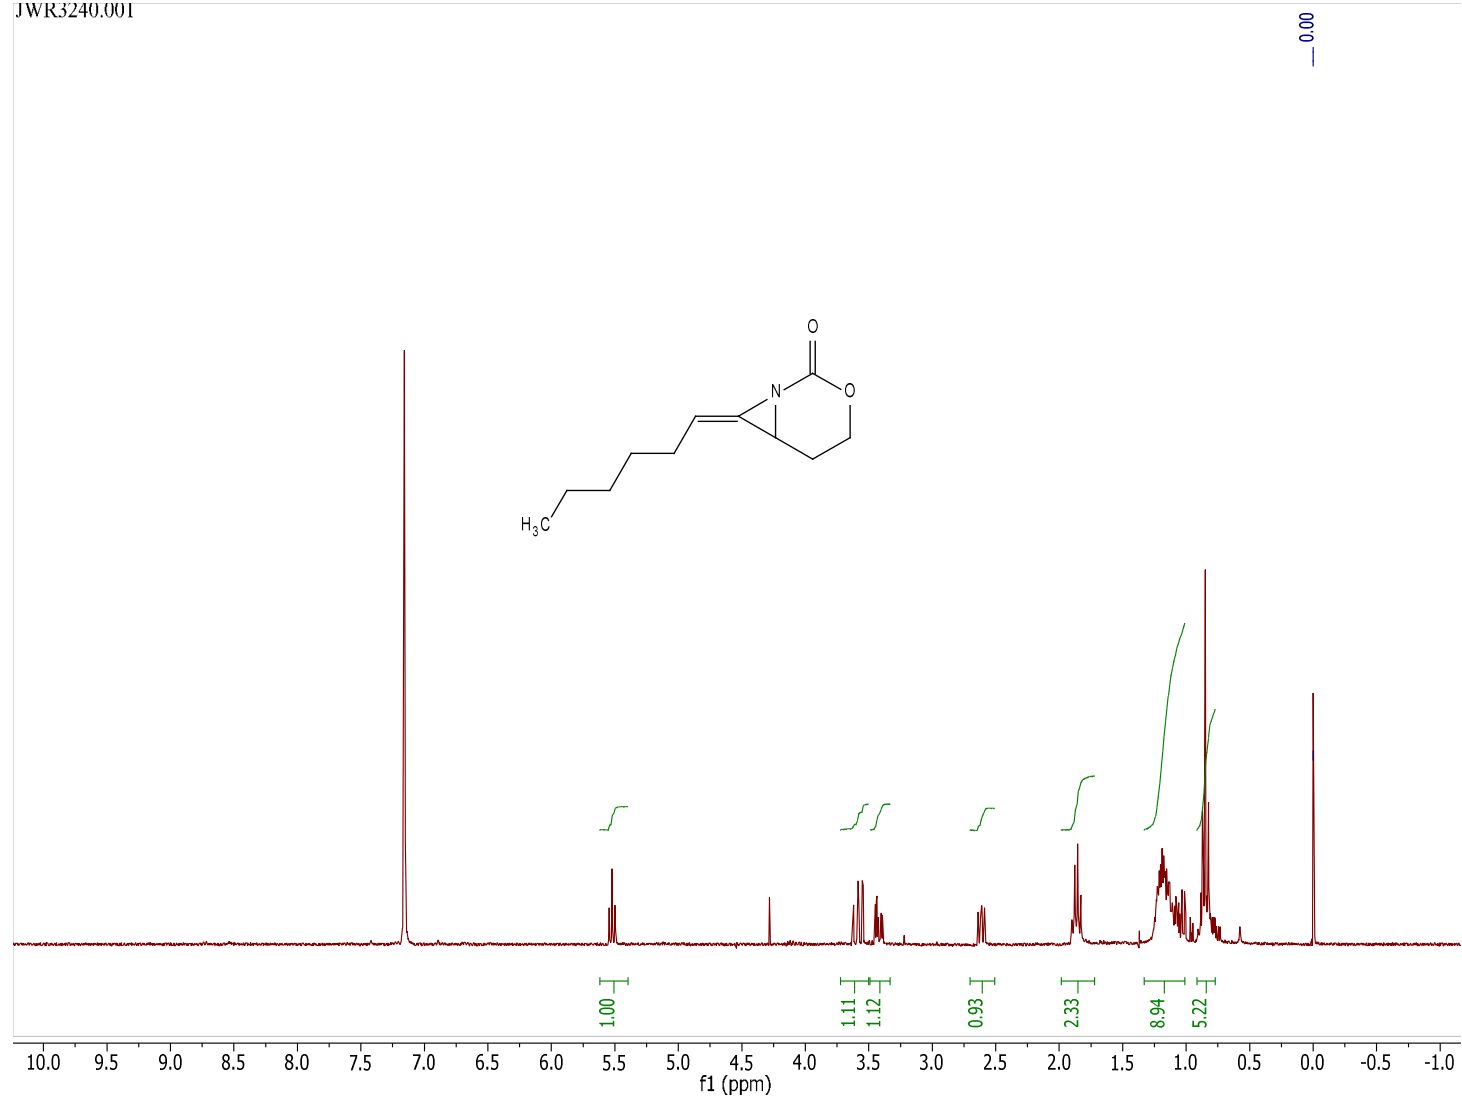

Compound 8j.

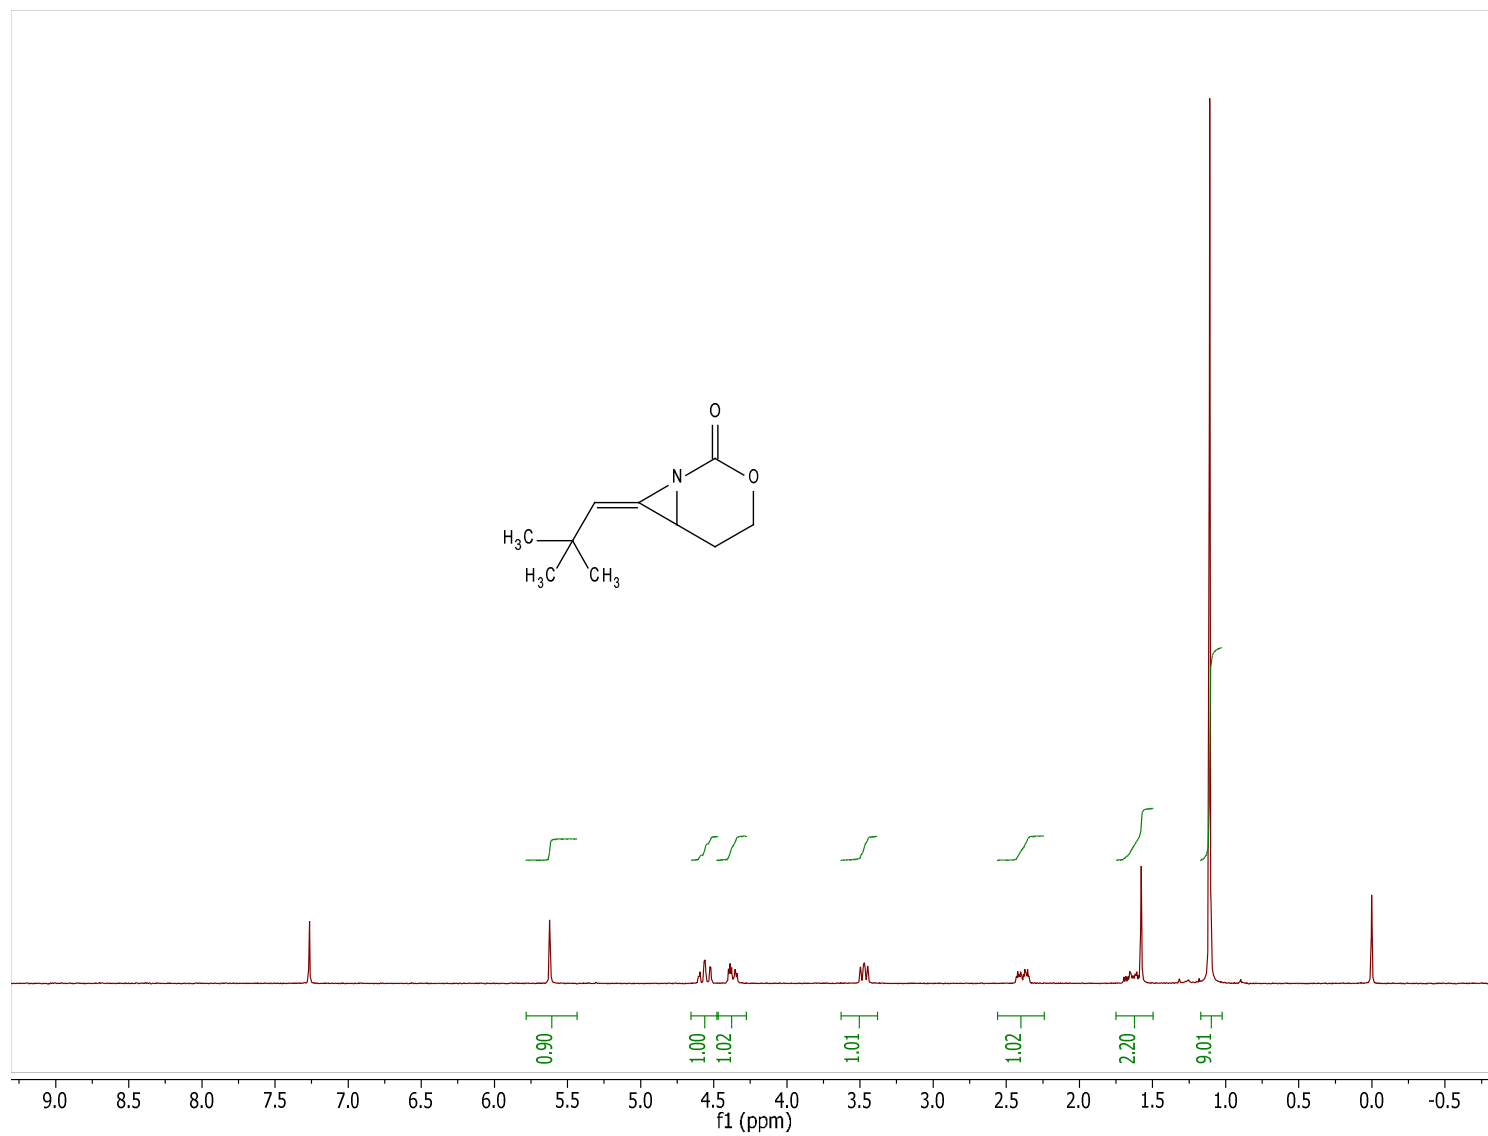

Compound 8k.

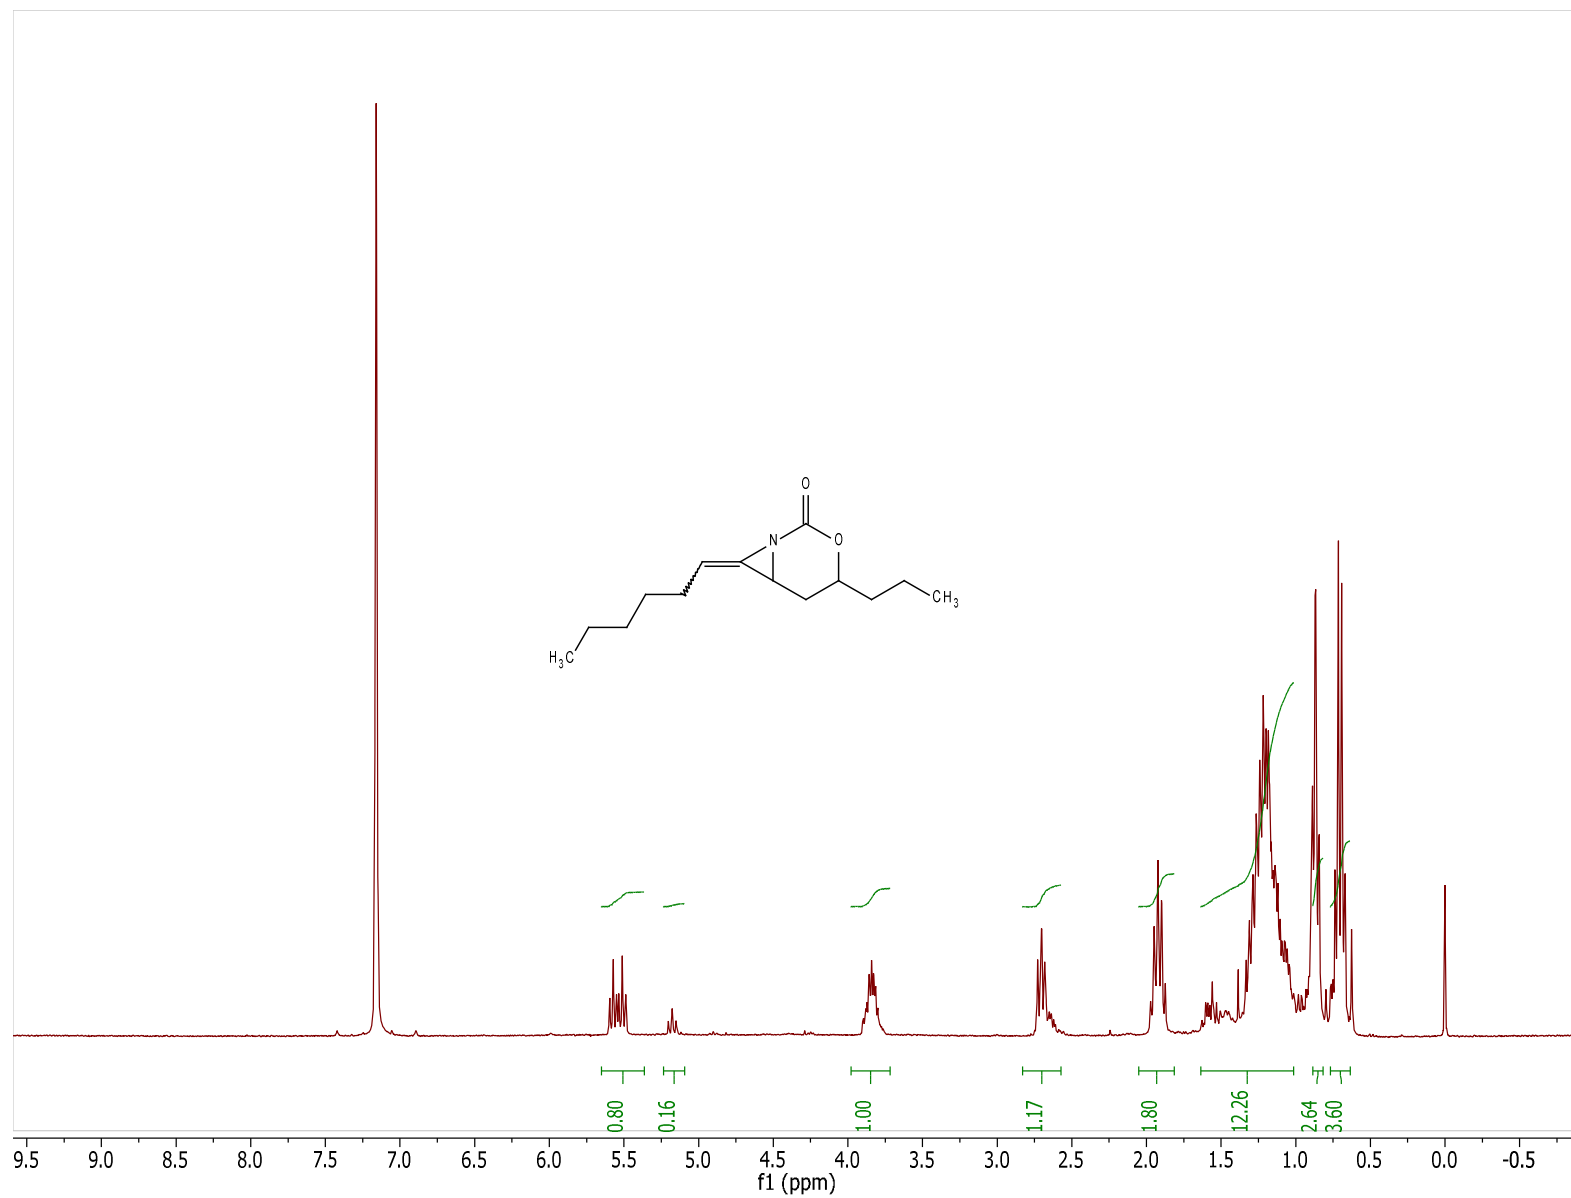

**Compound 8l.**

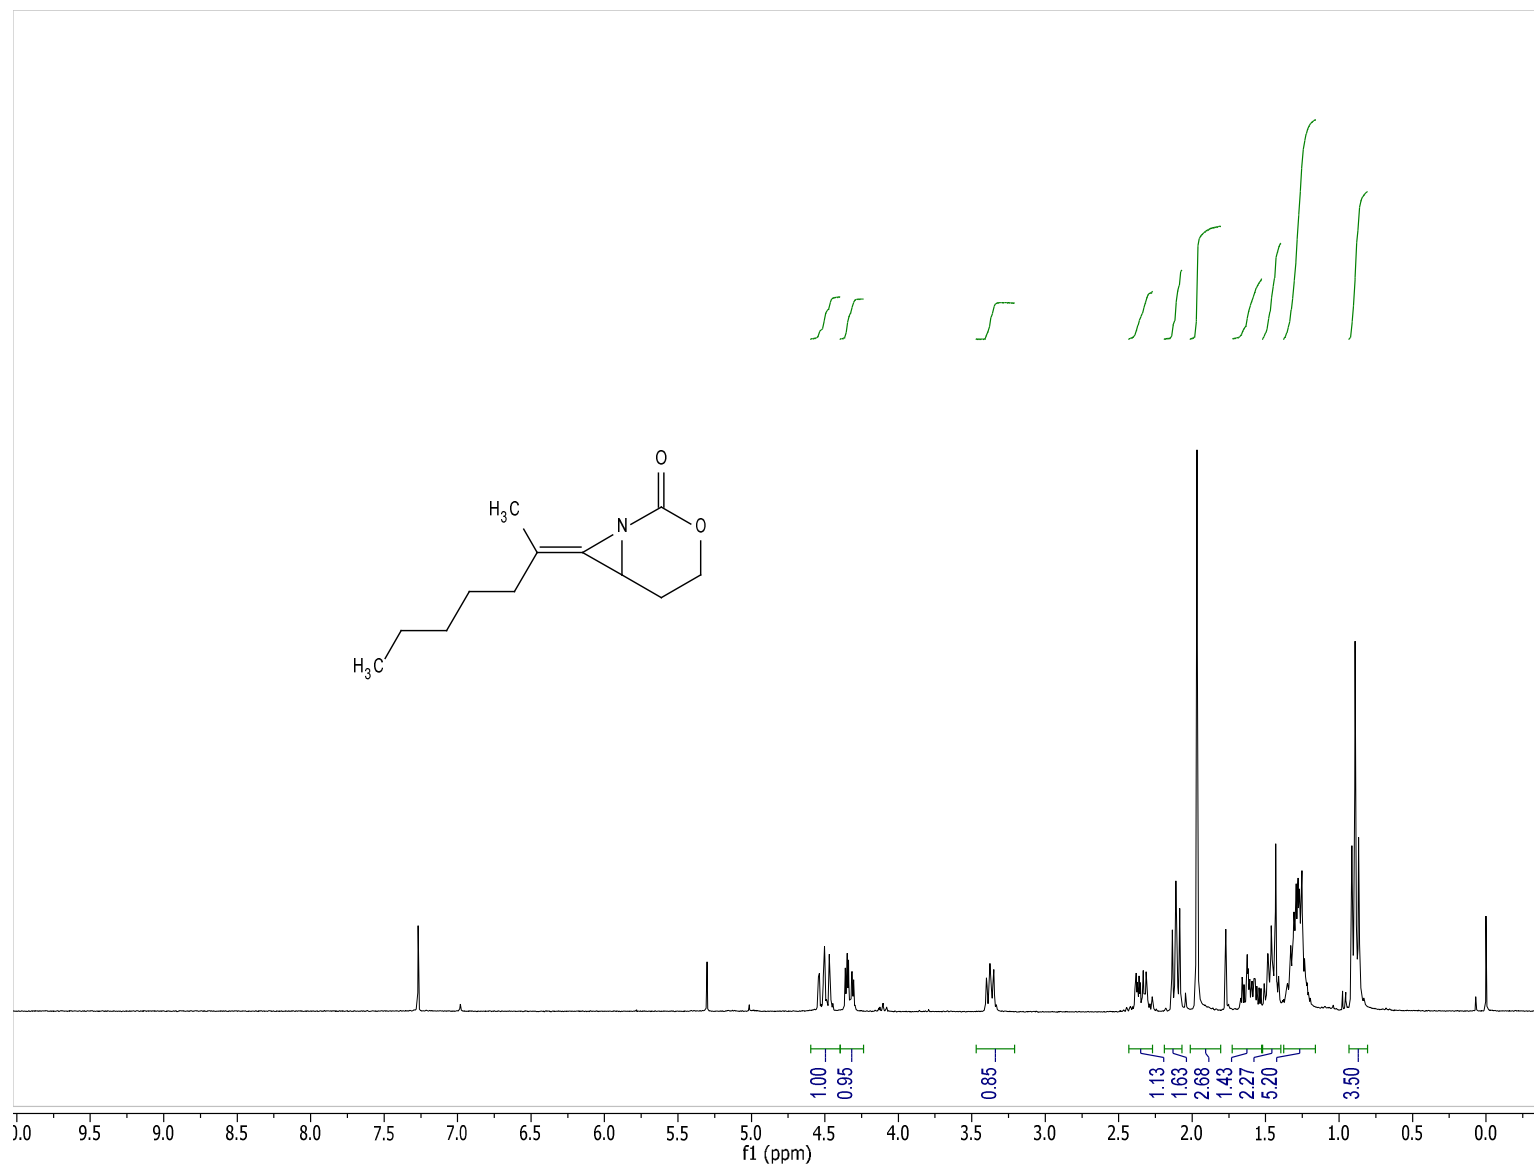

**Compound 8l.**

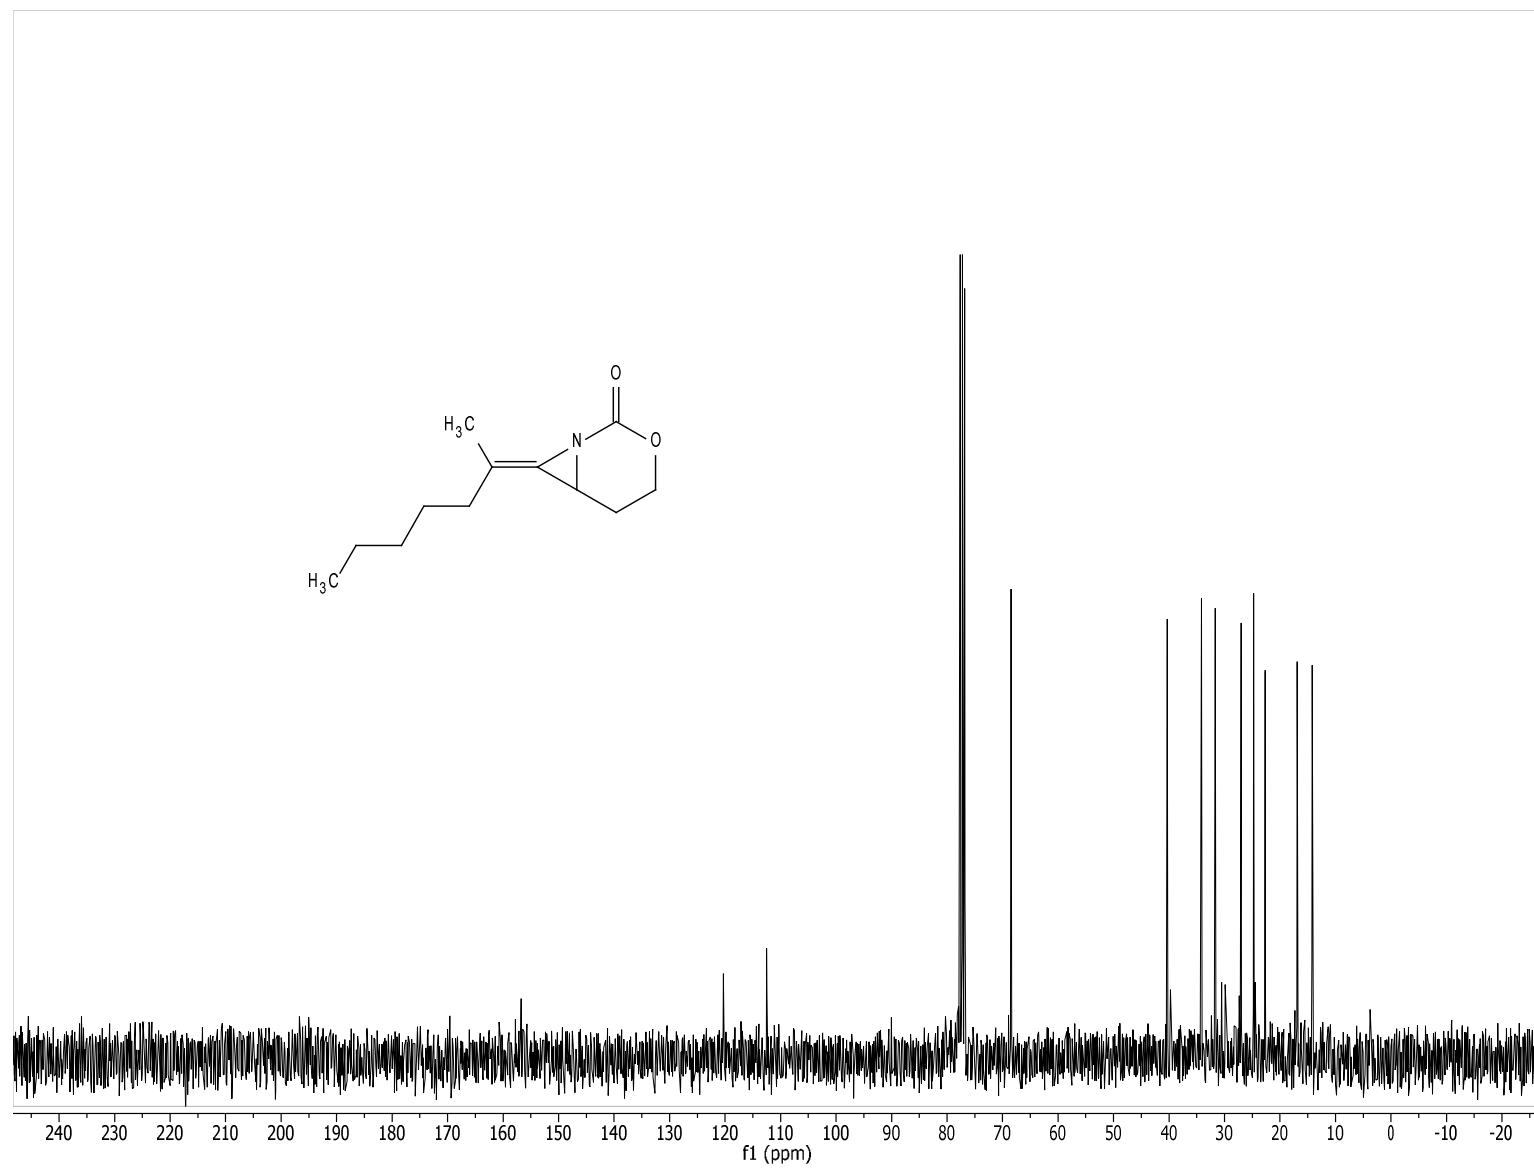

# Compound 8m.

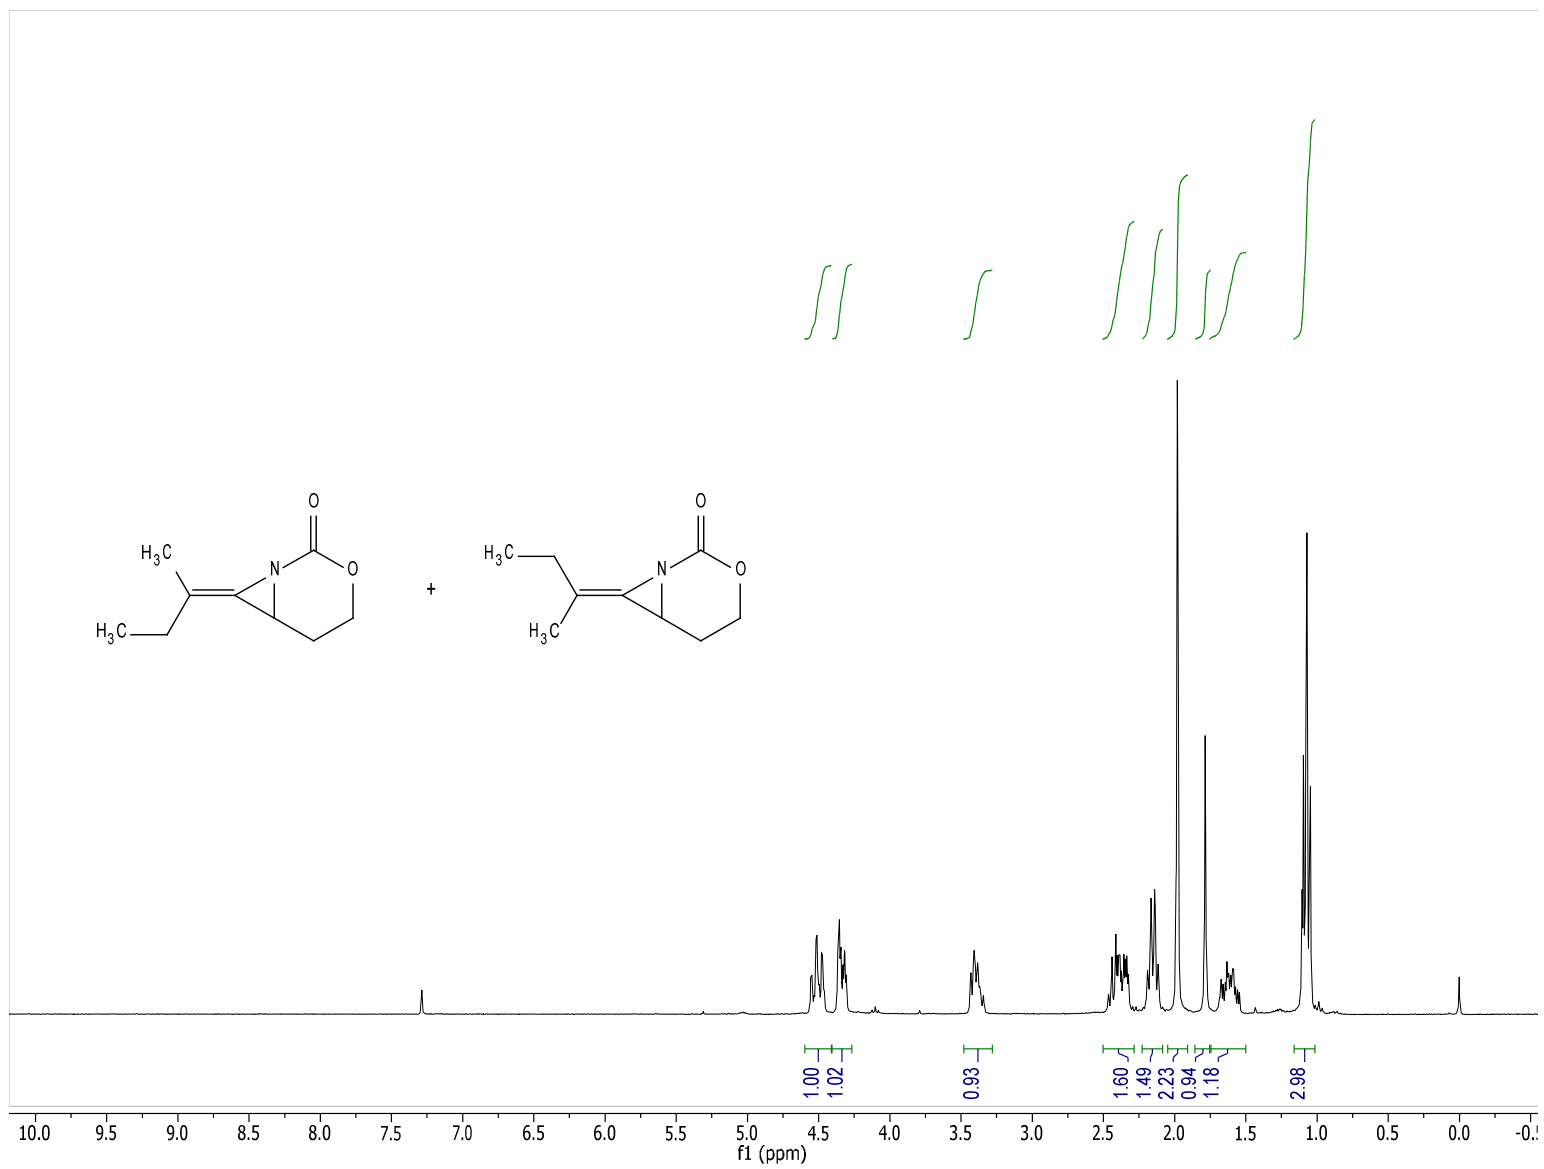

**Compound 8m.**

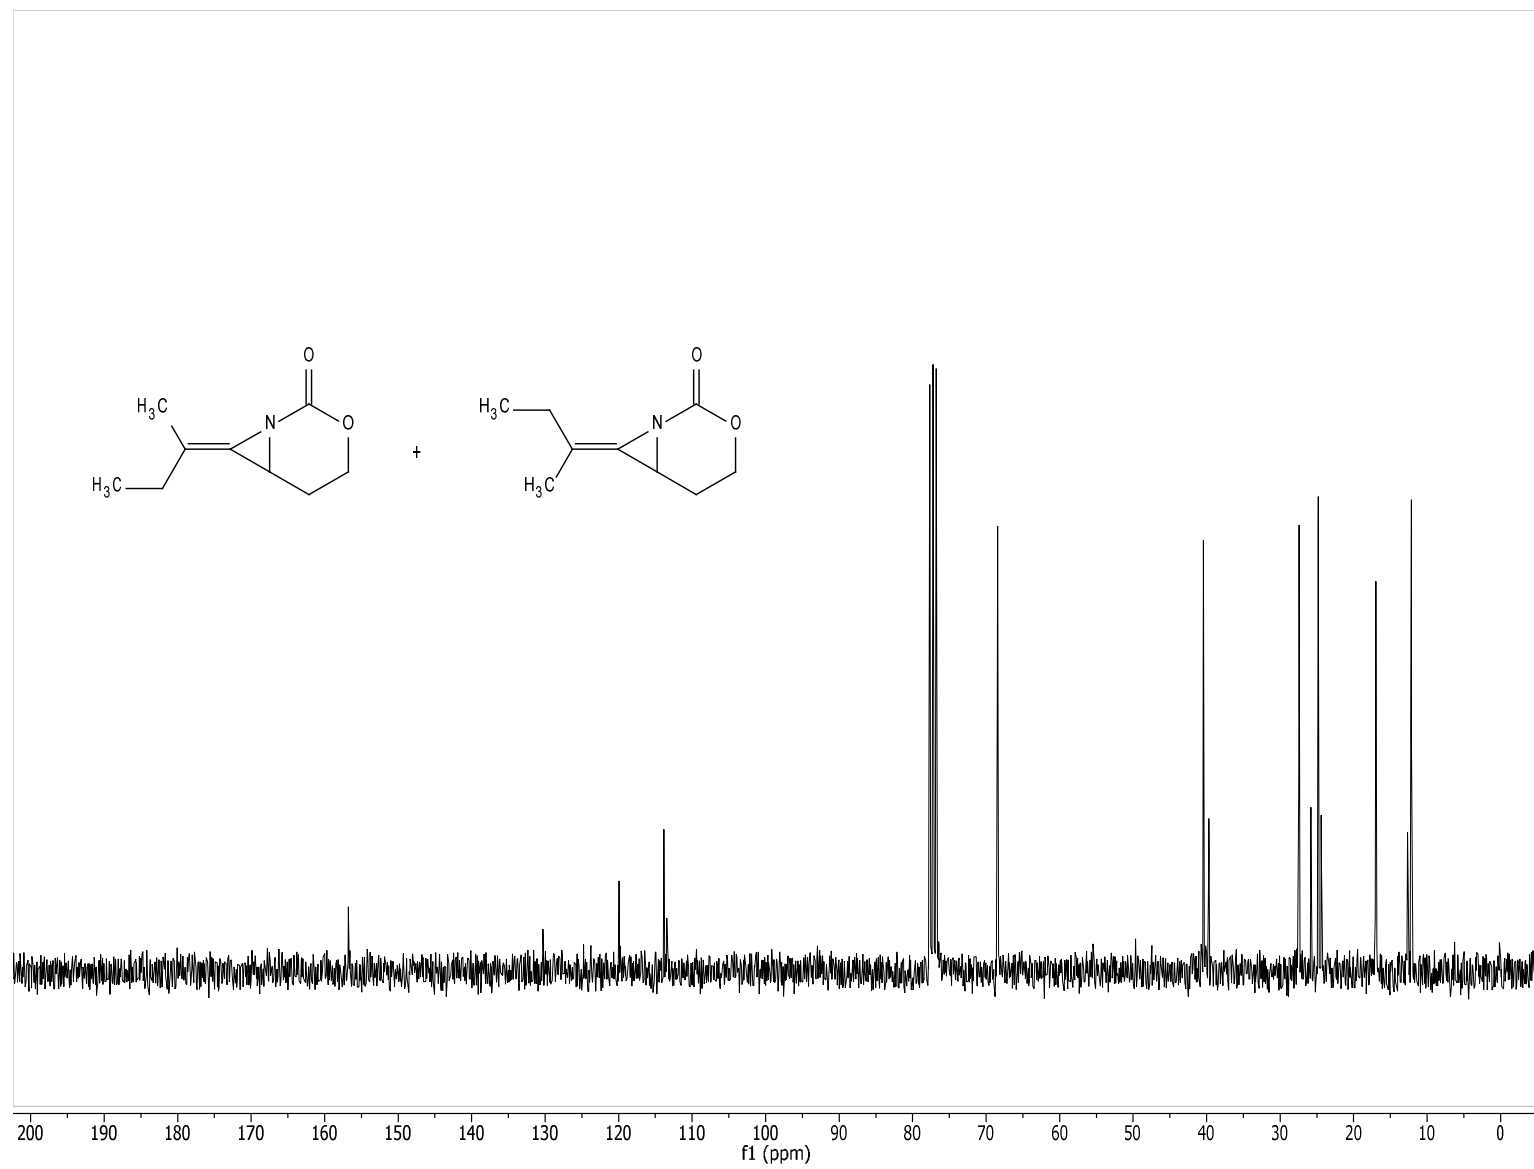



Compound 6a.

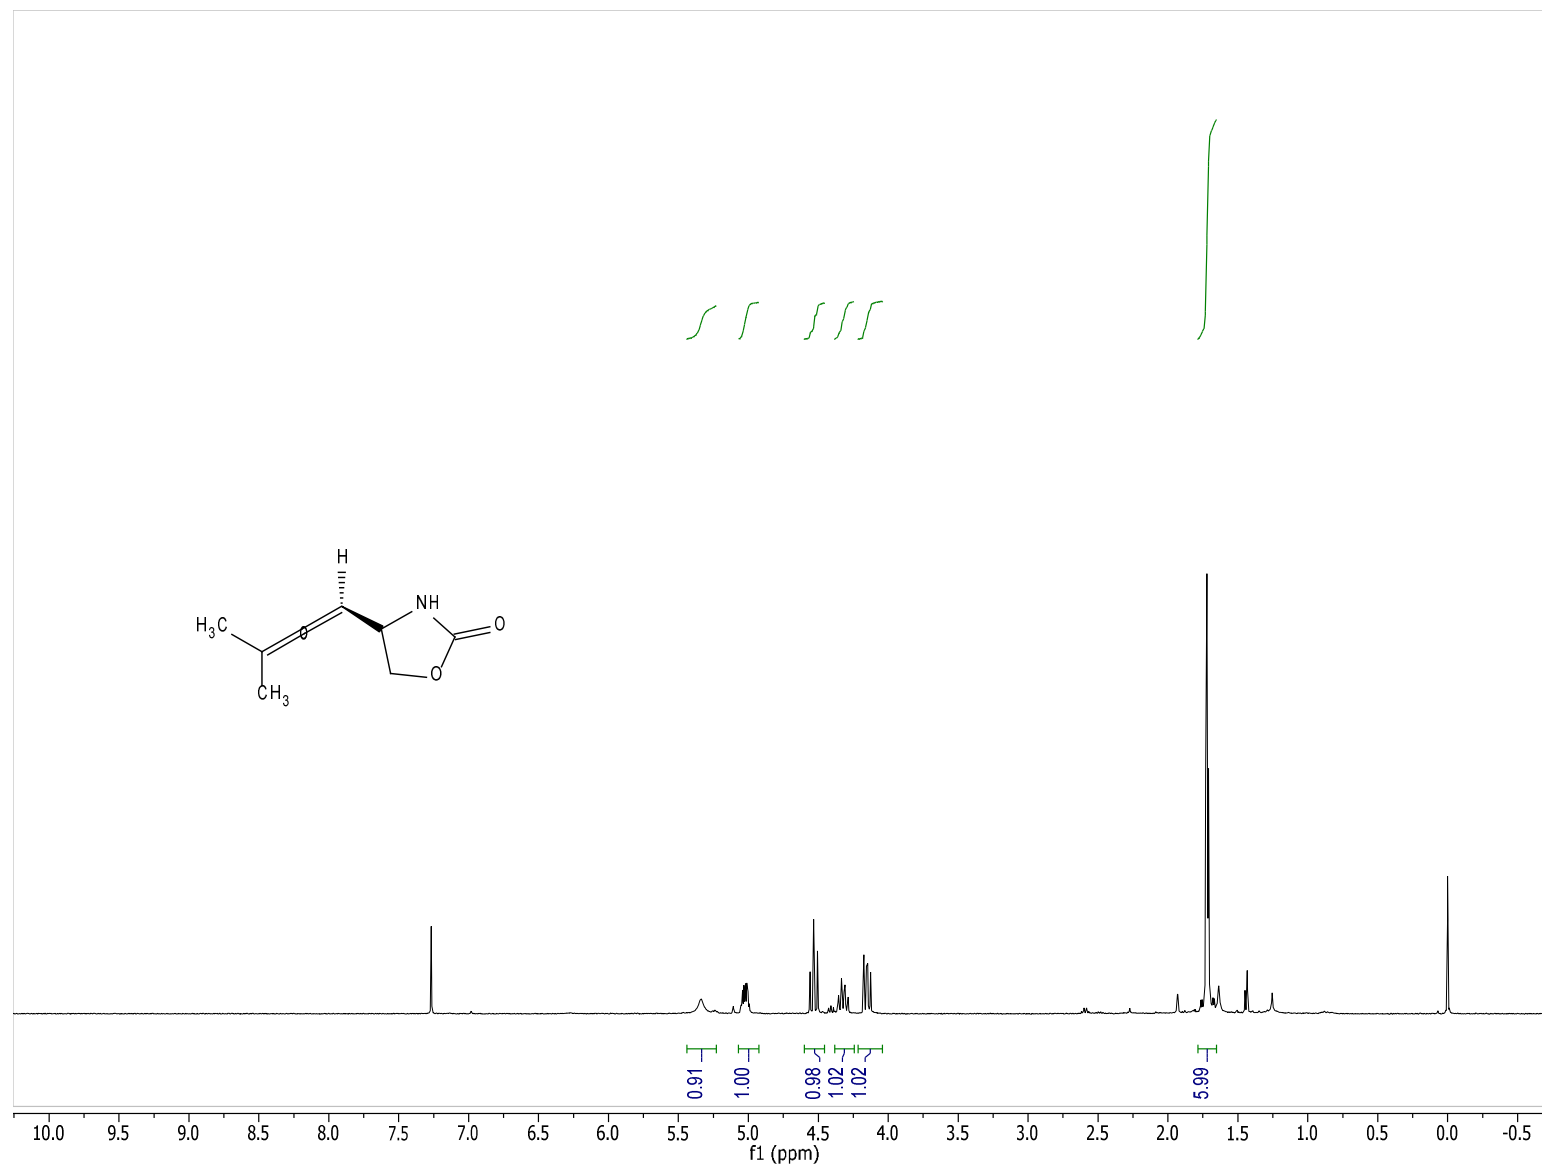

**Compound 6a.**

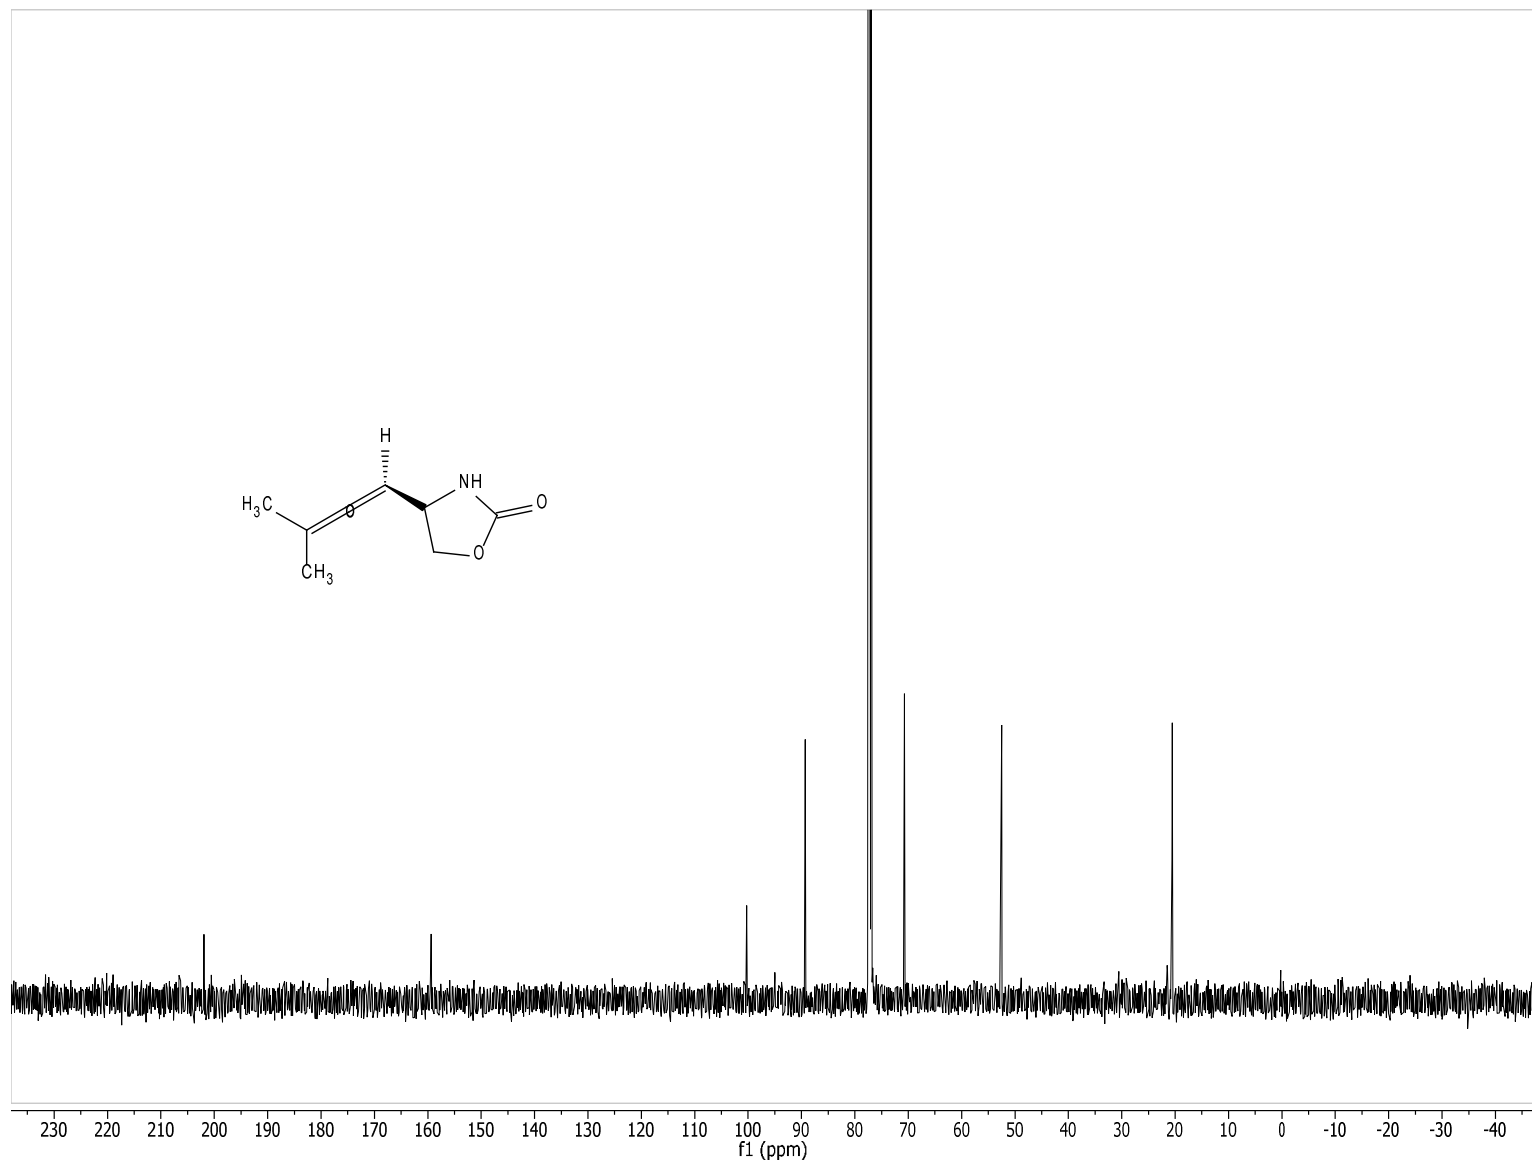

Compound 9l.

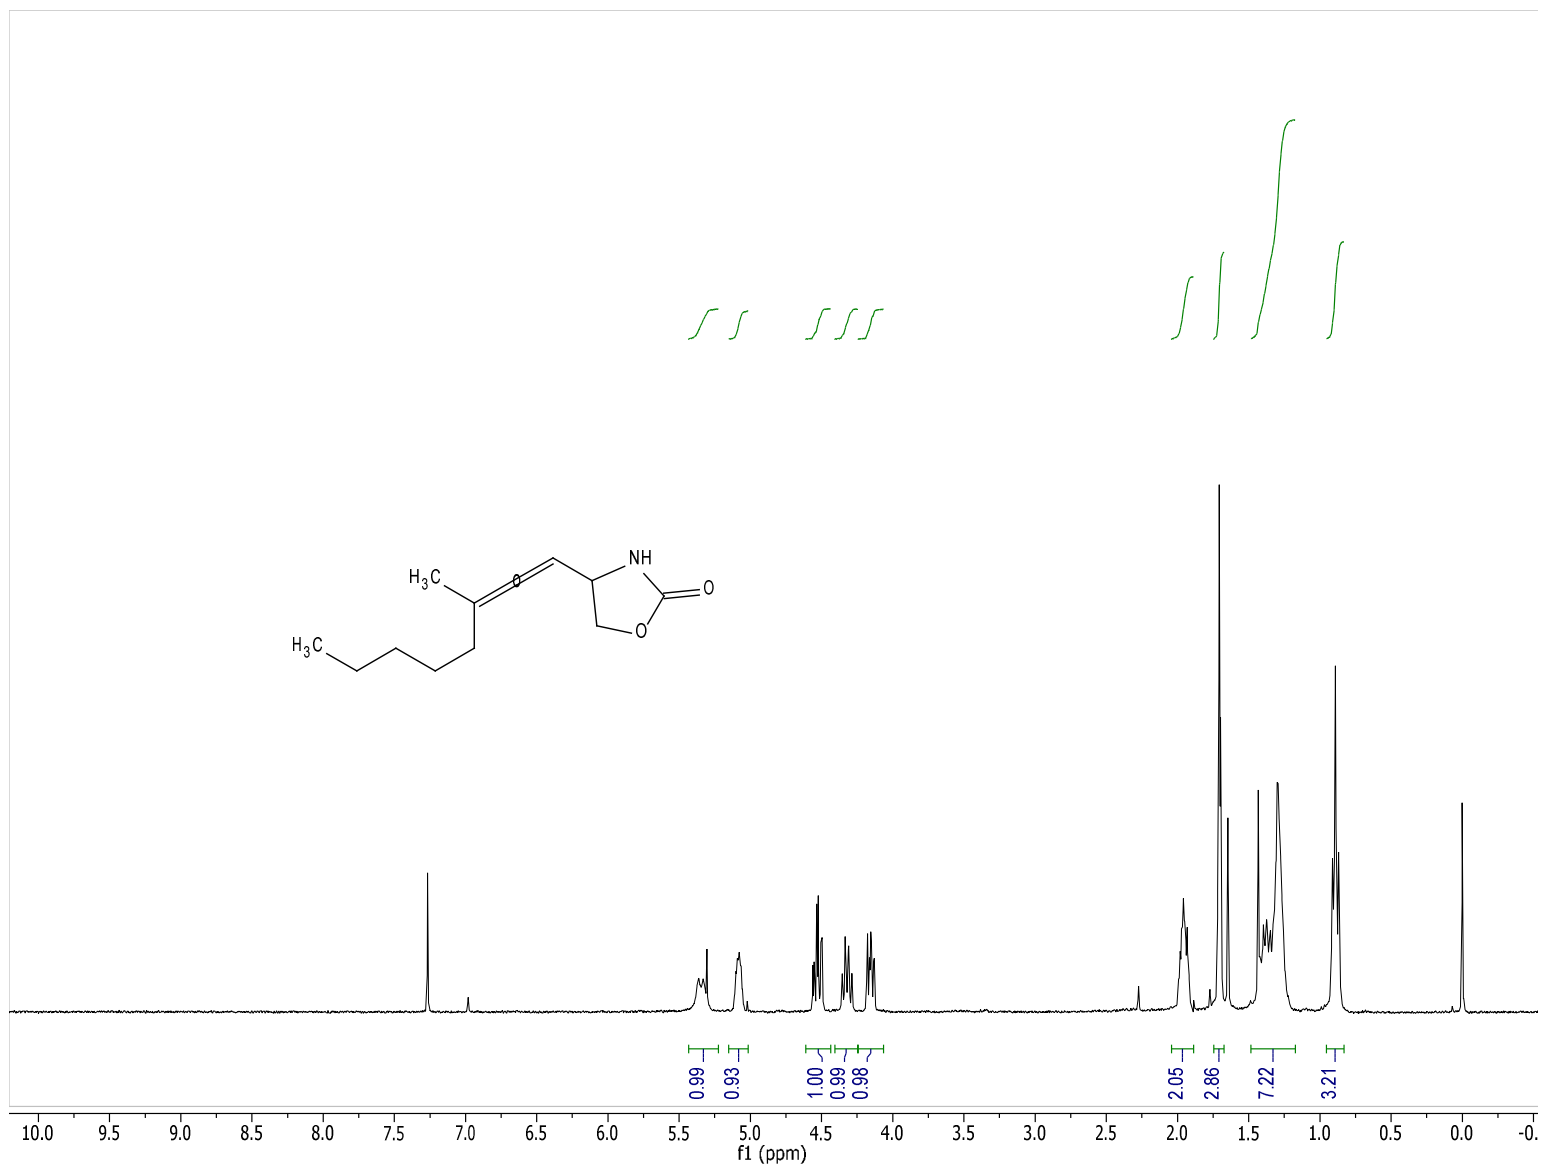

**Compound 9l.**

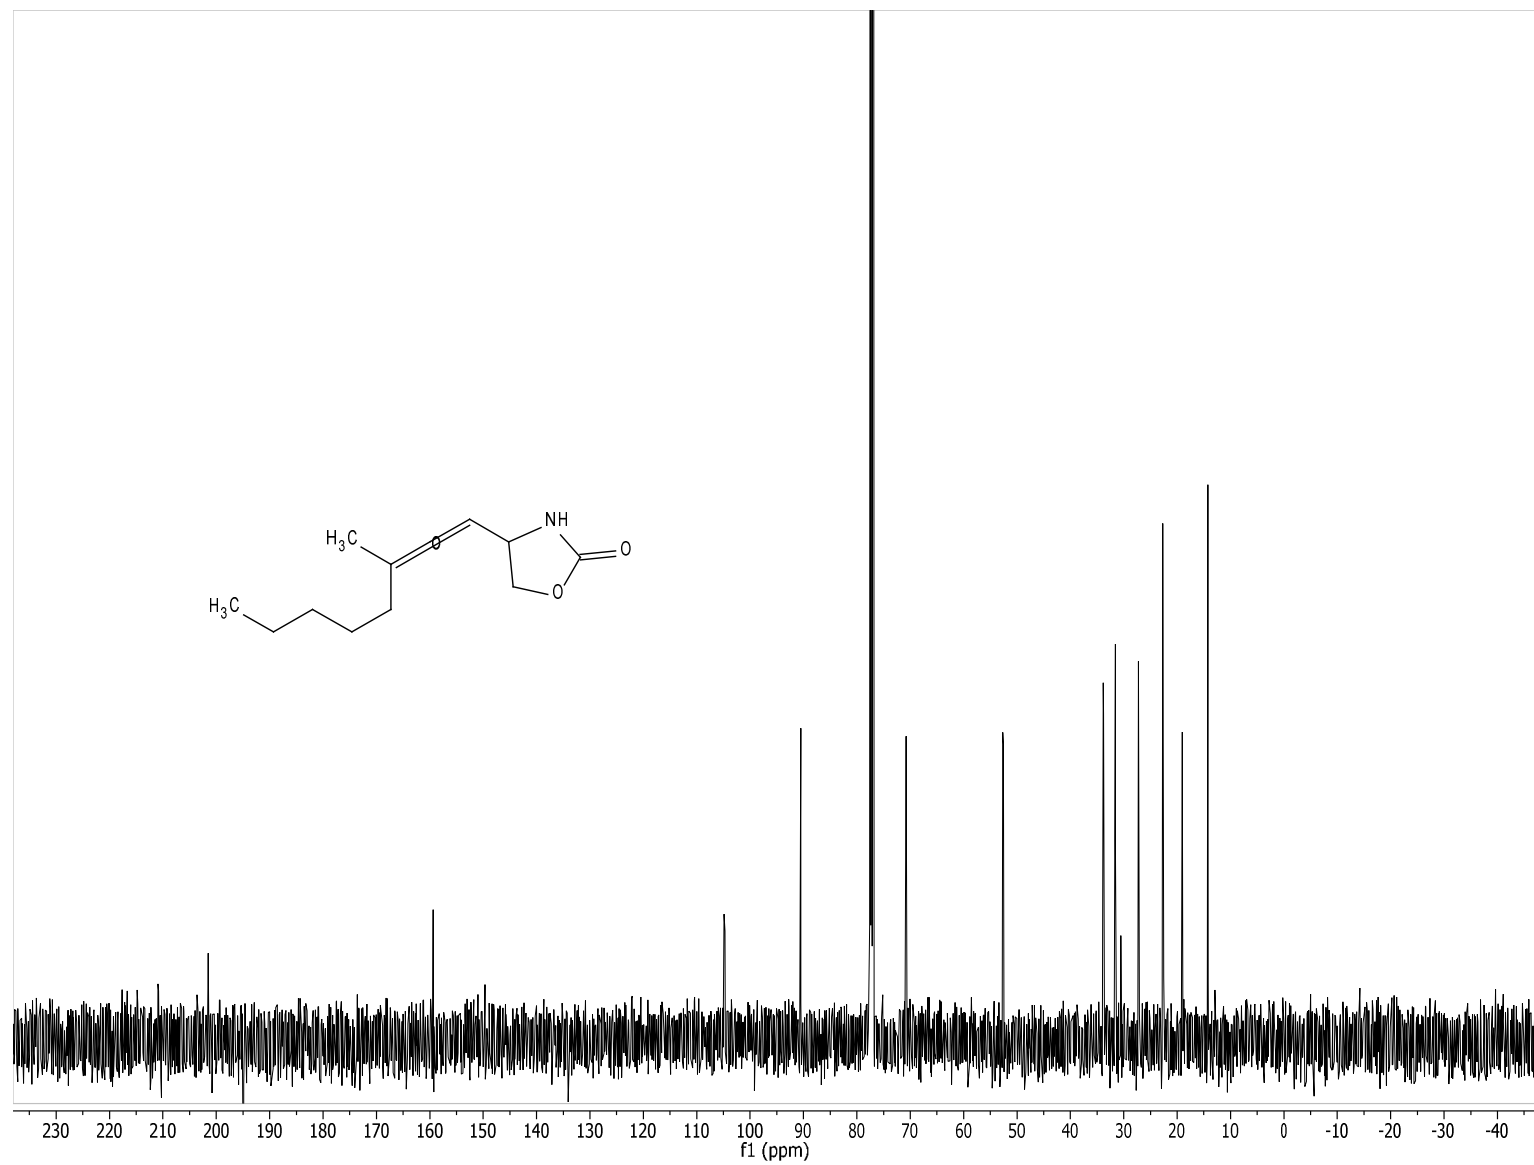

Compound 9m.

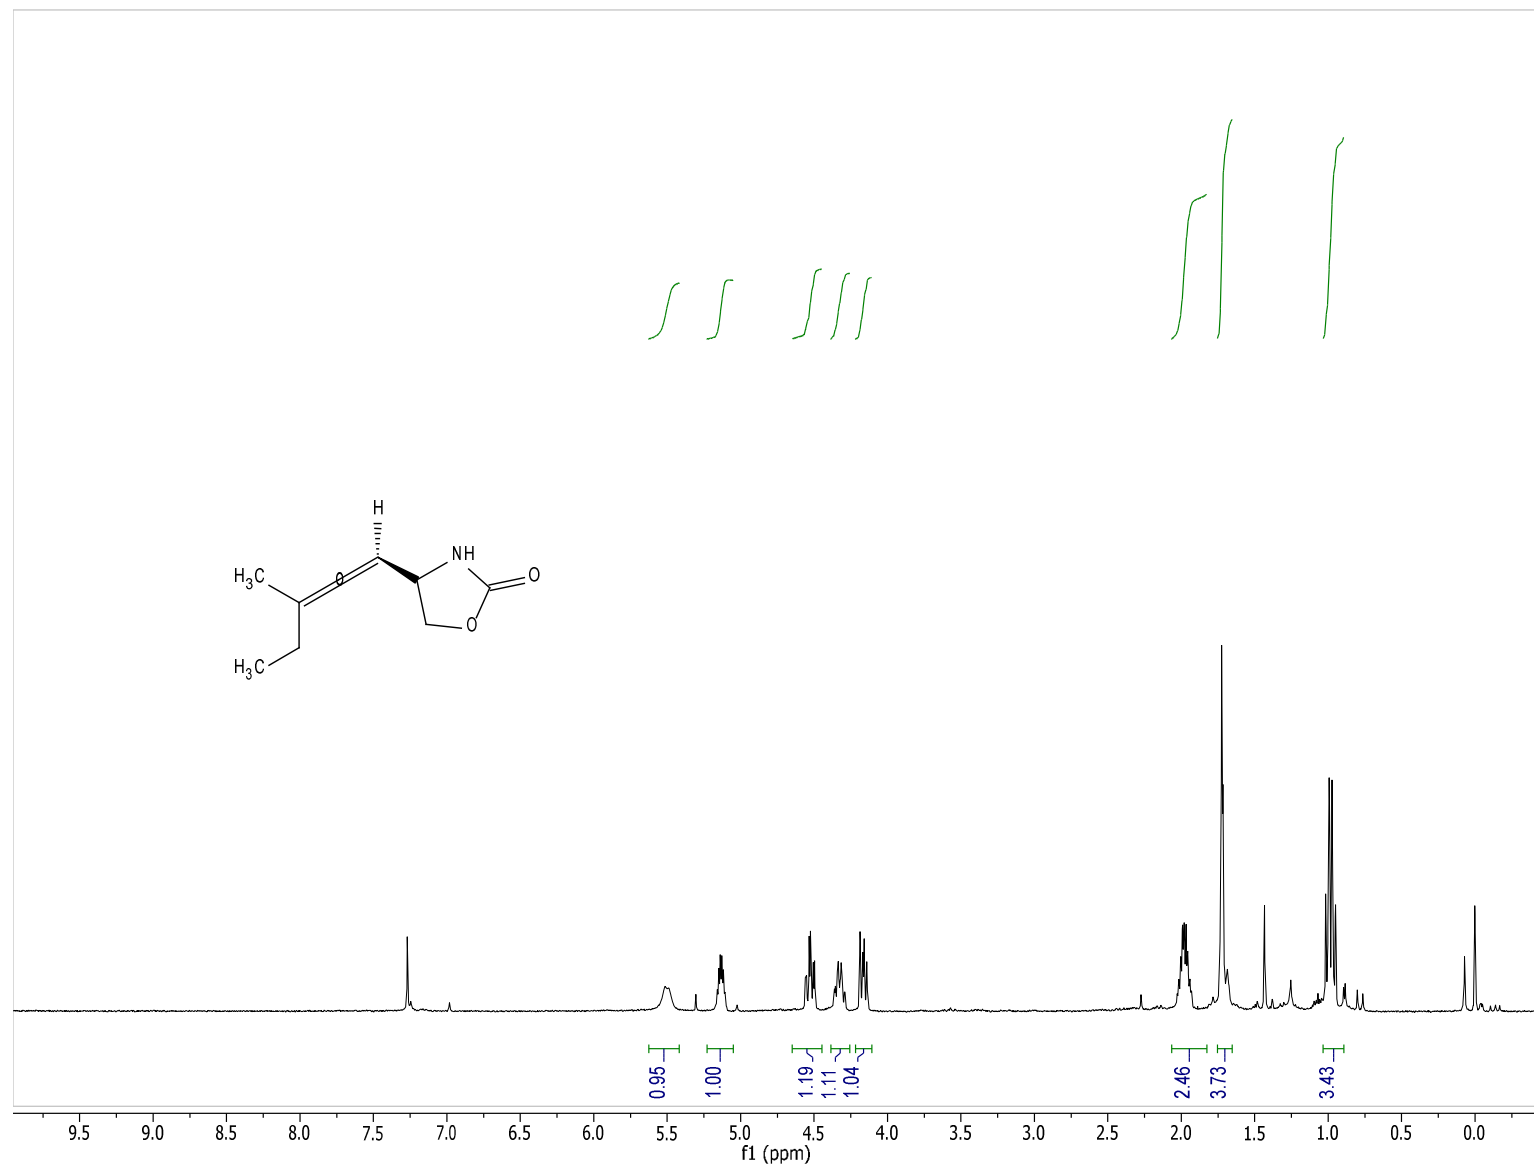

S1-53

Compound 9m.

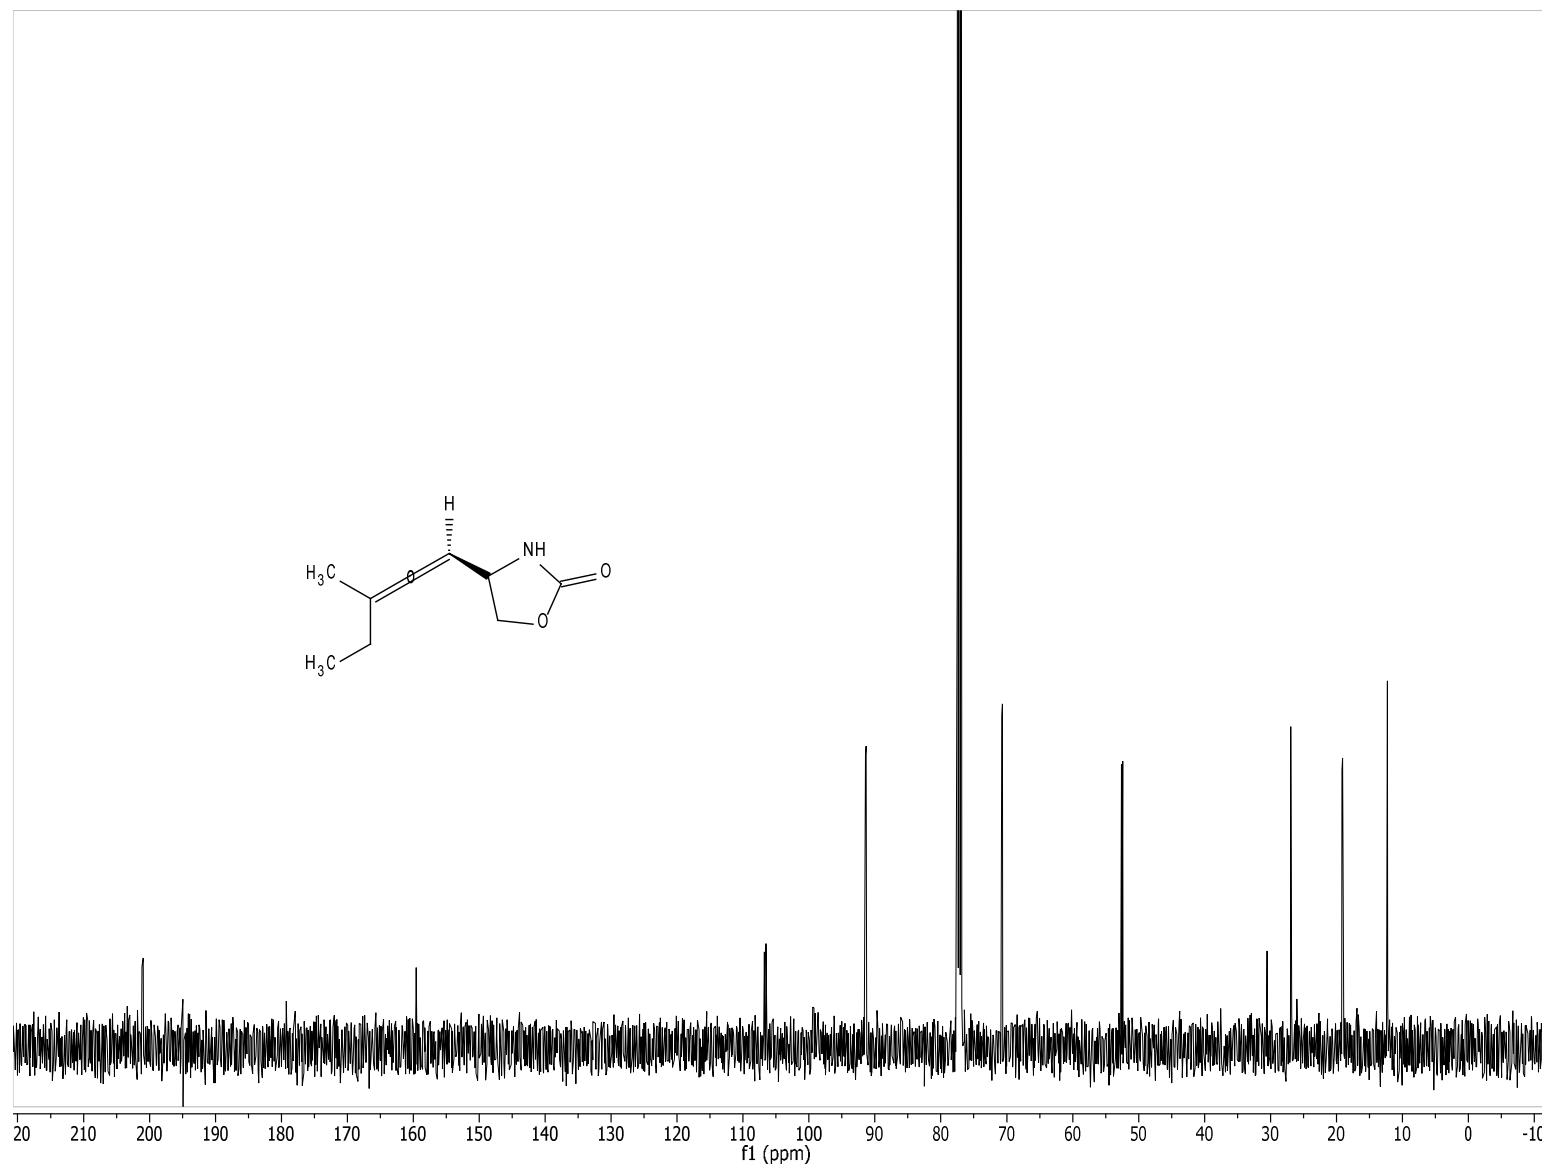

Supplement: NIHMS431403-supplement-2_si_002.pdf [file NIHMS431403-supplement-2_si_002.pdf]
